# Supplementary material for: Calcium carbide residue – a promising hidden source of hydrogen
Source: Royal Society of Chemistry journal article supplement (doi:10.1039/d2gc04932e), 2023-01-01
Supplement: d2gc04932e1.pdf [file d2gc04932e1.pdf]

## Supporting information for the article

### Calcium carbide residue – promising hidden source of hydrogen

**Kristina A. Lotsman and Konstantin S. Rodygin\***

Institute of Chemistry, Saint Peterburg State University, Universitetskiy pr. 26, Stary Petergof 198504, Russia. E-mail: k.rodygin@spbu.ru

# Contents

|                                                                                   |    |
|-----------------------------------------------------------------------------------|----|
| <b>S1. Materials and methods</b> .....                                            | 3  |
| <b>S2. General procedures</b> .....                                               | 4  |
| <b>S4. Determination of calcium hydroxide content in CCRs by powder XRD</b> ..... | 11 |
| <b>S5. NMR spectra</b> .....                                                      | 16 |
| <b>S6. SEM and EDX data</b> .....                                                 | 39 |
| <b>S7. Powder XRD of residues after hydrogen evolution</b> .....                  | 58 |
| <b>S8. References</b> .....                                                       | 63 |

## S1. Materials and methods

**Materials.** Calcium carbide (granulated, particle size 0.1-1 mm, 75 % of acetylene (gas-volumetric as indicated by the supplier)), calcium metal (lump, 99%), magnesium (powder, 99%), aluminium (powder, 91%), calcium hydroxide (95%) were purchased from Sigma-Aldrich and used without further purification. Zinc metal (powder PRS (96%)), palladium (5% on activated carbon powder), ethyl cinnamate (98%) were purchased from Panreac, Alfa Aesar and abcr GmbH&Co, respectively, and used as received. Calcium was grinded in an argon flow before using.

**Instrumentation.**  $^1\text{H}$  spectra were recorded using a Bruker Avance 400 NMR spectrometer. The  $^1\text{H}$  chemical shifts were reported in ppm and were determined by referencing the peaks to the residual solvent peaks. The data were processed using MestReNova (version 6.0.2) desktop NMR data processing software.

XRD data were recorded by using a Bruker "D2 Phaser" powder diffractometer operating with X-ray tube radiation -  $\text{CuK}\alpha_{1+2}$ , wavelengths  $\lambda_{\text{CuK}\alpha 1} = 1.54059 \text{ \AA}$  and  $\lambda_{\text{CuK}\alpha 2} = 1.54443 \text{ \AA}$ , tube operation mode 30 kV / 10 mA, position-sensitive detector, reflection geometry, Bragg-Brentano focusing scheme, sample rotation speed 20 rpm, diffraction angle interval  $2\theta = 5(6.8)\text{-}90^\circ$ , scanning step  $0.02^\circ$ , exposure at a point 0.7 seconds,  $T=25^\circ\text{C}$ , atmosphere – air.

The morphologies of the samples were observed on a Zeiss Merlin SEM. EDX measurement were performed at 20 kV of accelerating voltage with the Oxford Instruments INCA X-Act spectrometer mounted on Zeiss Merlin SEM.

## S2. General procedures

**Safety statement.** *Hydrogen is a flammable gas and no more or less dangerous than other flammable organic solvents (like ether, pentane, etc.). Hydrogen gas must be handled according to the stated conditions.<sup>1</sup> In this work, no elevated pressure was observed, and hydrogen was used under atmospheric pressure (bubbling method). Although hydrogen was obtained under high temperature, no explosion was possible due to rapid cooling of released hydrogen, when transfer through joints and units. Note, the hydrogen was immediately removed from the heat zone and cooled. Open flame sources are strictly prohibited near the reaction set.*

**General procedure for obtaining hydrogen from Ca(OH)<sub>2</sub> or CCRs and metals (Zn, Mg, Fe, Al, Ca).** Calcium hydroxide or CCR (148 mg (or 152 mg for CCRs-d<sub>2</sub>), 2 mmol) and metal powder (2.5 mmol) (preliminarily mixed) were placed in a 2 ml quartz tube. In the case of iron and calcium, the tube was additionally purged with argon. Then, the tube was connected to a silicone tube, the other end of which was lowered into a cylinder filled with water (Fig. S1). The quartz tube was placed in a tube furnace heated to an appropriate temperature (for zinc, magnesium, aluminium and iron - 700 °C, for calcium - 500 °C) and kept at this temperature until the gas evolution completed (in most cases, 45 minutes). The volume of the released gas corresponded to displaced water volume. To determine the composition of the residues remaining after the gas evolution, the test tube was connected to argon and cooled to room temperature.

**Blank experiment.** A quartz tube with calcium hydroxide (148 mg, 2 mmol) was placed using the system from the previous experiment (Fig. S1) into a tube furnace heated to 700 °C. As a result, 3 ml of gas was released for 45 minutes at an appropriate temperature. This volume was subtracted from the volume of the evolved gas in the hydrogen production experiments (Tables 1-3).

**The procedure for obtaining CCR1.** Calcium carbide (1.28 g, 20 mmol) was placed in a flask cooled in an ice bath. Water (2 ml, 111 mmol) was then added dropwise to the flask. After completion of the reaction, the mixture was additionally stirred for 30 minutes, filtered, and the residue was dried at 100 °C. The content of calcium hydroxide in the sample was determined using powder XRD.

**The procedure for obtaining CCR2.** The inorganic residue after fenchol vinylation was taken as the residue after carbide hydrolysis.<sup>2</sup> KF (2.03 g, 35 mmol), KOH (1.79 g, 32 mmol), fenchol (4.54 g, 30 mmol), DMSO (30 ml), calcium carbide (5 g, 78 mmol) and water (2.5 ml, 139 mmol) were loaded into a pressure vessel. The reactor was closed and the reaction mixture was stirred at 130 °C for 4 hours, cooled to room temperature, and filtered. The residue was additionally washed with water (2 × 10 ml) and acetone (10 ml), then dried at 100 °C. The content of calcium hydroxide in the sample was determined using powder XRD.

**The procedure for obtaining CCR1-d<sub>2</sub> (air).** Calcium carbide (1.28 g, 20 mmol) was placed in a flask and cooled in an ice bath. D<sub>2</sub>O (2 ml, 100 mmol) was added dropwise to the flask. After completion, the mixture was additionally stirred for 30 minutes, filtered, and the residue was dried at 100 °C. The content of calcium hydroxide in the sample was determined using powder XRD.



**The procedure for obtaining CCR1-*d*<sub>2</sub> (dioxane).** The reaction was carried out in argon. Calcium carbide (1.28 g, 20 mmol) and 1,4-dioxane (5 mL) were placed in a flask cooled and in an ice bath. D<sub>2</sub>O (1.5 ml, 75 mmol) was added dropwise to the flask. After completion, the mixture was additionally stirred for 10 minutes, filtered, and the residue was dried in vacuum. The content of calcium hydroxide in the sample was determined using powder XRD.

**The procedure for obtaining CCR2-*d*<sub>2</sub>.** The inorganic residue after obtaining DPPEO<sub>2</sub>-*d*<sub>4</sub> (reaction without base)<sup>3</sup> was used as the residue after carbide hydrolysis. Diphenylphosphine oxide (500 mg, 2.5 mmol), DMSO-*d*<sub>6</sub> (5 ml), calcium carbide (640 mg, 10 mmol) and D<sub>2</sub>O (0.8 ml, 40 mmol) were loaded into a pressure tube. Then the tube was closed and the reaction mixture was stirred at 130 °C for 5 hours, cooled to room temperature, and the reaction mixture was filtered. The inorganic residue on the filter was washed with methylene chloride (10 ml) from the reaction product and acetone (10 ml), then dried in vacuum. The content of calcium hydroxide in the sample was determined using powder XRD.

**The procedure for obtaining CCR3-*d*<sub>2</sub>.** The inorganic residue after DPPEO<sub>2</sub>-*d*<sub>4</sub> isolation (reaction with KF)<sup>3</sup> was used as a residue after carbide hydrolysis. Diphenylphosphine oxide (500 mg, 2.5 mmol), 1,4-dioxane (4.5 ml), DMSO-*d*<sub>6</sub> (0.5 ml), KF (170 mg, 2.9 mmol), calcium carbide (640 mg, 10 mmol) and D<sub>2</sub>O (0.8 ml, 40 mmol) were loaded into a pressure tube. Then the tube was closed and the reaction mixture was stirred at 80 °C for 3 hours, cooled to room temperature and filtered. The inorganic residue on the filter was washed with methylene chloride (10 ml) to remove the organic products, acetone (10 ml), and water (10 ml) to remove the base and again with acetone (10 ml), then dried in vacuum. The content of calcium hydroxide in the sample was determined using powder XRD.

**General procedure for the hydrogenation of ethyl cinnamate using CCRs-derived hydrogen.** The reaction was carried out according to the modified method.<sup>4</sup> Ethyl cinnamate (26 µl, 0.16 mmol), 5% Pd/C (17 mg) and benzene (2.5 ml) were loaded into a flask with valve and stirred for 5 minutes at room temperature. Then, the reaction mixture was heated to 50 °C. Calcium hydroxide (142 mg, 1.92 mmol) and metal powder (2.4 mmol) (previously mixed) were loaded into a 2 ml quartz tube, the tube was connected to the flask with a silicon tube with a needle placed into the reaction mixture (Fig. S2). Then the quartz tube was placed in an oven heated to 700 °C (zinc) or 500 °C (calcium). Hydrogen evolution was observed. The reaction mixture in the flask was stirred at 50 °C. Hydrogen evolution completed after 45 minutes. Additional stirring for 45 minutes (as in the original method (1.5 hours))<sup>4</sup> did not increase the alkene conversion (Table S1), so the reaction was carried out only during hydrogen evolution (45 minutes). In some cases, a new part of mixed calcium hydroxide and metal was added and the reaction mixture was stirred for additional 45 minutes. After that, the cooled reaction mixture was filtered through Celite pad and the solvent was evaporated.

The other substrates (Table S3) were hydrogenated using the same procedure.

**Preparation of a dry catalyst for deuteration.** The flask was charged with 5% Pd/C (100 mg) and benzene (5 ml), stirred for 5 minutes, then the solvent was evaporated, while the formation of palladium black was observed. The operations were repeated twice, after which the residue was dried in a vacuum. To carry out hydrogenation using

D<sub>2</sub>, the required amount of catalyst was taken, and the reaction was carried out in 1 ml of benzene-*d*<sub>6</sub>. In this case, the loading of other reagents was reduced by 2 times.

### S3. Detailed hydrogen generation experiments

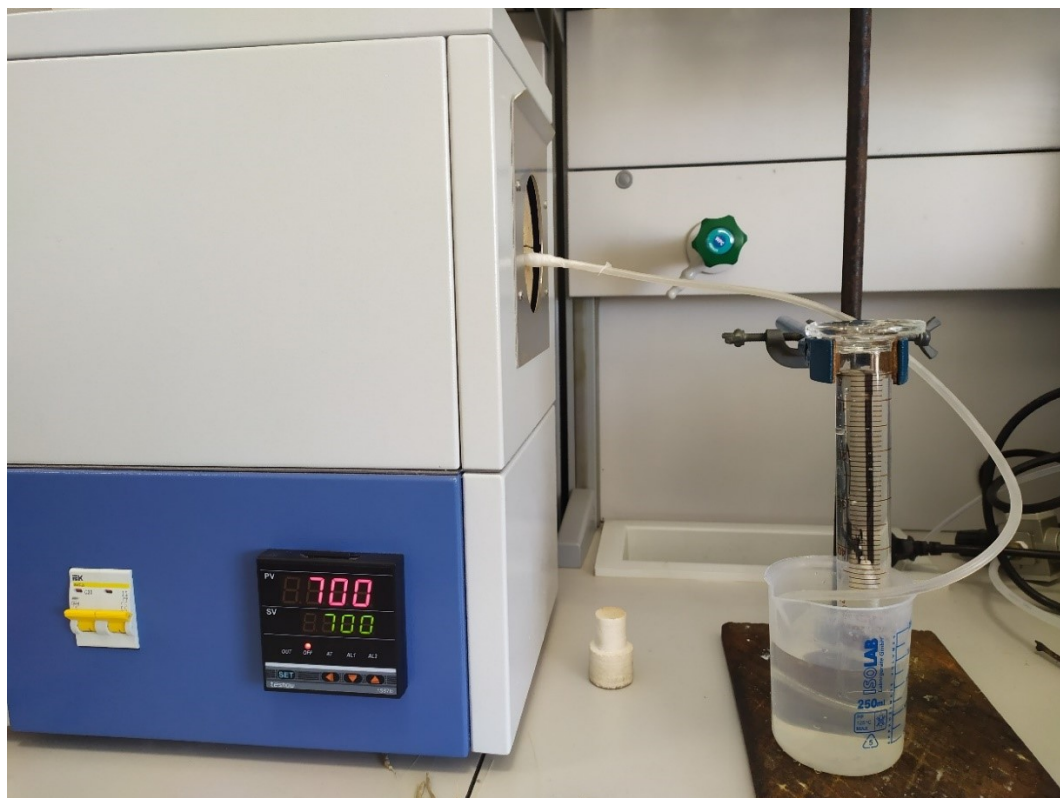

**Figure S1.** Hydrogen generation experiment system

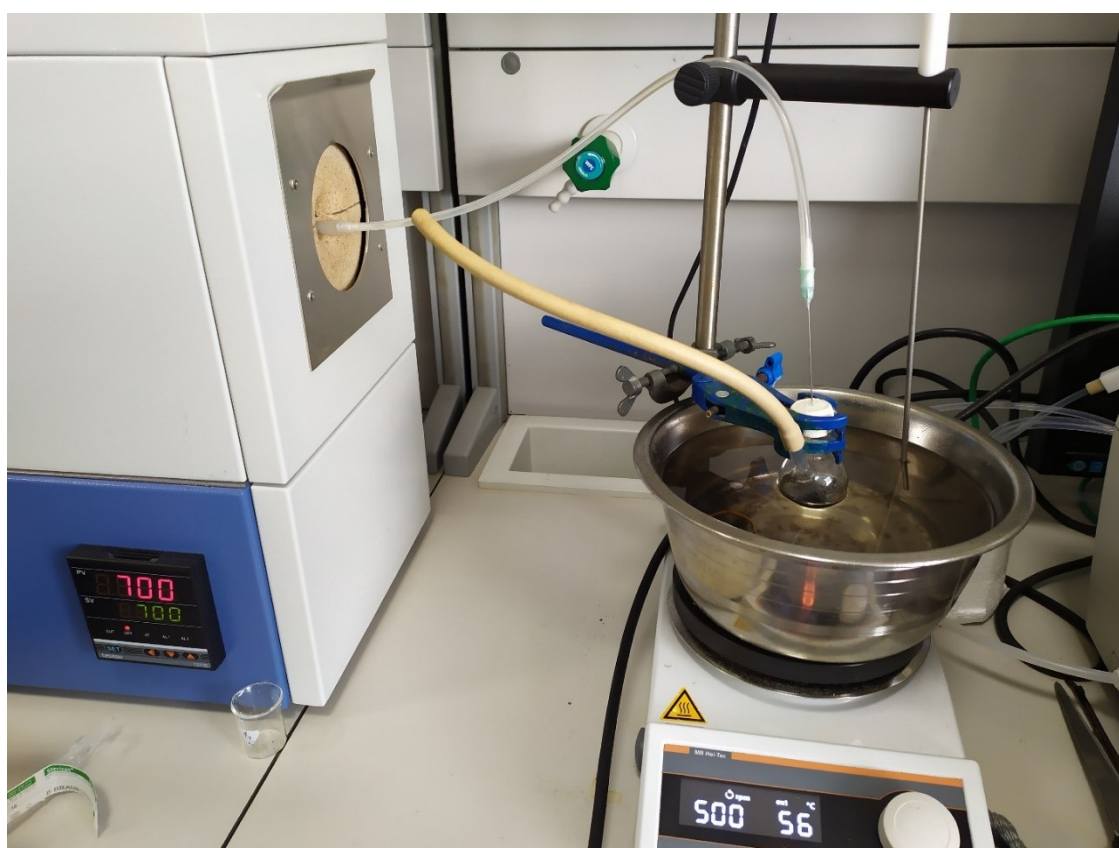

**Figure S2.** Hydrogenation using hydrogen from CCRs

**Table S1.** Total table on optimizing of hydrogen evolution from calcium hydroxide with various metals.

| Entry | Metal    | T, °C | Ratio (Ca(OH) <sub>2</sub> : Me), mol | Time, min | V <sub>g</sub> , <sup>a</sup> mL | Yield, <sup>b</sup> % |
|-------|----------|-------|---------------------------------------|-----------|----------------------------------|-----------------------|
| 1     | Zn       | 500   | 1:1                                   | 45        | 12                               | 21                    |
| 2     | Zn       | 650   | 1:1                                   | 45        | 30                               | 62                    |
| 3     | Zn       | 700   | 1:1                                   | 45        | 37                               | 78                    |
| 4     | Zn       | 750   | 1:1                                   | 45        | 37                               | 78                    |
| 5     | Zn       | 700   | 1:1.25                                | 45        | 45                               | 97                    |
| 6     | Zn       | 700   | 1:1.5                                 | 150       | 37                               | 78                    |
| 7     | Zn       | 650   | 1:1.25                                | 45        | 35                               | 74                    |
| 8     | Zn       | 750   | 1:1.25                                | 60        | 43                               | 92                    |
| 9     | Mg       | 700   | 1:1                                   | 60        | 32                               | 67                    |
| 10    | Mg       | 700   | 1:1.25                                | 60        | 33                               | 69                    |
| 11    | Mg       | 700   | 1:1.5                                 | 90        | 33                               | 69                    |
| 12    | Al       | 800   | 1:0.67                                | 120       | 3                                | 0                     |
| 13    | Fe (air) | 700   | 1:0.67                                | 120       | 12                               | 21                    |
| 14    | Fe (Ar)  | 700   | 1:0.67                                | 120       | 20                               | 39                    |
| 15    | Fe (Ar)  | 700   | 1:1.25                                | 45        | 16                               | 30                    |
| 16    | Ca       | 500   | 1:1.25                                | 45        | 41                               | 87                    |

<sup>a</sup> The volume of gas released into the cylinder. <sup>b</sup> Hydrogen yield calculated considering the purity of calcium hydroxide (97%) and a blank run (3 mL).

**Table S2.** Total table on hydrogenation of substrate **1** by hydrogen obtained from CCRs

| Entry           | Metal | H <sub>2</sub> /D <sub>2</sub> source | Yield, <sup>a</sup> % | DI, <sup>a</sup> % | Yield, <sup>b</sup> % | DI, <sup>b</sup> % |
|-----------------|-------|---------------------------------------|-----------------------|--------------------|-----------------------|--------------------|
| 1               | Zn    | Ca(OH) <sub>2</sub>                   | 32 (32) <sup>c</sup>  | -                  | 34 (34) <sup>c</sup>  | -                  |
| 2               | Zn    | CCR1                                  | 4                     | -                  | -                     | -                  |
| 3               | Zn    | CCR2                                  | 5                     | -                  | -                     | -                  |
| 4               | Zn    | CCR1-d <sub>2</sub> <sup>d</sup>      | 3                     | 67                 | -                     | -                  |
| 5 <sup>e</sup>  | Zn    | CCR1-d <sub>2</sub> <sup>d</sup>      | 8                     | 75                 | 9                     | 76                 |
| 6               | Zn    | CCR1-d <sub>2</sub>                   | 2                     | f                  | 2                     | f                  |
| 7 <sup>e</sup>  | Zn    | CCR1-d <sub>2</sub>                   | 9                     | 61                 | 10                    | 58                 |
| 8               | Zn    | CCR2-d <sub>2</sub>                   | 5                     | 52                 | 13                    | 62                 |
| 9               | Zn    | CCR3-d <sub>2</sub>                   | -                     | -                  | 13                    | 74                 |
| 10              | Ca    | Ca(OH) <sub>2</sub>                   | 99                    | -                  | -                     | -                  |
| 11              | Ca    | CCR1                                  | 95                    | -                  | -                     | -                  |
| 12              | Ca    | CCR2                                  | 99                    | -                  | -                     | -                  |
| 13              | Ca    | CCR1-d <sub>2</sub> <sup>d</sup>      | 17                    | 34                 | 33                    | 45                 |
| 14 <sup>e</sup> | Ca    | CCR1-d <sub>2</sub> <sup>d</sup>      | 32                    | 58                 | 70                    | 60                 |
| 15              | Ca    | CCR1-d <sub>2</sub>                   | 81                    | 66                 | 97                    | 65                 |
| 16 <sup>e</sup> | Ca    | CCR1-d <sub>2</sub>                   | 94                    | 67                 | 99                    | 66                 |
| 17              | Ca    | CCR2-d <sub>2</sub>                   | 99                    | 64                 | 99                    | 65                 |
| 18              | Ca    | CCR3-d <sub>2</sub>                   | 99                    | 54                 | 99                    | 56                 |

<sup>a</sup> After addition the 1st part of the mixture to obtain hydrogen; the yield and deuterium incorporation (DI) were determined using <sup>1</sup>H NMR. <sup>b</sup> After addition the 2nd part of the mixture to obtain hydrogen; the yield and deuterium incorporation (DI) were determined using <sup>1</sup>H NMR. <sup>c</sup> After additional stirring of the mixture for 45 minutes after hydrogen evolution completed. <sup>d</sup> Air dried at 100 °C. <sup>e</sup> In benzene-*d*<sub>6</sub> and with the dry catalyst. <sup>f</sup> Was not determined due to low concentration in the mixture.

**Table S3.** Hydrogenation scope using hydrogen generated from CCR2 and Ca <sup>a</sup>

| Entry | Substrate                                                                           | Product                                                                             | NMR yield, mol% |
|-------|-------------------------------------------------------------------------------------|-------------------------------------------------------------------------------------|-----------------|
| 1     | 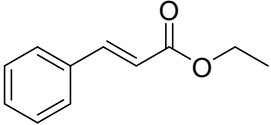   |    | 99              |
| 2     |    |    | 73              |
| 3     |    |    | 91              |
| 4     |    |    | 99              |
| 5     |    |    | 99              |
| 6     |   |   | 69              |
| 7     |  |  | 88              |
| 8     |  |  | 89              |

<sup>a</sup> The reaction was carried out for 45 minutes as for substrate **1** (Table 4, entry 3, with calcium, see main text and general procedure).

## S4. Determination of calcium hydroxide content in CCRs by powder XRD

**Table S4.** Quantitative phase analysis of samples (wt. %) according to full-profile analysis by the Rietveld method.

|                                    | Ca(OH) <sub>2</sub> | CCR1 | CCR2 | CCR1-d <sub>2</sub><br>(air) | CCR1-d <sub>2</sub><br>(dioxane) | CCR2-d <sub>2</sub> | CCR3-d <sub>2</sub> |
|------------------------------------|---------------------|------|------|------------------------------|----------------------------------|---------------------|---------------------|
| Portlandite – Ca(OH) <sub>2</sub>  | 97.2                | 96.7 | 61.6 | 99.5                         | 91.6                             | 96.6                | 77.2                |
| Calcite – CaCO <sub>3</sub>        | 2.8                 | 1.1  | 2.4  | <1                           | -                                | -                   | -                   |
| Graphite – C                       | -                   | 1.5  | 2.0  | <1                           | 4.7                              | 2.2                 | 9.3                 |
| Calcium carbide – CaC <sub>2</sub> | -                   | <1   | -    | traces                       | 1.2                              | <1                  | -                   |
| Aragonite – CaCO <sub>3</sub>      | -                   | -    | 1.5  | -                            | 1.6                              | -                   | -                   |
| Vaterite – CaCO <sub>3</sub>       | -                   | -    | 12.8 | -                            | -                                | -                   | -                   |
| Fluorite – CaF <sub>2</sub>        | -                   | -    | 19.7 | -                            | -                                | -                   | 10.8                |
| CaO                                | -                   | -    | -    | -                            | <1                               | <1                  | 2.7                 |
|                                    |                     |      |      |                              |                                  |                     |                     |
| Rp (%)*                            | 8.4                 | 9.0  | 10.1 | 9.8                          | 8.7                              | 9.9                 | 9.7                 |

(\*)  $R_p = \frac{\sum |y_i^{obs} - y_i^{calc}|}{\sum y_i^{obs}}$  - is the factor of convergence of the calculated and experimental X-ray profiles,  $y_i$  is the intensity at each experimental point of the X-ray diffraction pattern.

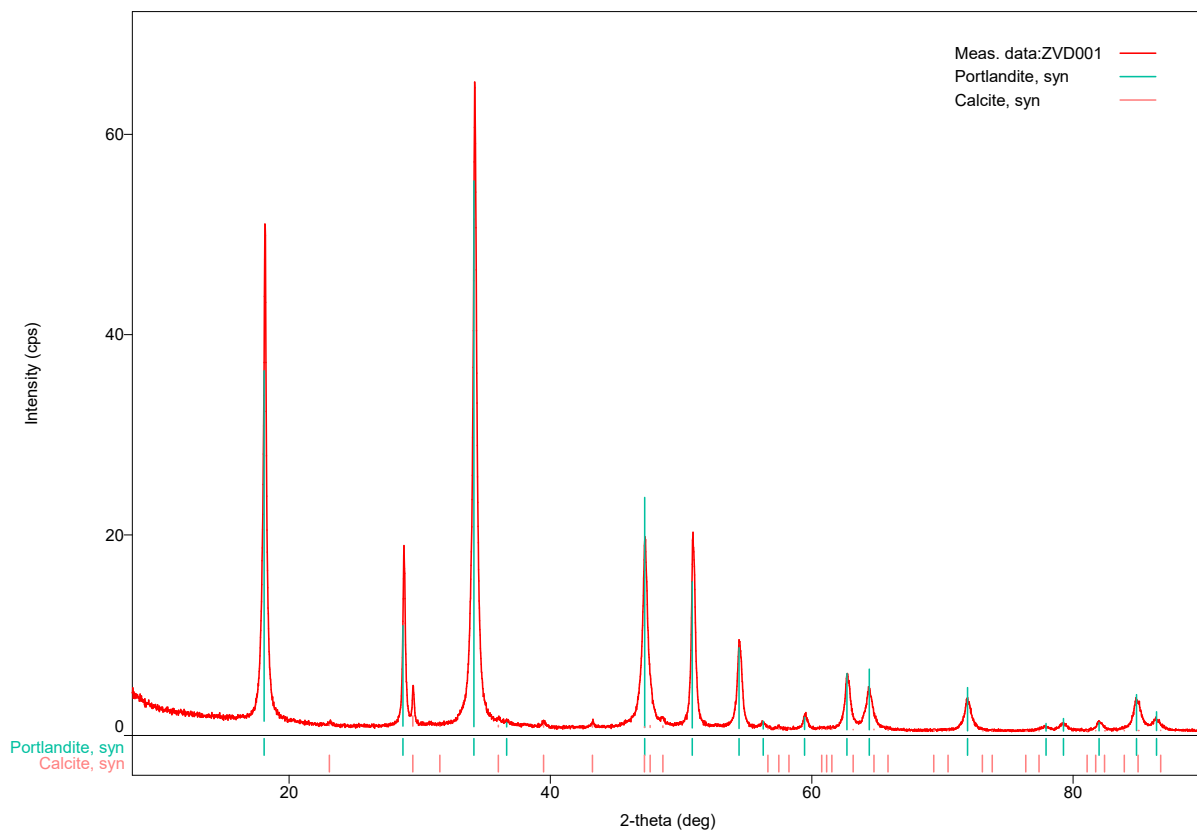

**Figure S3.** X-ray pattern of  $\text{Ca}(\text{OH})_2$

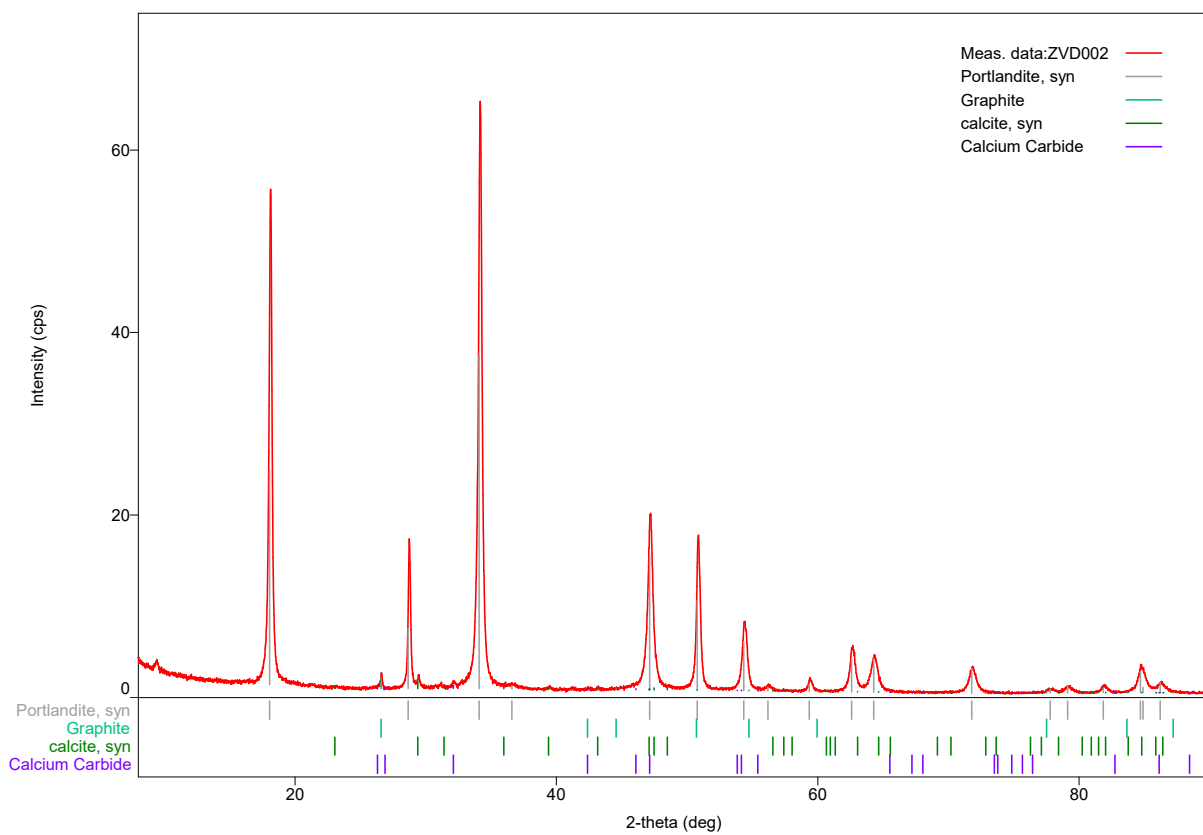

**Figure S4.** X-ray pattern of CCR1



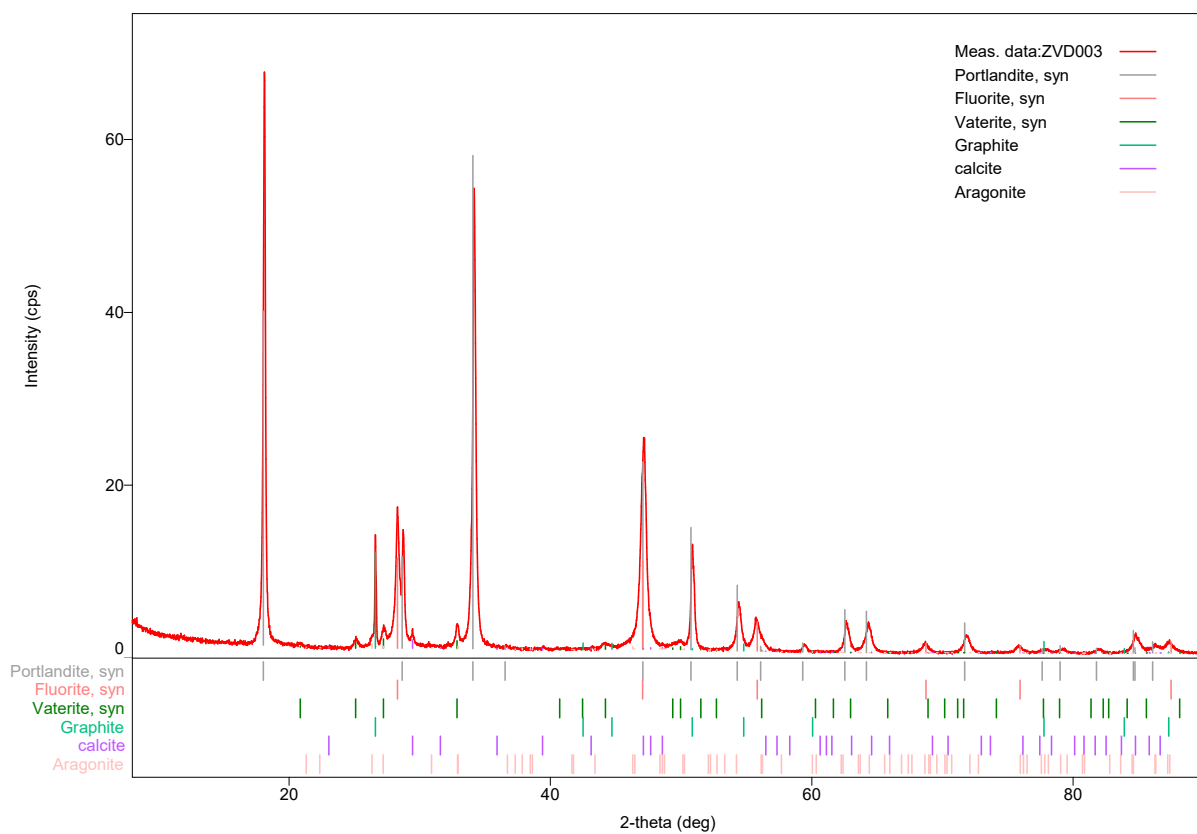

**Figure S5.** X-ray pattern of CCR2

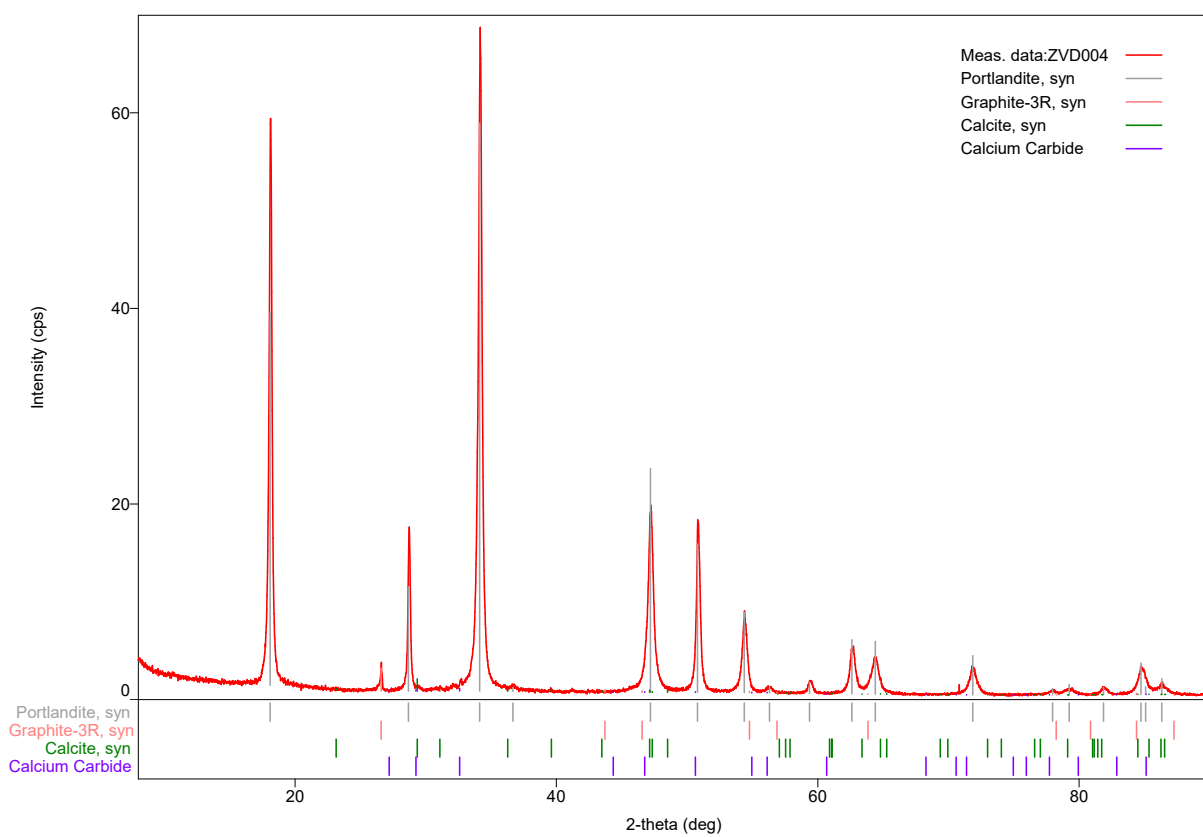

**Figure S6.** X-ray pattern of CCR1-d<sub>2</sub> (dried in air)

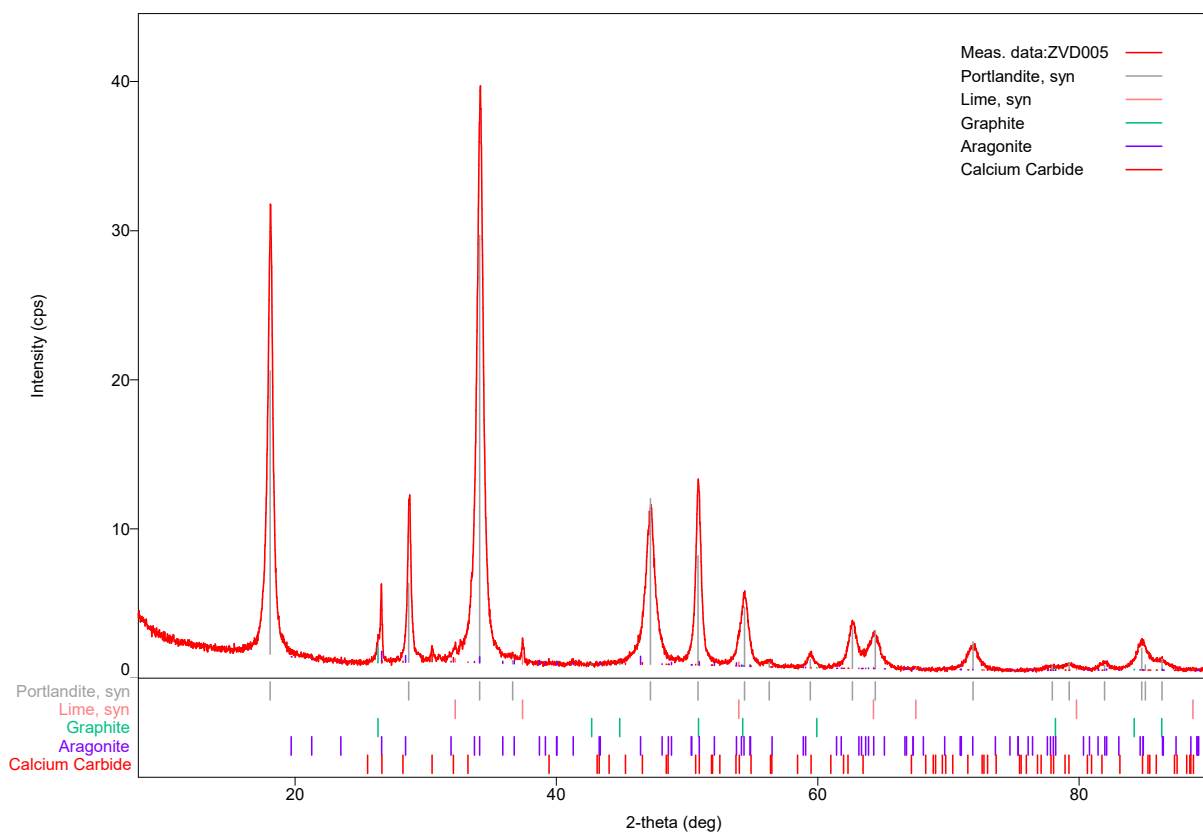

**Figure S7.** X-ray pattern of CCR2-d<sub>2</sub> (dried in vacuum)

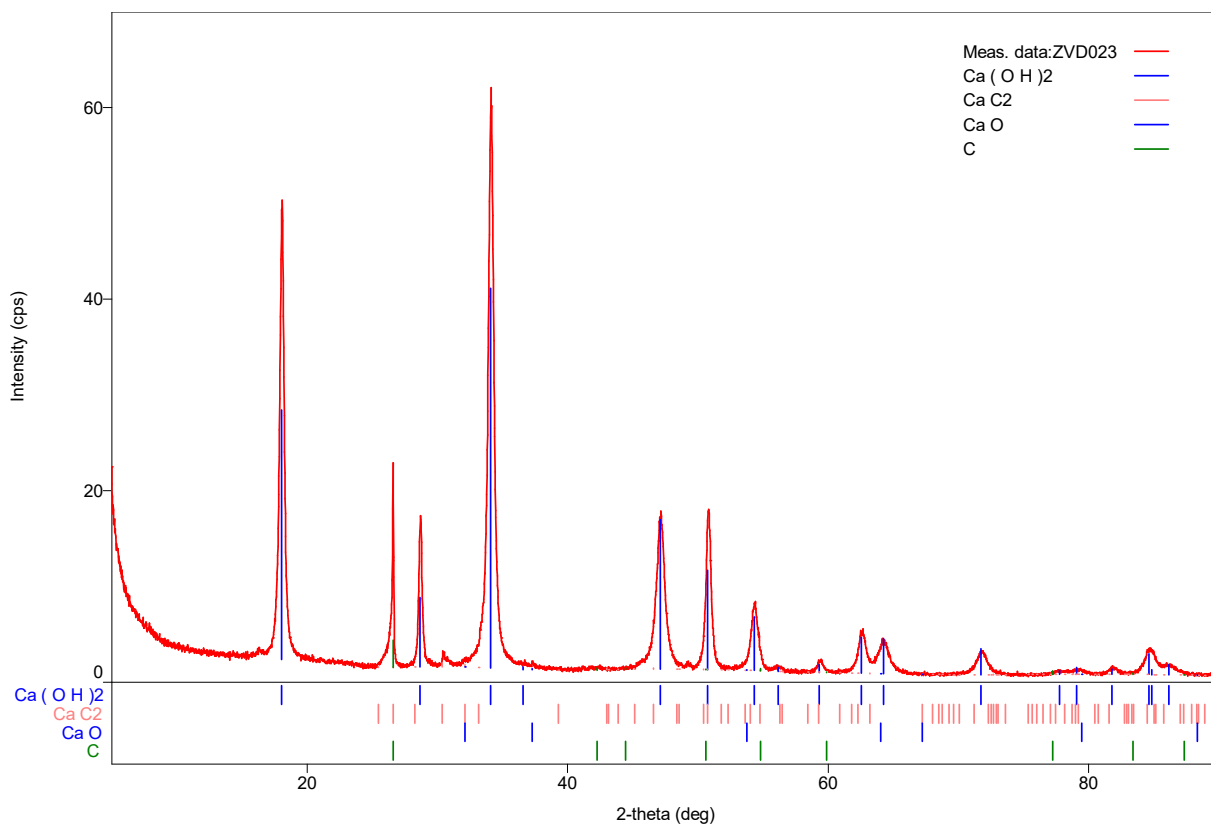

**Figure S8.** X-ray pattern of CCR2-d<sub>2</sub>

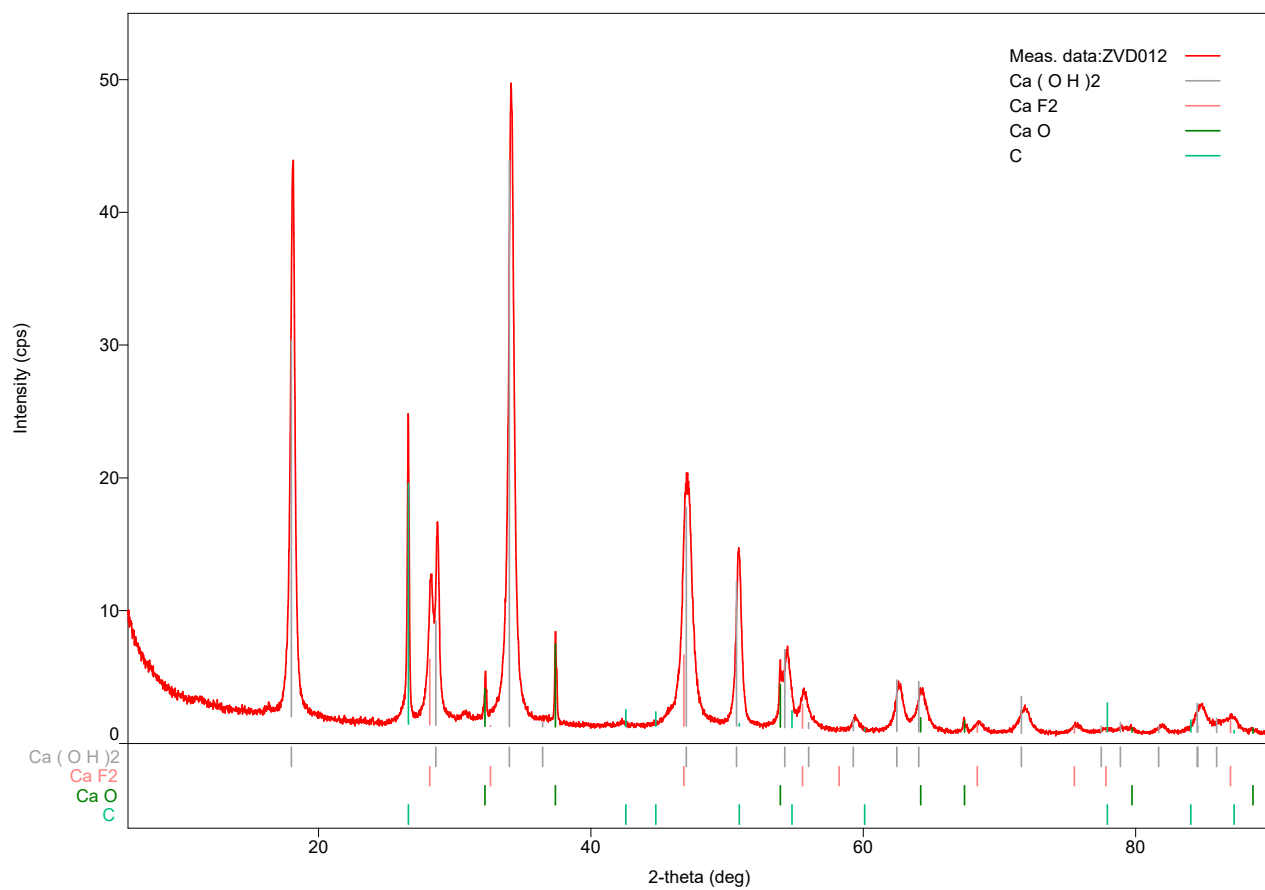

**Figure S9.** X-ray pattern of CCR3-d<sub>2</sub>

## S5. NMR spectra

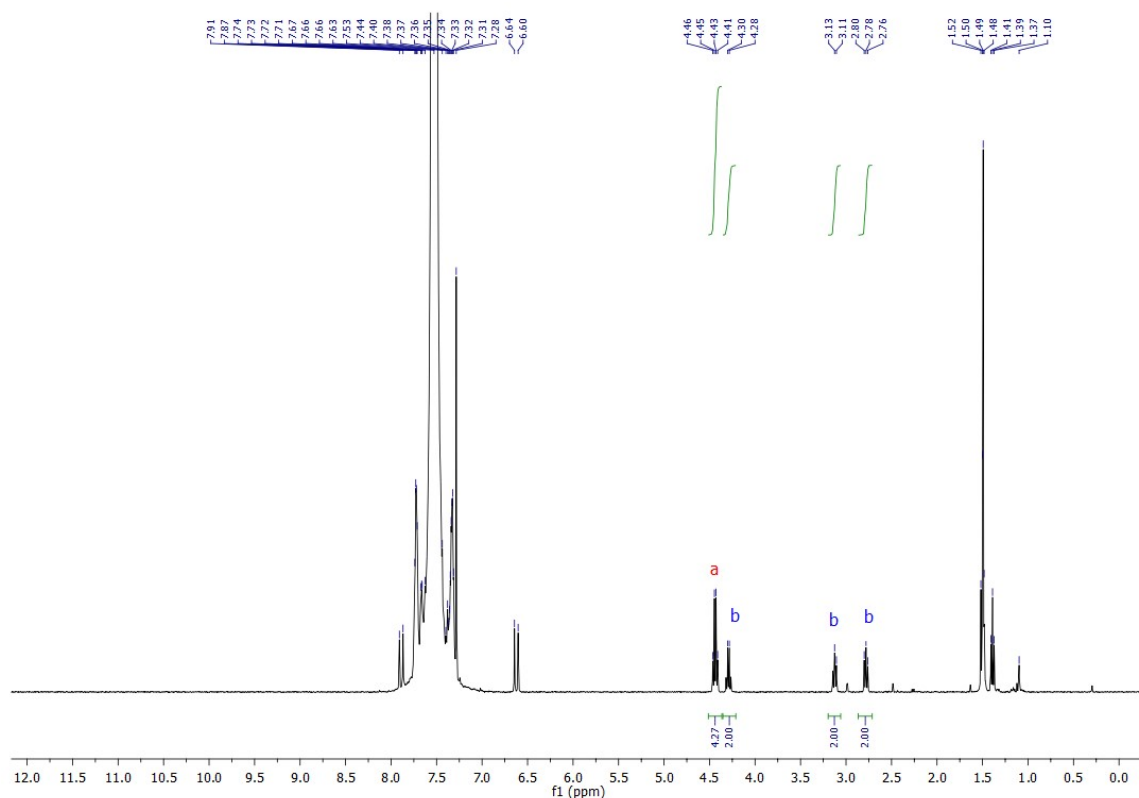

**Figure S10.** <sup>1</sup>H NMR (400 MHz, CDCl<sub>3</sub>) spectrum of the reaction mixture after hydrogenation of **1** using Ca(OH)<sub>2</sub> and Zn to generate hydrogen (1st part, after 45 minutes): a - the signal of the initial substance, b - the signals of the product

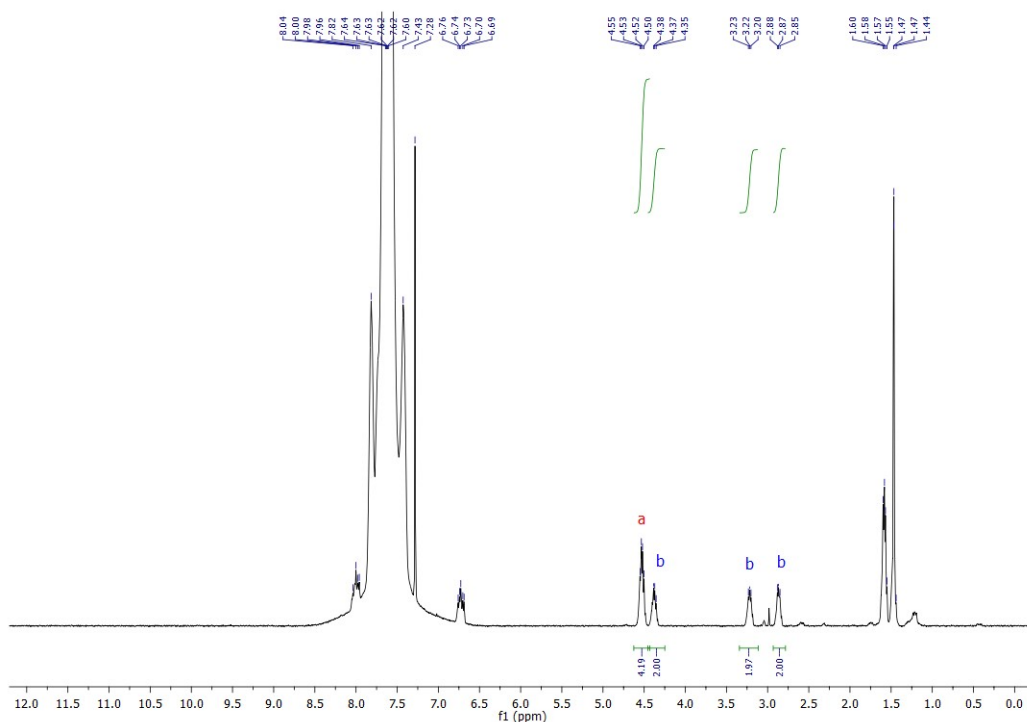

**Figure S11.** <sup>1</sup>H NMR (400 MHz, CDCl<sub>3</sub>) spectrum of the reaction mixture after hydrogenation of **1** using Ca(OH)<sub>2</sub> and Zn to generate hydrogen (1st part, after 90 minutes): a - the signal of the initial substance, b - the signals of the product

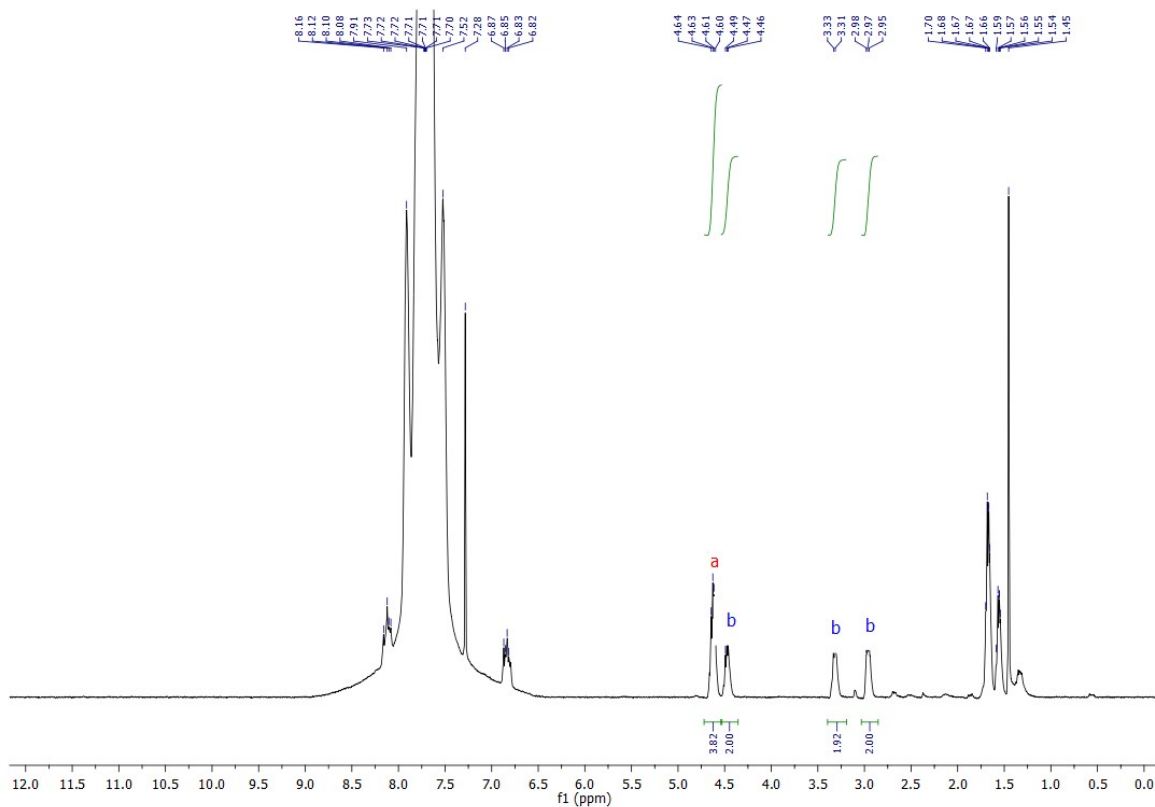

**Figure S12.**  $^1\text{H}$  NMR (400 MHz,  $\text{CDCl}_3$ ) spectrum of the reaction mixture after hydrogenation of **1** using  $\text{Ca}(\text{OH})_2$  and Zn to generate hydrogen (2nd part, after 45 minutes): a - the signal of the initial substance, b - the signals of the product

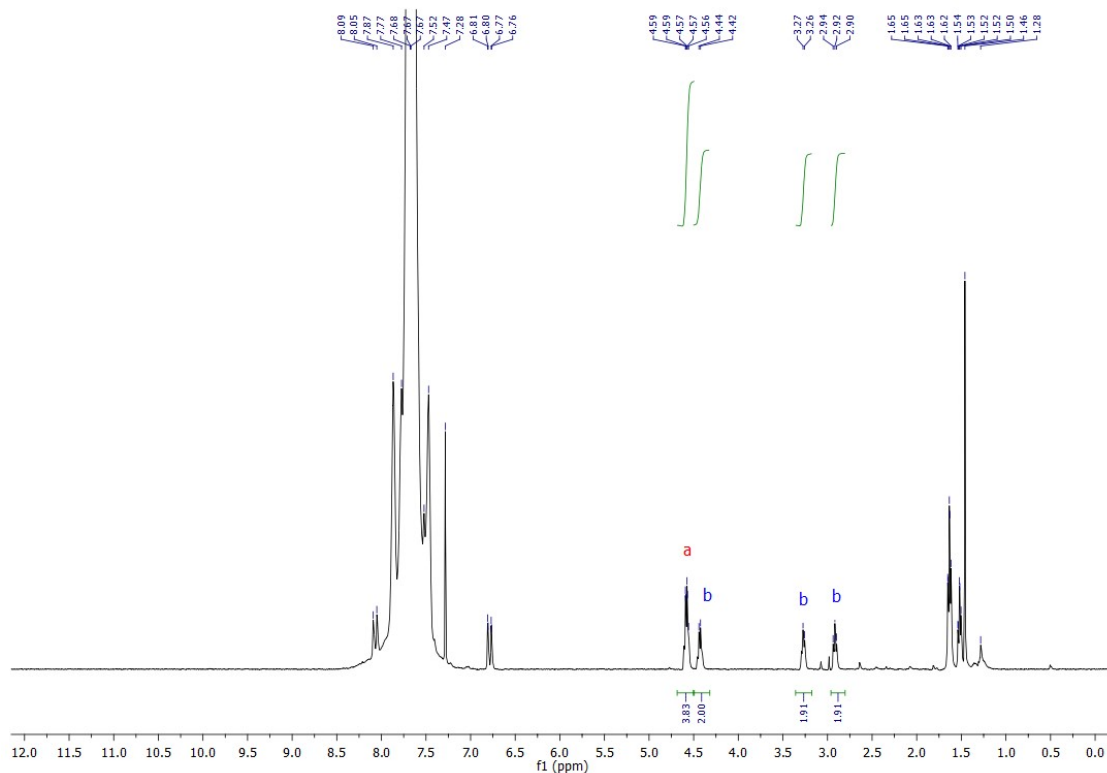

**Figure S13.**  $^1\text{H}$  NMR (400 MHz,  $\text{CDCl}_3$ ) spectrum of the reaction mixture after hydrogenation of **1** using  $\text{Ca}(\text{OH})_2$  and Zn to generate hydrogen (2nd part, after 90 minutes): a - the signal of the initial substance, b - the signals of the product

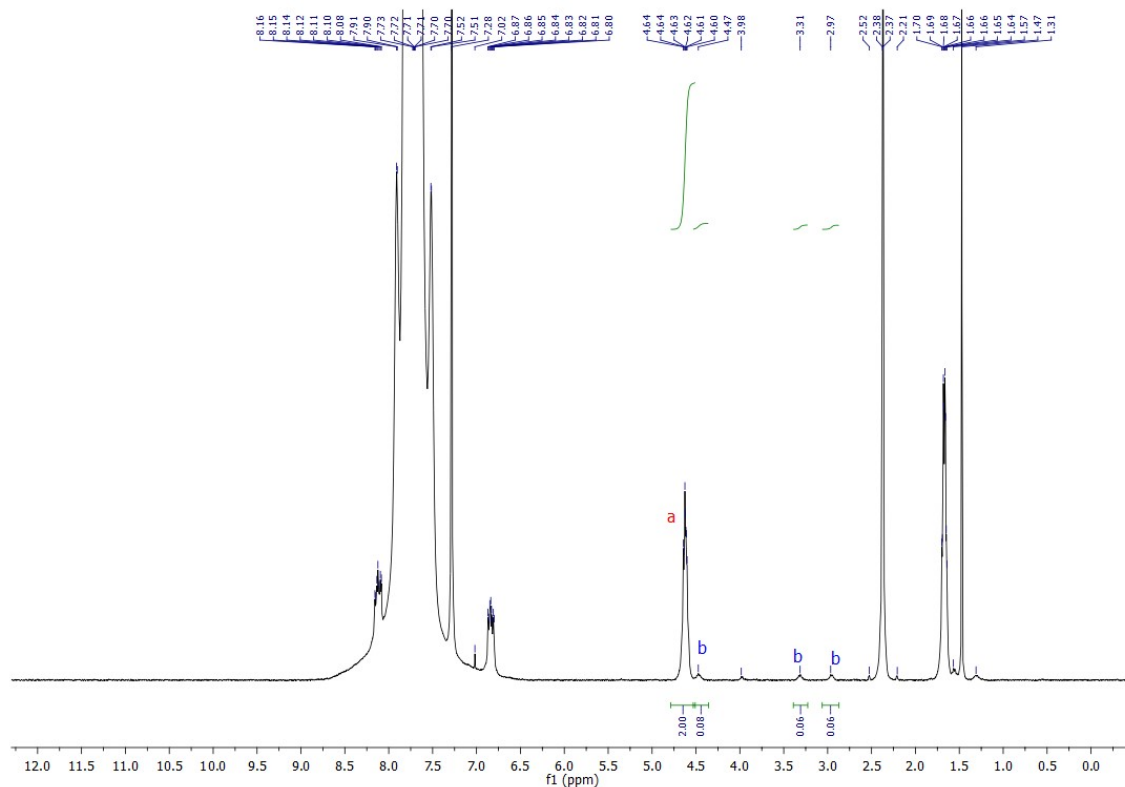

**Figure S14.**  $^1\text{H}$  NMR (400 MHz,  $\text{CDCl}_3$ ) spectrum of the reaction mixture after hydrogenation of **1** using CCR1 and Zn to generate hydrogen (1st part, after 45 minutes): a - the signal of the initial substance, b - the signals of the product

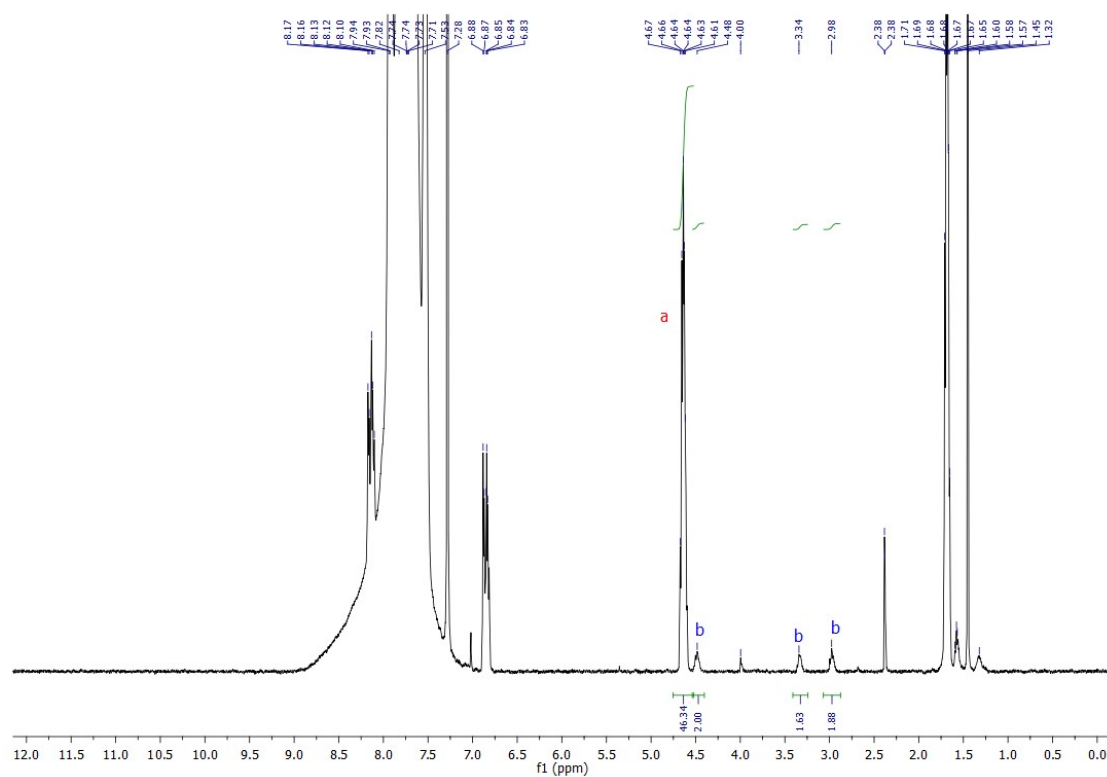

**Figure S15.**  $^1\text{H}$  NMR (400 MHz,  $\text{CDCl}_3$ ) spectrum of the reaction mixture after hydrogenation of **1** using CCR2 and Zn to generate hydrogen (1st part, after 45 minutes): a - the signal of the initial substance, b - the signals of the product

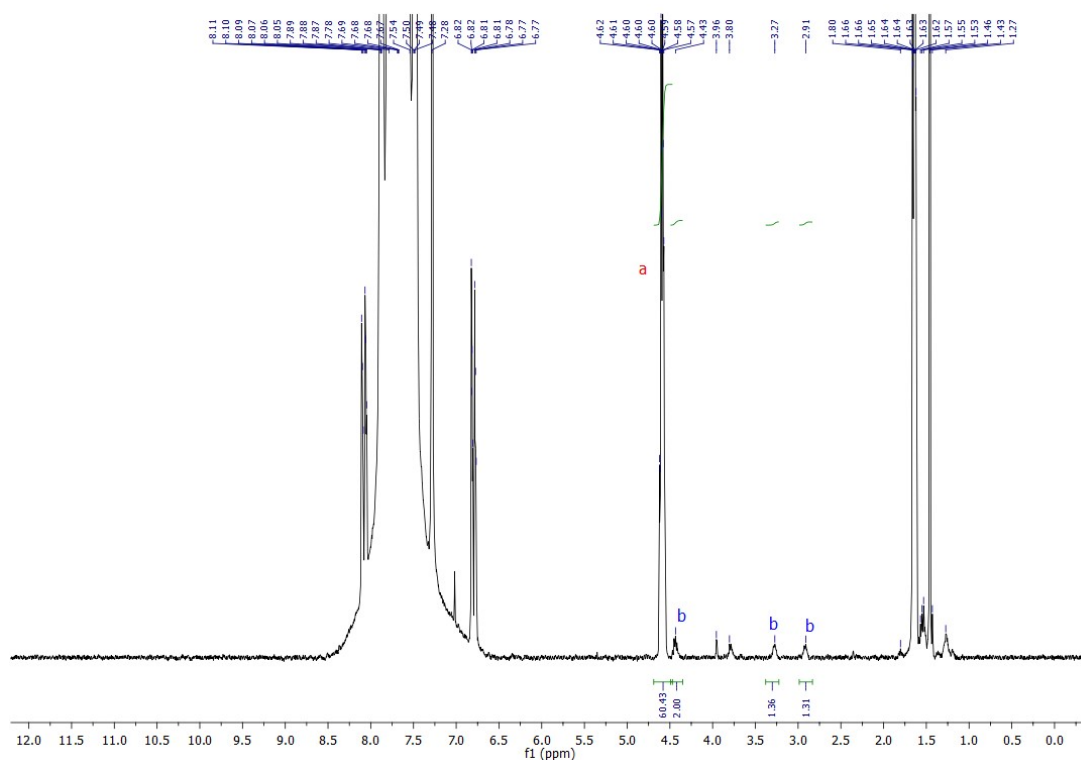

**Figure S16.**  $^1\text{H}$  NMR (400 MHz,  $\text{CDCl}_3$ ) spectrum of the reaction mixture after hydrogenation of **1** using  $\text{CCR1-d}_2$  (air) and Zn to generate hydrogen (1st part, after 45 minutes): a - the signal of the initial substance, b - the signals of the product

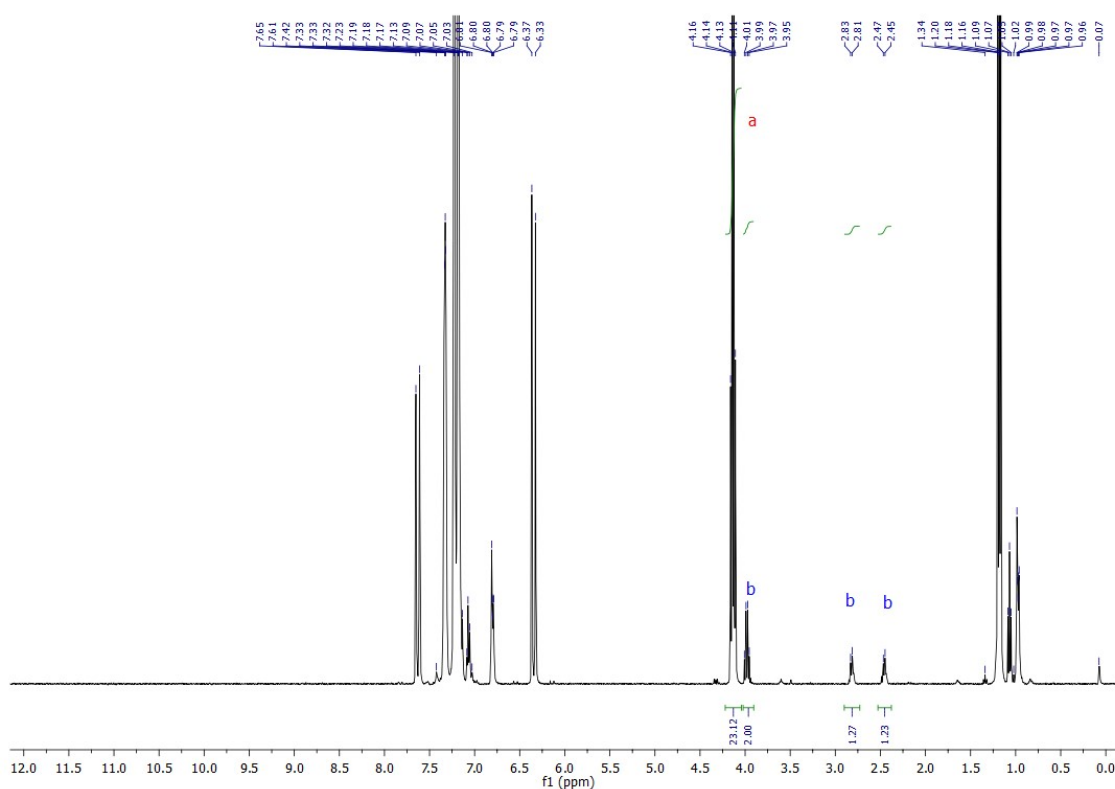

**Figure S17.**  $^1\text{H}$  NMR (400 MHz,  $\text{CDCl}_3$ ) spectrum of the reaction mixture after hydrogenation of **1** using  $\text{CCR1-d}_2$  (air) and Zn to generate hydrogen (1st part, after 45 minutes, using benzene- $\text{d}_6$  and dry catalyst): a - the signal of the initial substance, b - the signals of the product

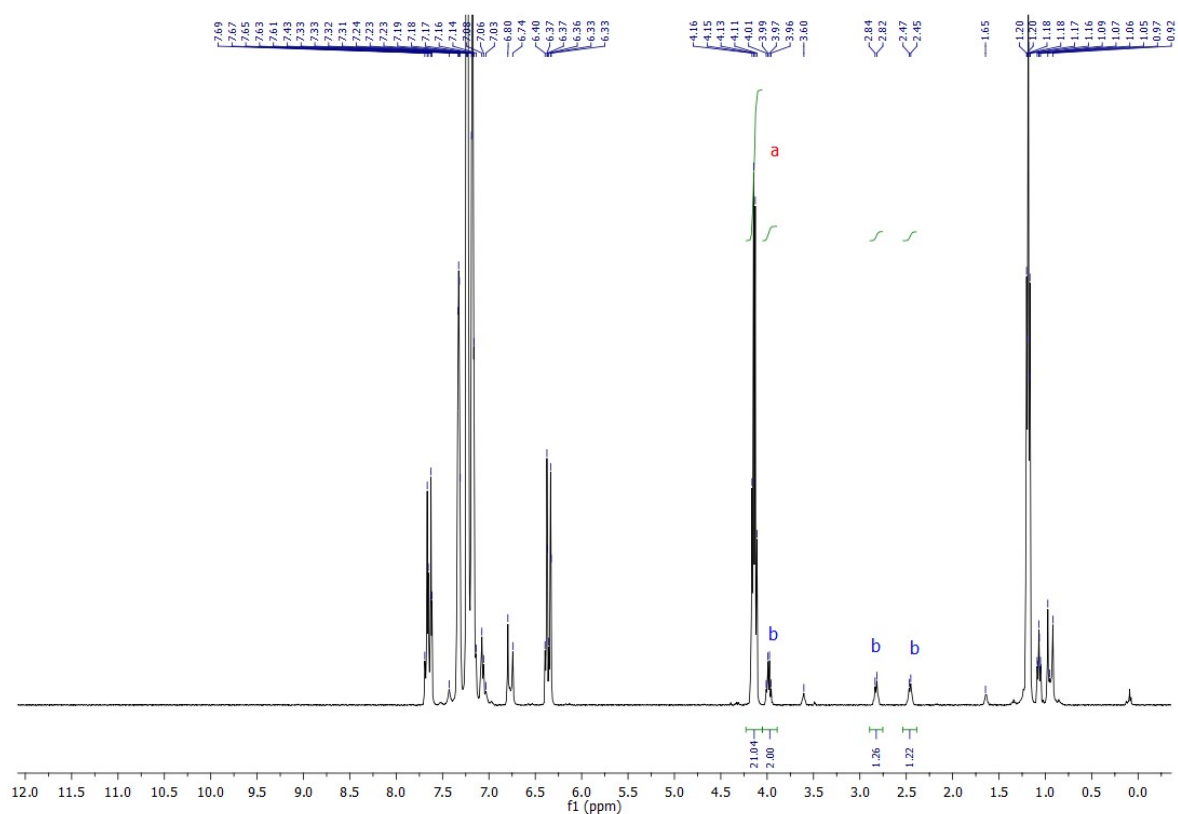

**Figure S18.** <sup>1</sup>H NMR (400 MHz, CDCl<sub>3</sub>) spectrum of the reaction mixture after hydrogenation of **1** using CCR1-*d*<sub>2</sub> (air) and Zn to generate hydrogen (2nd part, after 45 minutes, using benzene-*d*<sub>6</sub> and dry catalyst): a - the signal of the initial substance, b - the signals of the product

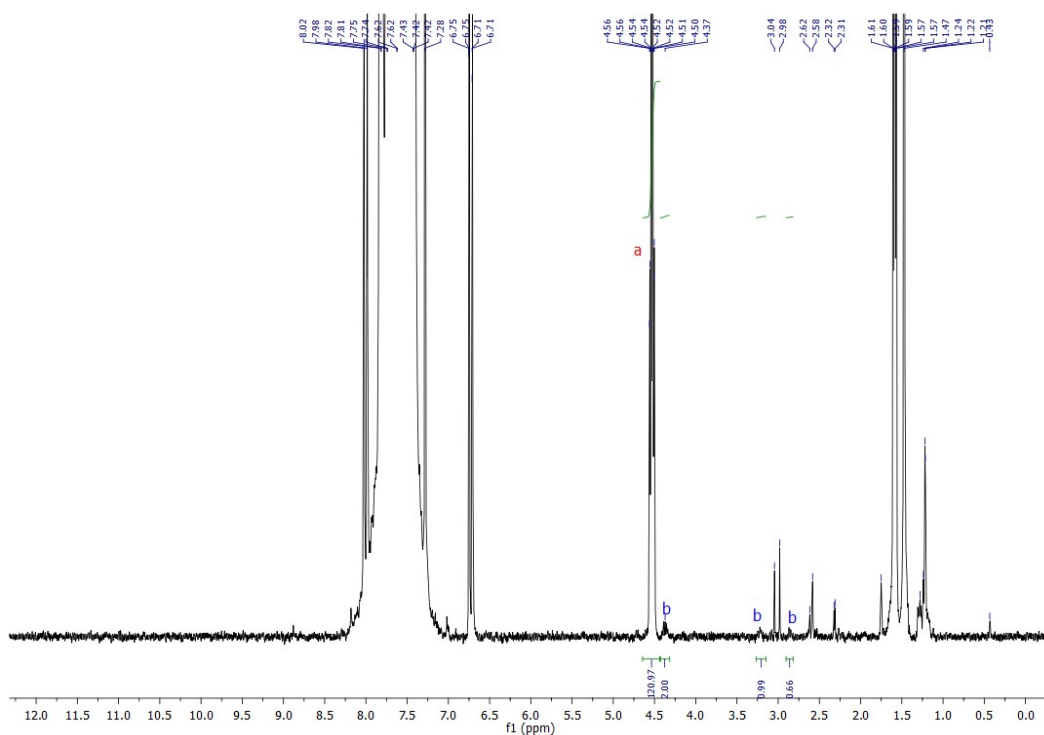

**Figure S19.** <sup>1</sup>H NMR (400 MHz, CDCl<sub>3</sub>) spectrum of the reaction mixture after hydrogenation of **1** using CCR1-*d*<sub>2</sub> (dioxane) and Zn to generate hydrogen (1st part, after 45 minutes): a - the signal of the initial substance, b - the signals of the product



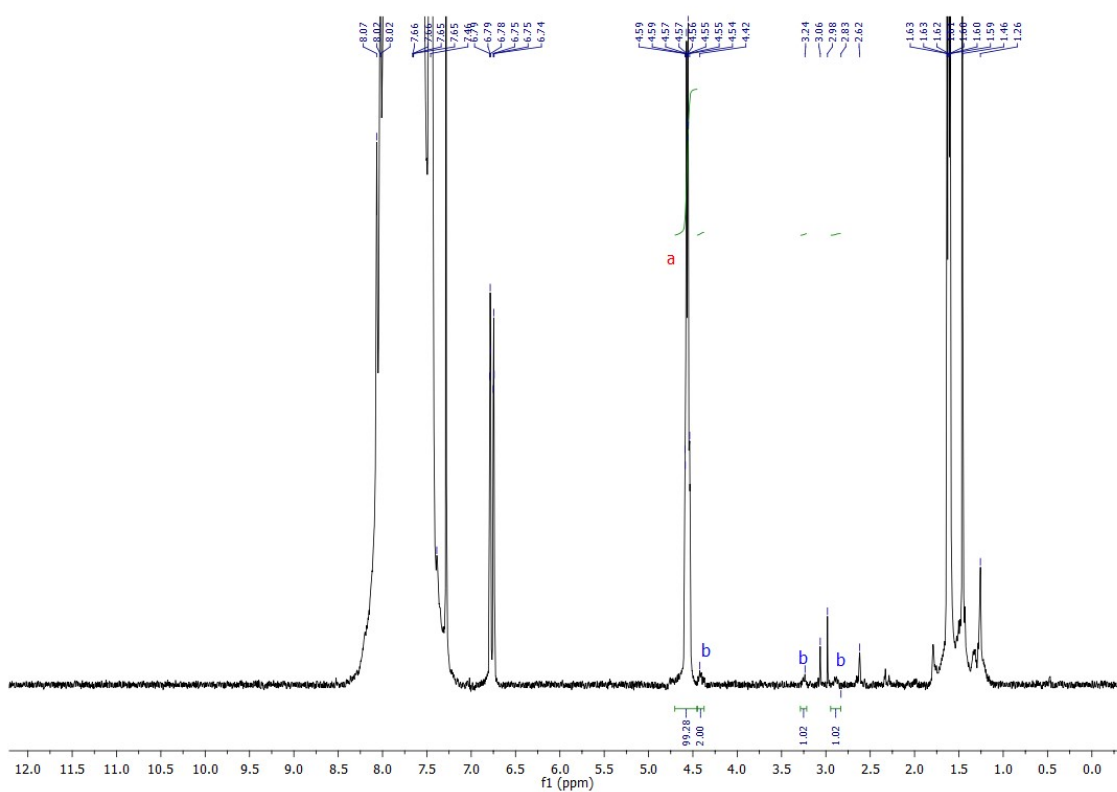

**Figure S20.**  $^1\text{H}$  NMR (400 MHz,  $\text{CDCl}_3$ ) spectrum of the reaction mixture after hydrogenation of **1** using  $\text{CCR1-d}_2$  (dioxane) and Zn to generate hydrogen (2nd part, after 45 minutes): a - the signal of the initial substance, b - the signals of the product

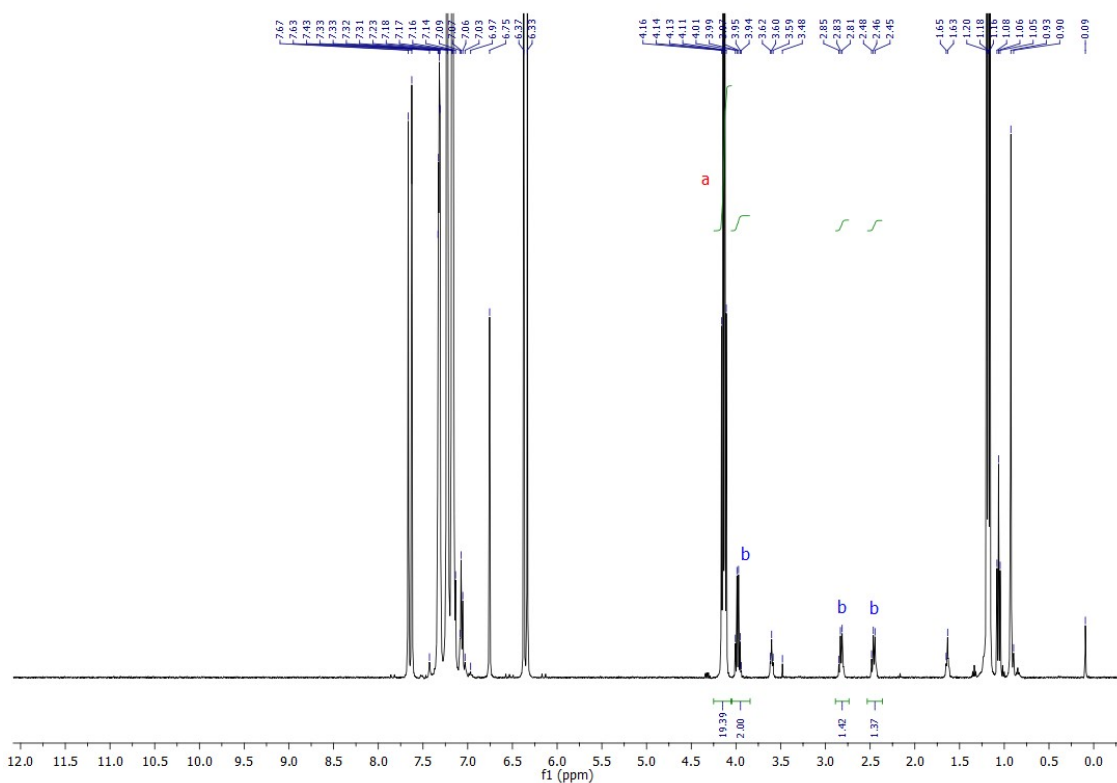

**Figure S21.**  $^1\text{H}$  NMR (400 MHz,  $\text{CDCl}_3$ ) spectrum of the reaction mixture after hydrogenation of **1** using  $\text{CCR1-d}_2$  (dioxane) and Zn to generate hydrogen (1st part, after 45 minutes using benzene- $\text{d}_6$  and dry catalyst): a - the signal of the initial substance, b - the signals of the product

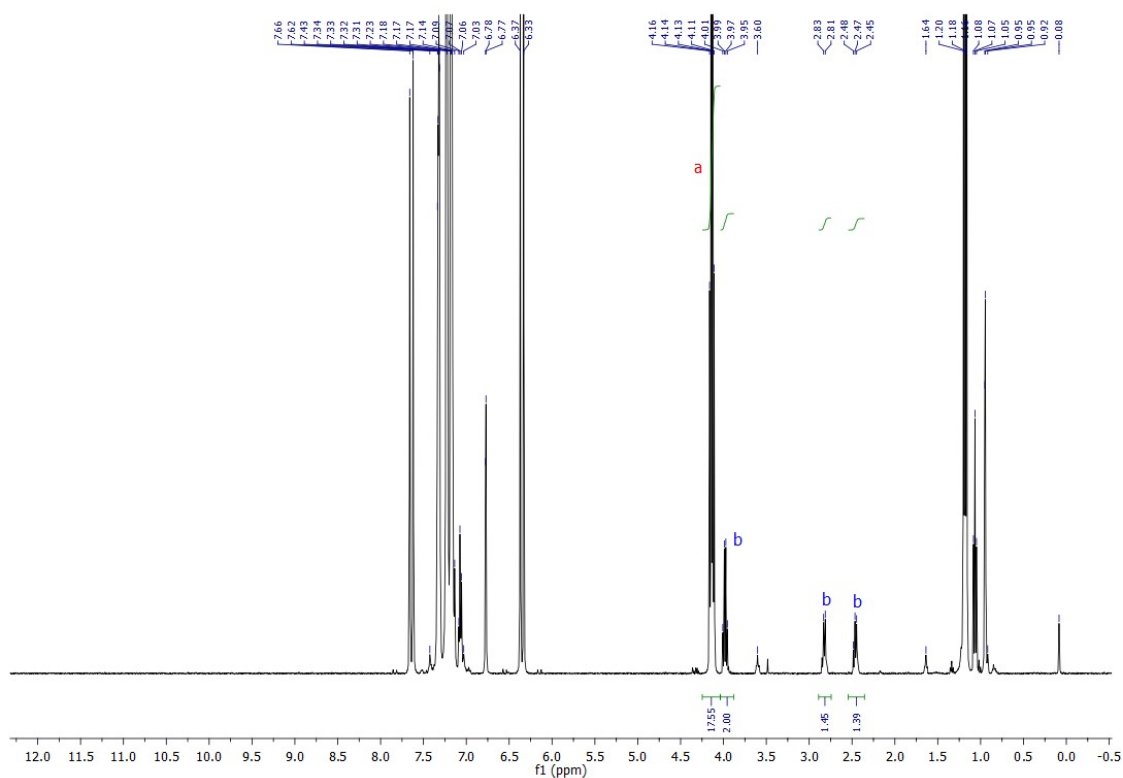

**Figure S22.**  $^1\text{H}$  NMR (400 MHz,  $\text{CDCl}_3$ ) spectrum of the reaction mixture after hydrogenation of **1** using CCR1- $d_2$  (dioxane) and Zn to generate hydrogen (2nd part, after 45 minutes using benzene- $d_6$  and dry catalyst): a - the signal of the initial substance, b - the signals of the product

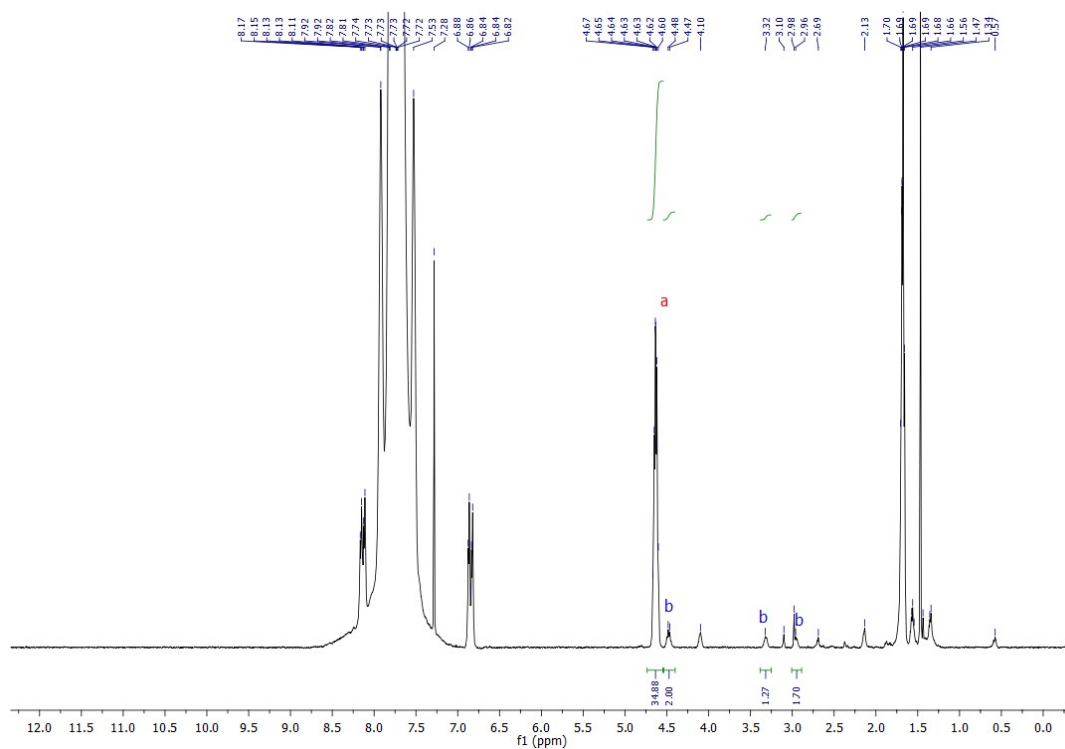

**Figure S23.**  $^1\text{H}$  NMR (400 MHz,  $\text{CDCl}_3$ ) spectrum of the reaction mixture after hydrogenation of **1** using CCR2- $d_2$  and Zn to generate hydrogen (1st part, after 45 minutes): a - the signal of the initial substance, b - the signals of the product

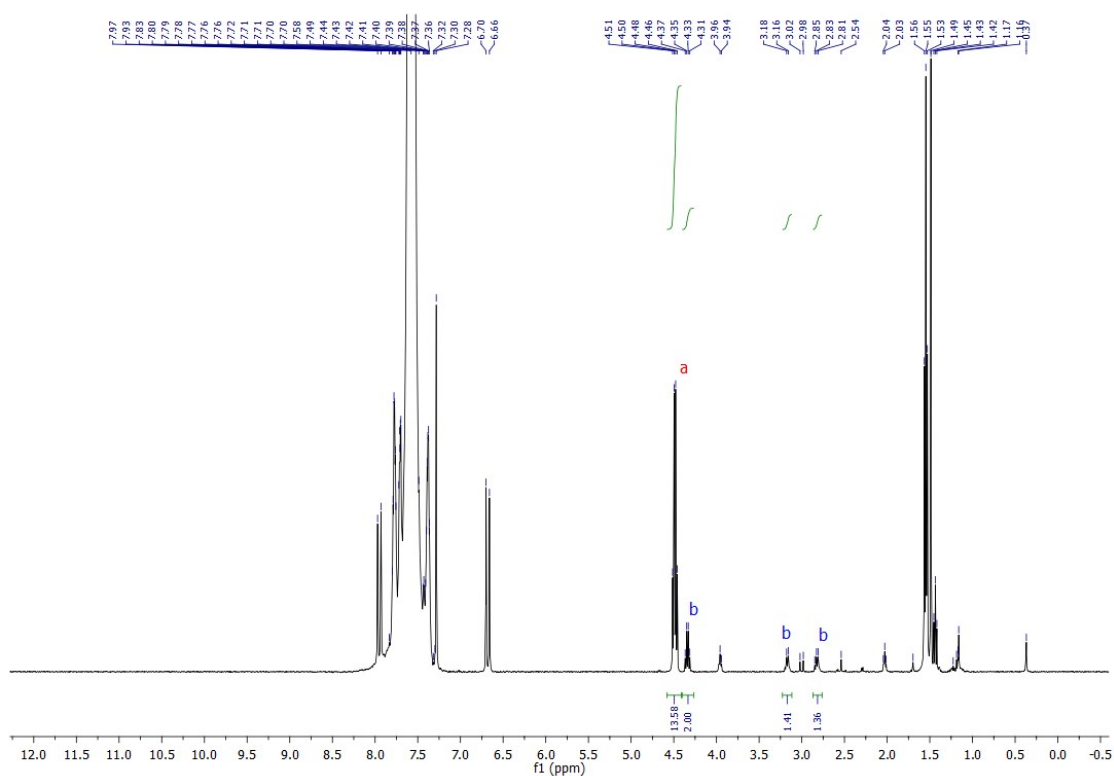

**Figure S24.**  $^1\text{H}$  NMR (400 MHz,  $\text{CDCl}_3$ ) spectrum of the reaction mixture after hydrogenation of **1** using  $\text{CCR2-}d_2$  and Zn to generate hydrogen (2nd part, after 45 minutes): a - the signal of the initial substance, b - the signals of the product

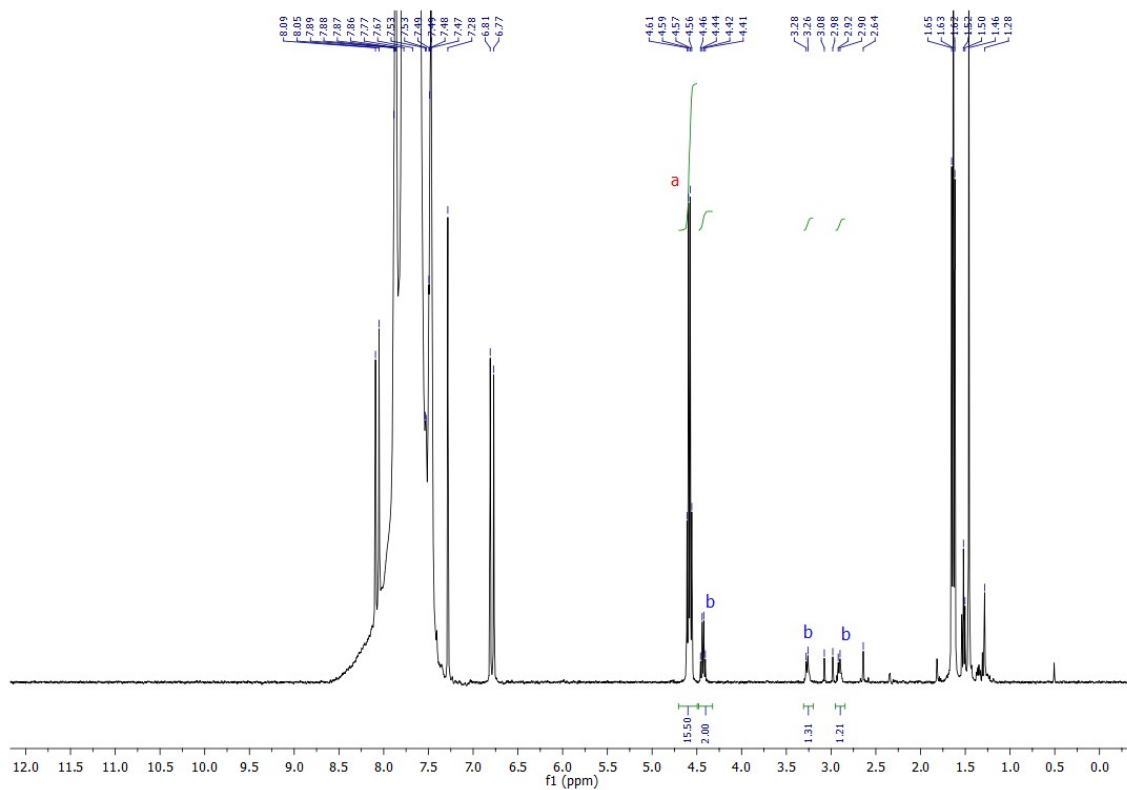

**Figure S25.**  $^1\text{H}$  NMR (400 MHz,  $\text{CDCl}_3$ ) spectrum of the reaction mixture after hydrogenation of **1** using  $\text{CCR3-}d_2$  and Zn to generate hydrogen (2nd part, after 45 minutes): a - the signal of the initial substance, b - the signals of the product

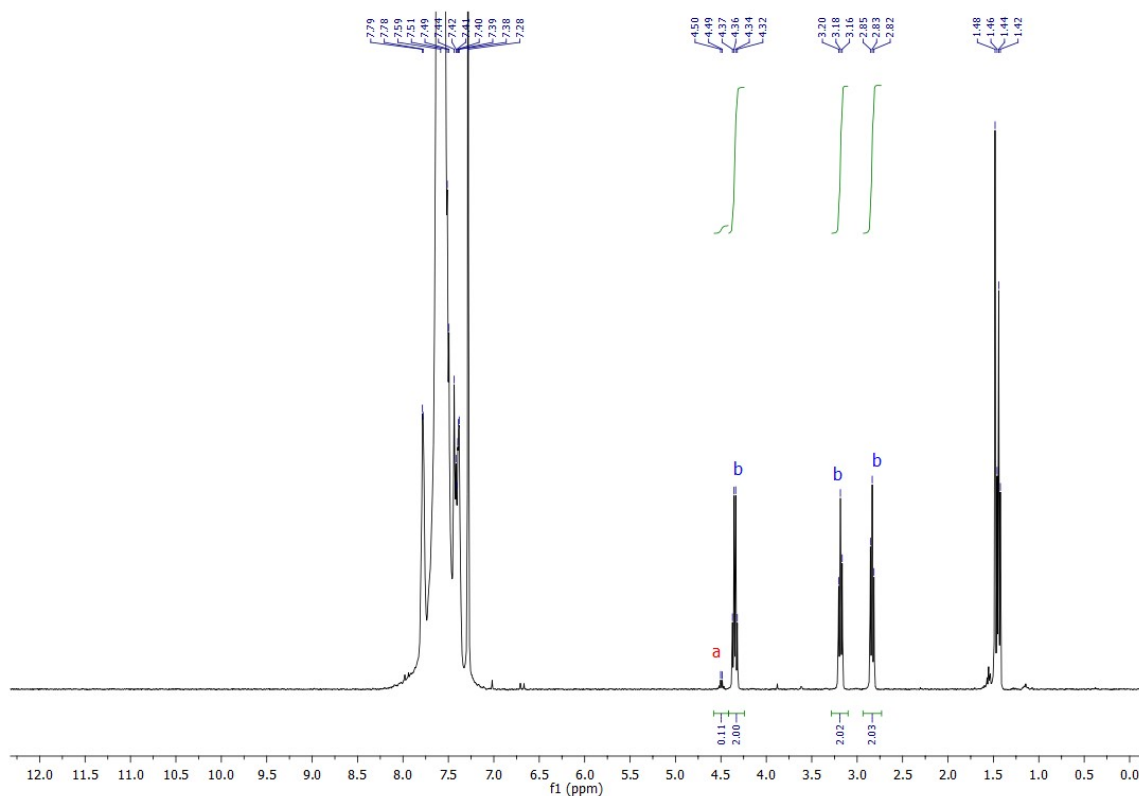

**Figure S26.**  $^1\text{H}$  NMR (400 MHz,  $\text{CDCl}_3$ ) spectrum of the reaction mixture after hydrogenation of **1** using  $\text{Ca}(\text{OH})_2$  and  $\text{Ca}$  to generate hydrogen (1st part, after 45 minutes): a - the signal of the initial substance, b - the signals of the product

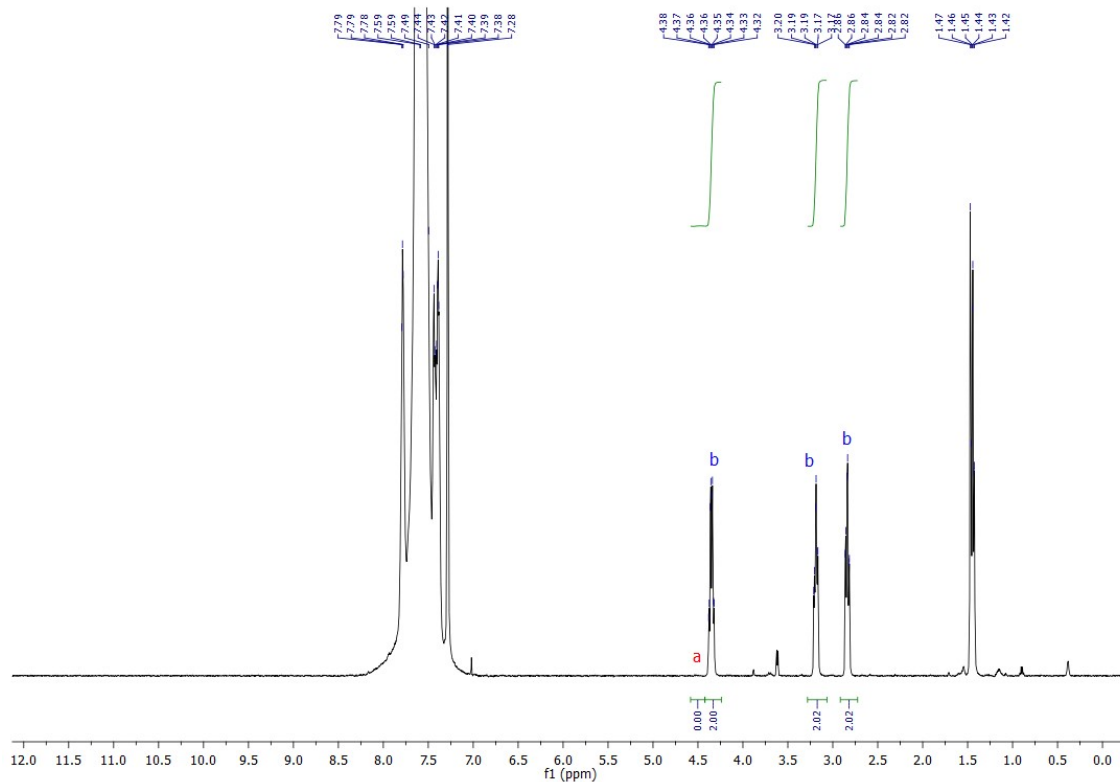

**Figure S27.**  $^1\text{H}$  NMR (400 MHz,  $\text{CDCl}_3$ ) spectrum of the reaction mixture after hydrogenation of **1** using CCR1 and  $\text{Ca}$  to generate hydrogen (1st part, after 45 minutes): a - the signal of the initial substance, b - the signals of the product

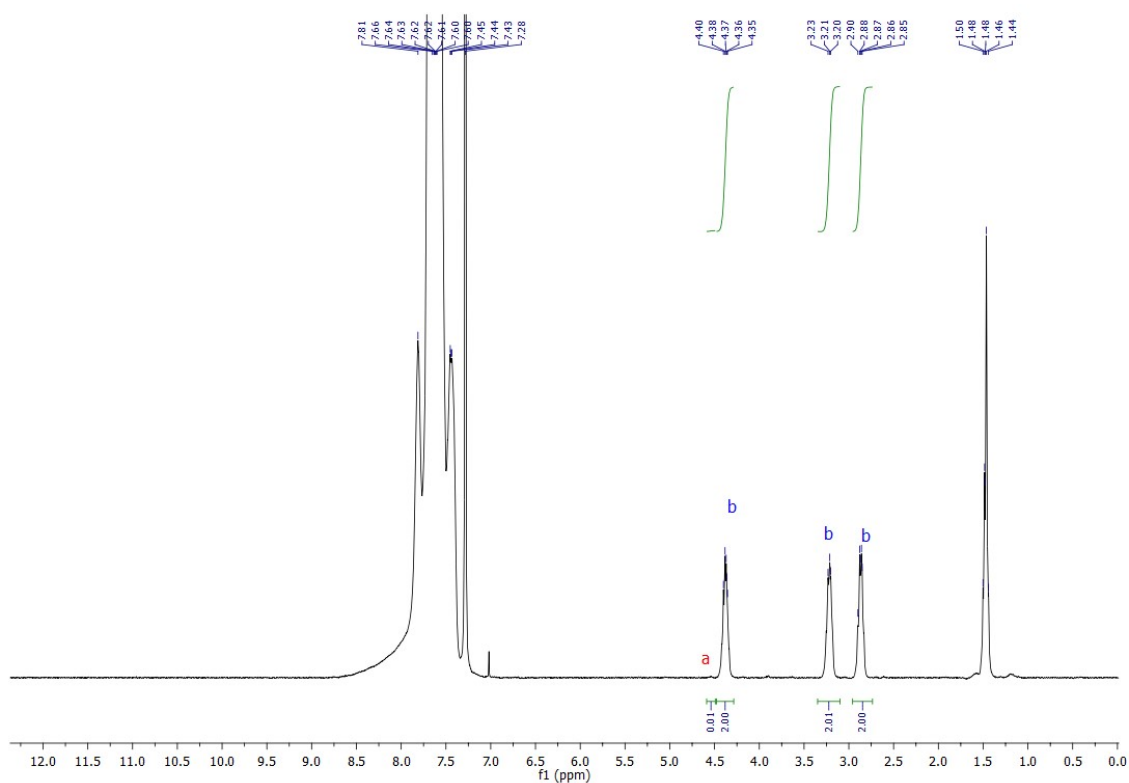

**Figure S28.**  $^1\text{H}$  NMR (400 MHz,  $\text{CDCl}_3$ ) spectrum of the reaction mixture after hydrogenation of **1** using CCR2 and Ca to generate hydrogen (1st part, after 45 minutes): a - the signal of the initial substance, b - the signals of the product

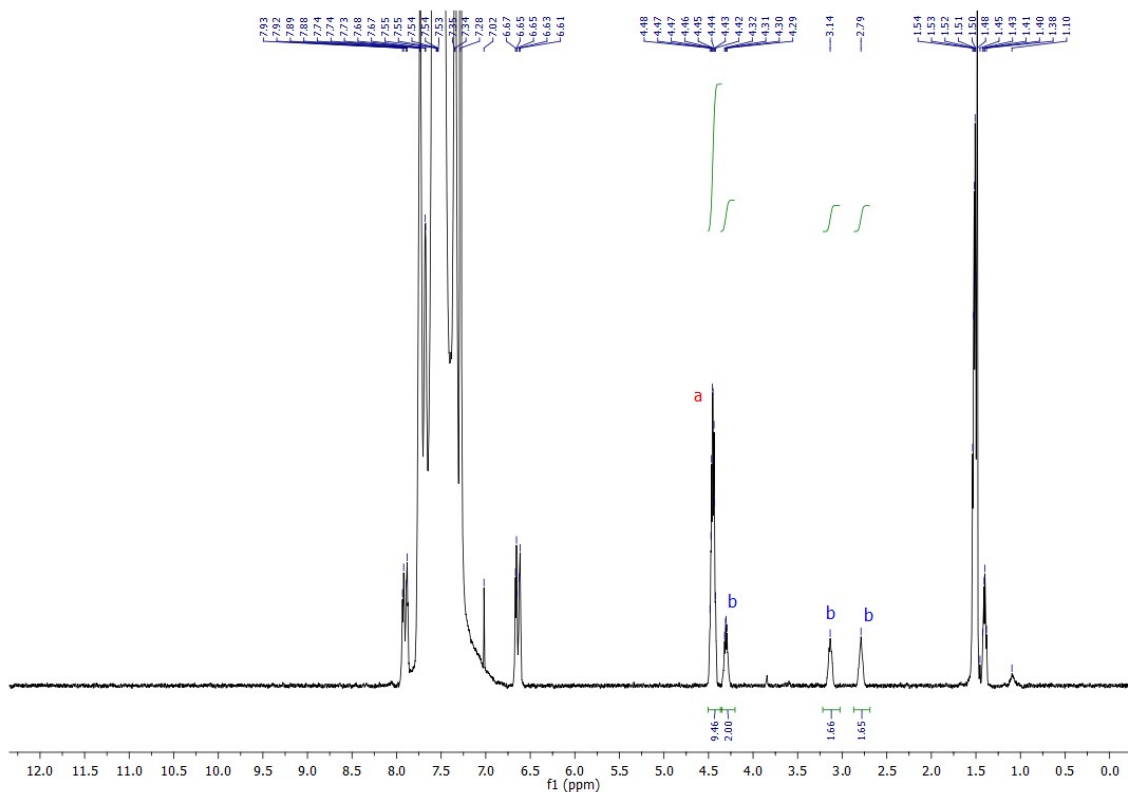

**Figure S29.**  $^1\text{H}$  NMR (400 MHz,  $\text{CDCl}_3$ ) spectrum of the reaction mixture after hydrogenation of **1** using CCR1- $d_2$  (air) and Ca to generate hydrogen (1st part, after 45 minutes): a - the signal of the initial substance, b - the signals of the product

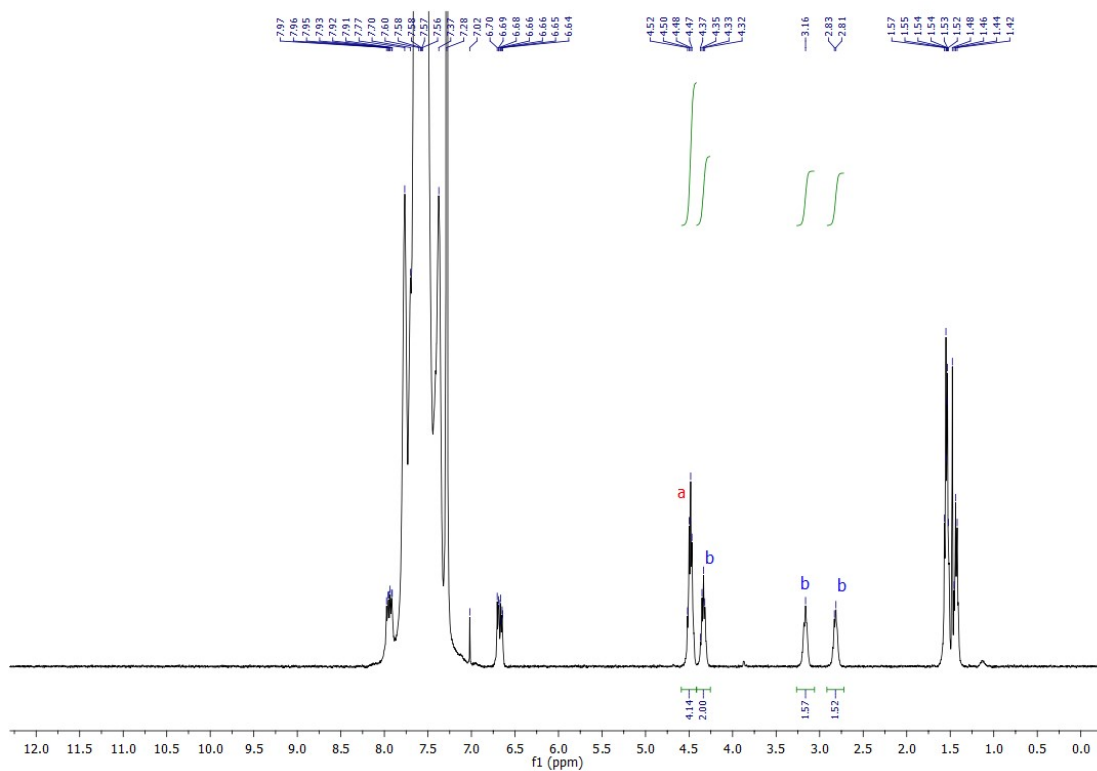

**Figure S30.**  $^1\text{H}$  NMR (400 MHz,  $\text{CDCl}_3$ ) spectrum of the reaction mixture after hydrogenation of **1** using CCR1- $d_2$  (air) and Ca to generate hydrogen (2nd part, after 45 minutes): a - the signal of the initial substance, b - the signals of the product

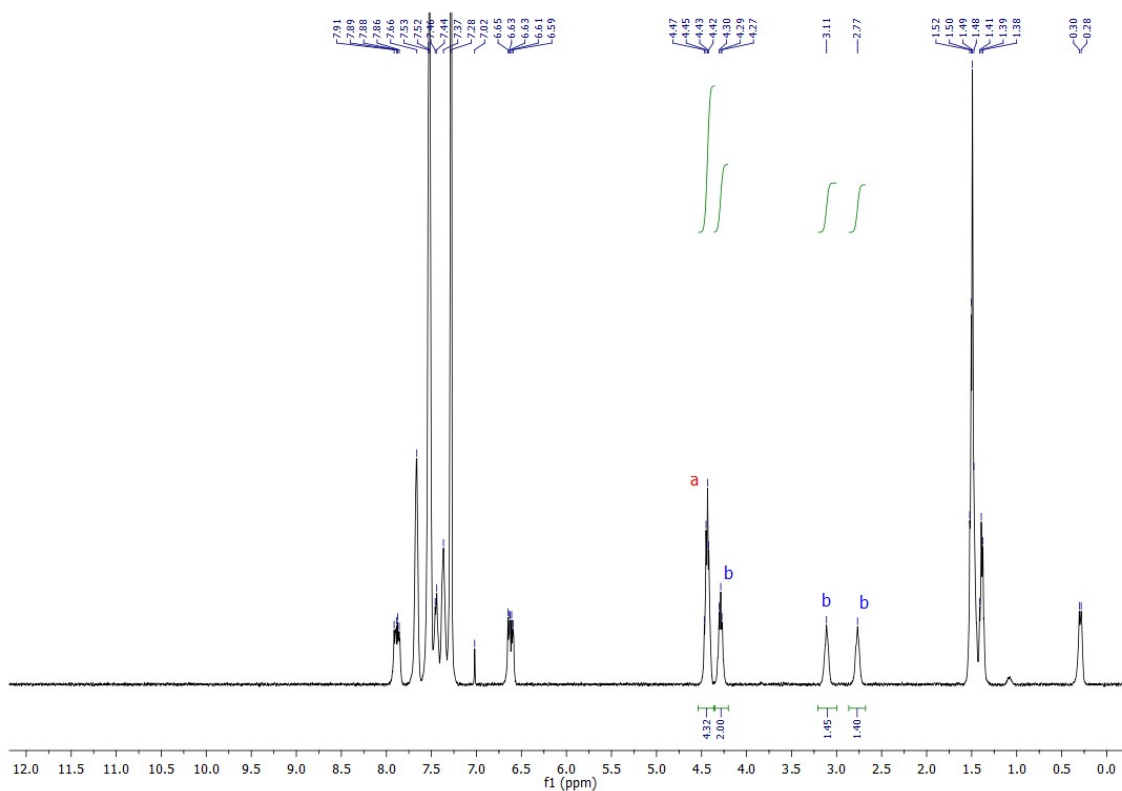

**Figure S31.**  $^1\text{H}$  NMR (400 MHz,  $\text{CDCl}_3$ ) spectrum of the reaction mixture after hydrogenation of **1** using CCR1- $d_2$  (air) and Ca to generate hydrogen (1st part, after 45 minutes, using benzene- $d_6$  and dry catalyst): a - the signal of the initial substance, b - the signals of the product

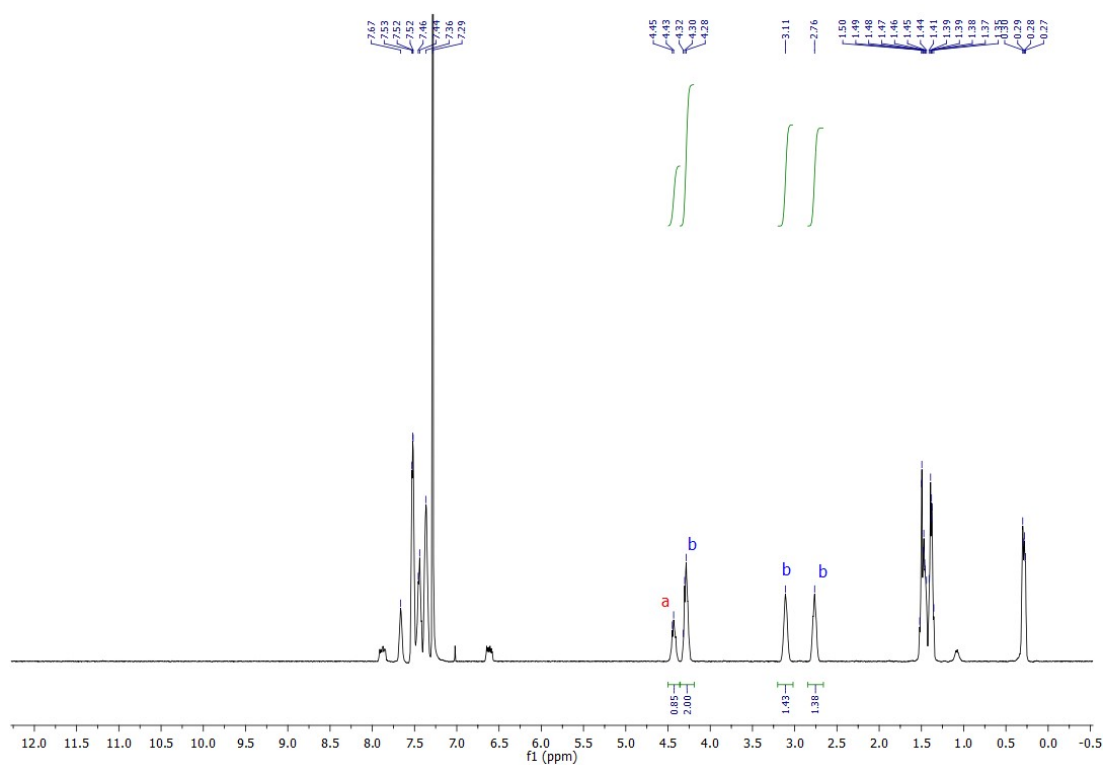

**Figure S32.**  $^1\text{H}$  NMR (400 MHz,  $\text{CDCl}_3$ ) spectrum of the reaction mixture after hydrogenation of **1** using  $\text{CCR1-d}_2$  (air) and Ca to generate hydrogen (2nd part, after 45 minutes, using benzene- $\text{d}_6$  and dry catalyst): a - the signal of the initial substance, b - the signals of the product

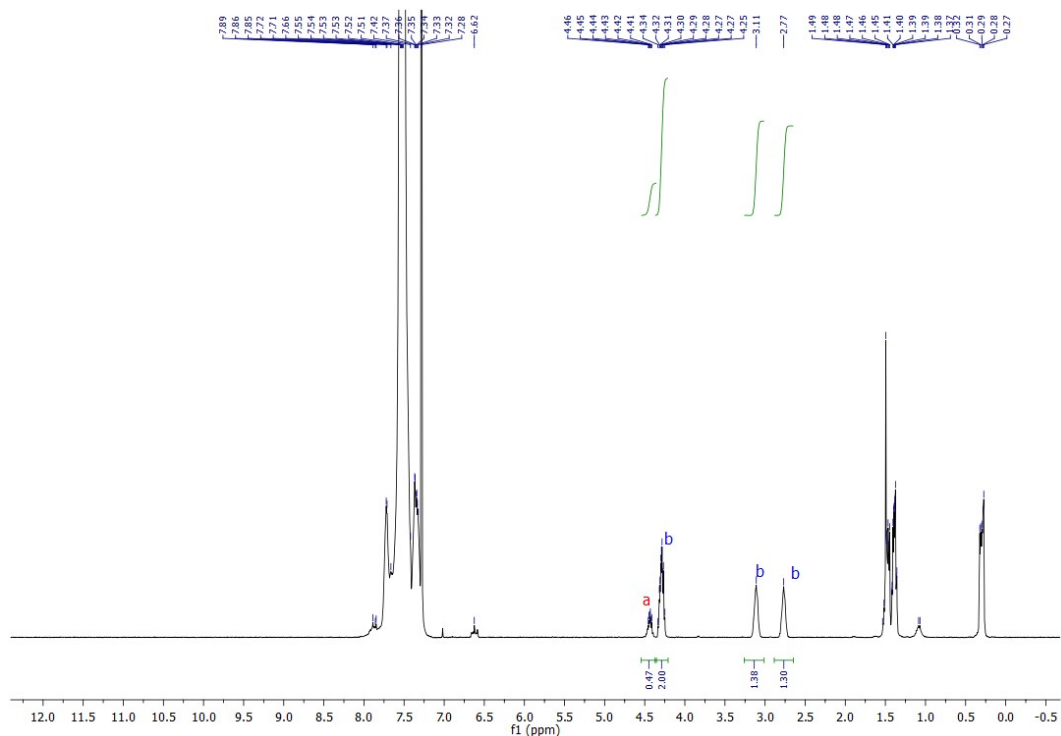

**Figure S33.**  $^1\text{H}$  NMR (400 MHz,  $\text{CDCl}_3$ ) spectrum of the reaction mixture after hydrogenation of **1** using  $\text{CCR1-d}_2$  (dioxane) and Ca to generate hydrogen (1st part, after 45 minutes): a - the signal of the initial substance, b - the signals of the product

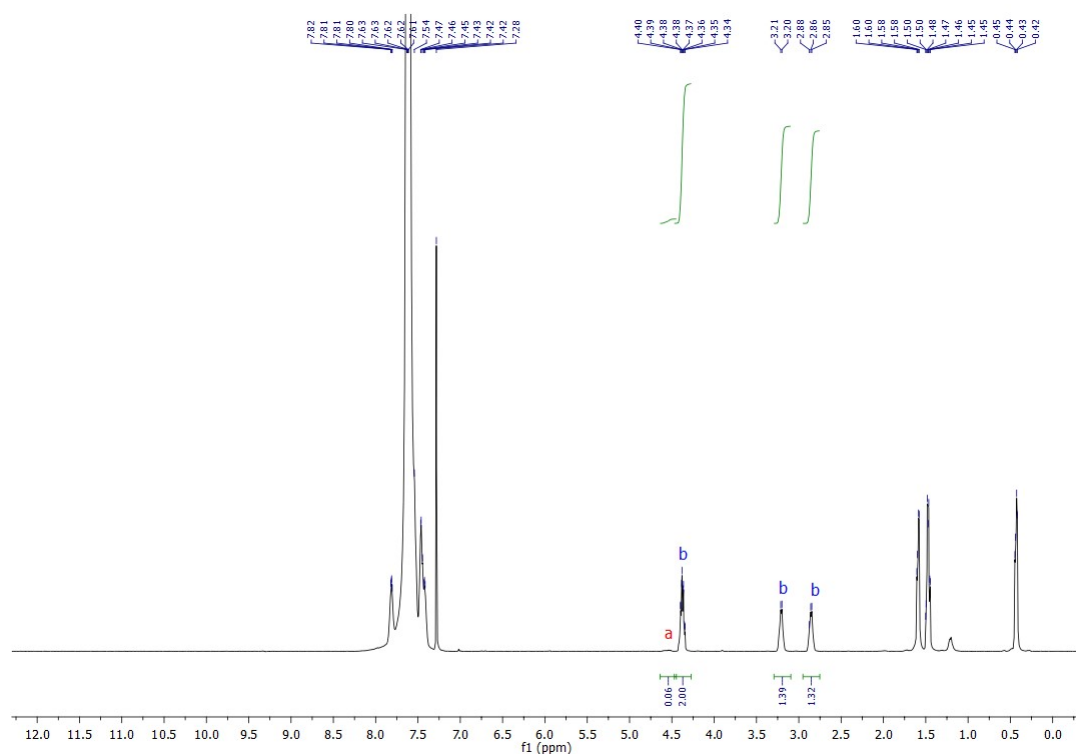

**Figure S34.**  $^1\text{H}$  NMR (400 MHz,  $\text{CDCl}_3$ ) spectrum of the reaction mixture after hydrogenation of **1** using  $\text{CCR1-d}_2$  (dioxane) and Ca to generate hydrogen (2nd part, after 45 minutes): a - the signal of the initial substance, b - the signals of the product

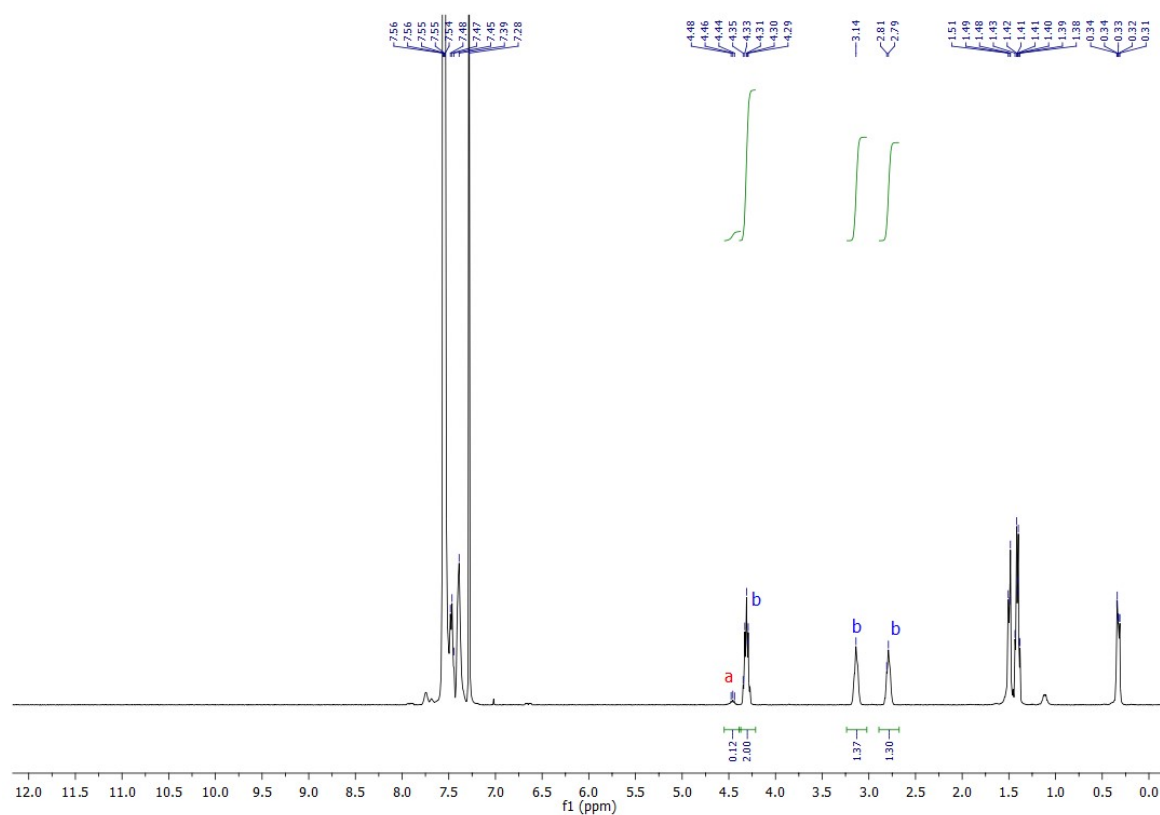

**Figure S35.**  $^1\text{H}$  NMR (400 MHz,  $\text{CDCl}_3$ ) spectrum of the reaction mixture after hydrogenation of **1** using  $\text{CCR1-d}_2$  (dioxane) and Ca to generate hydrogen (1st part, after 45 minutes using benzene- $\text{d}_6$  and dry catalyst): a - the signal of the initial substance, b - the signals of the product



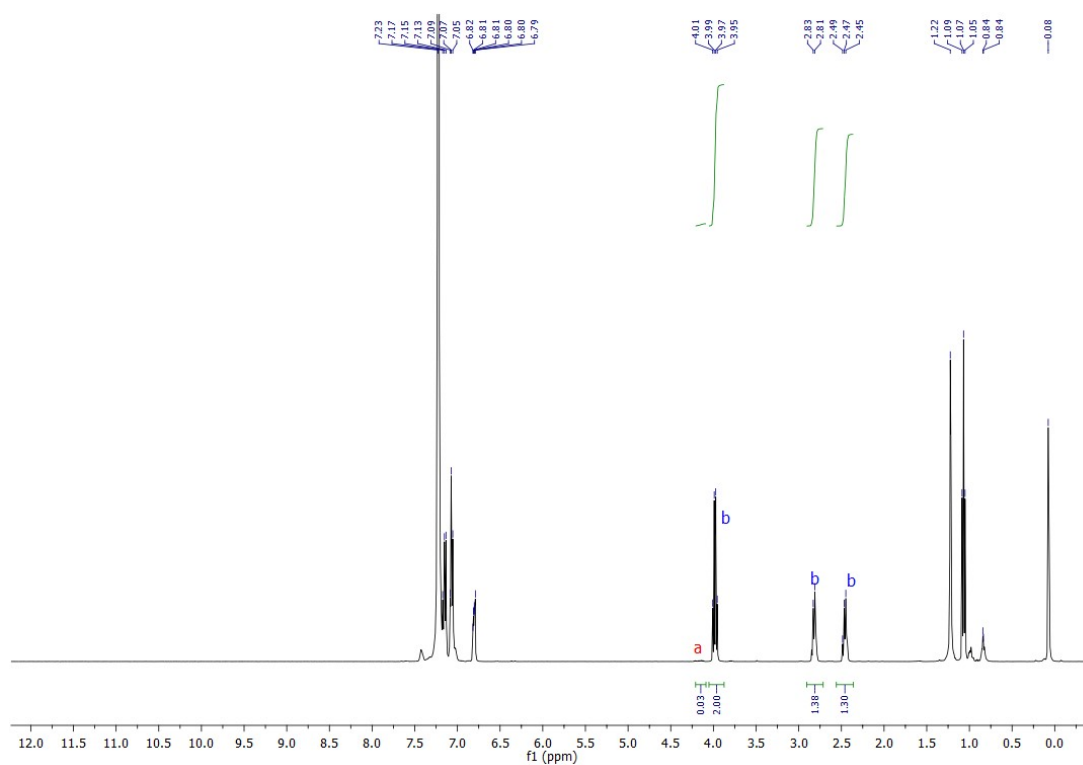

**Figure S36.**  $^1\text{H}$  NMR (400 MHz,  $\text{CDCl}_3$ ) spectrum of the reaction mixture after hydrogenation of **1** using CCR1- $d_2$  (dioxane) and Ca to generate hydrogen (2nd part, after 45 minutes using benzene- $d_6$  and dry catalyst): a - the signal of the initial substance, b - the signals of the product

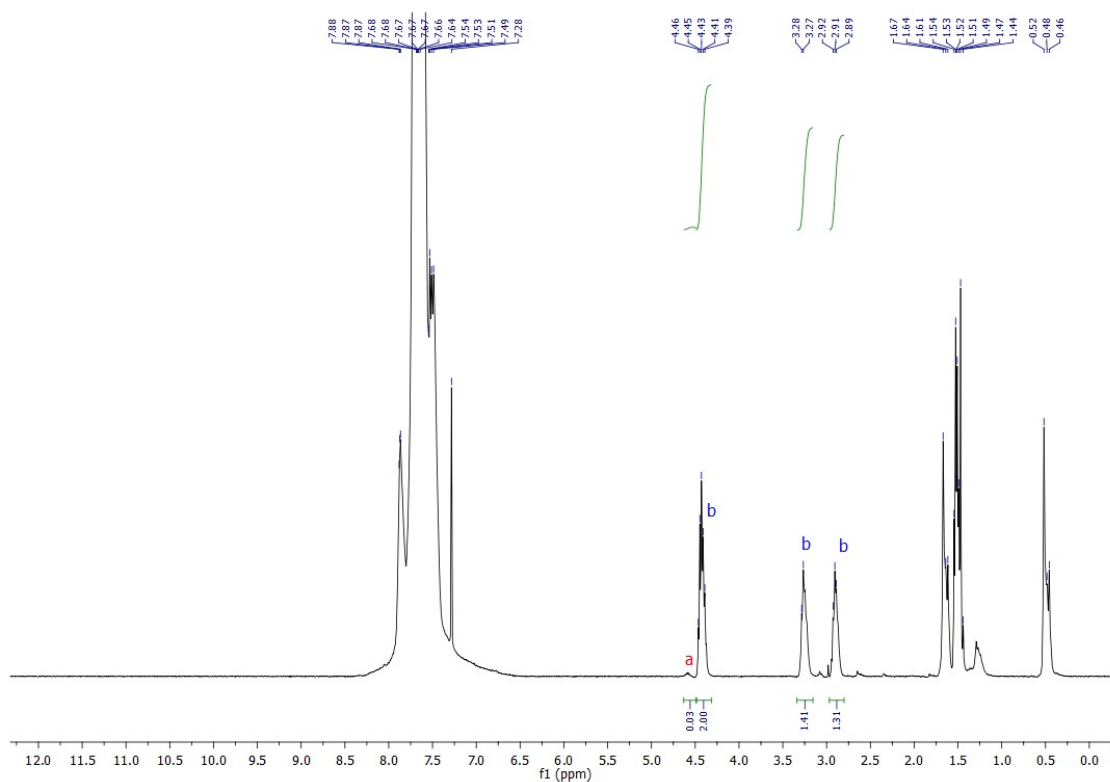

**Figure S37.**  $^1\text{H}$  NMR (400 MHz,  $\text{CDCl}_3$ ) spectrum of the reaction mixture after hydrogenation of **1** using CCR2- $d_2$  and Ca to generate hydrogen (1st part, after 45 minutes): a - the signal of the initial substance, b - the signals of the product

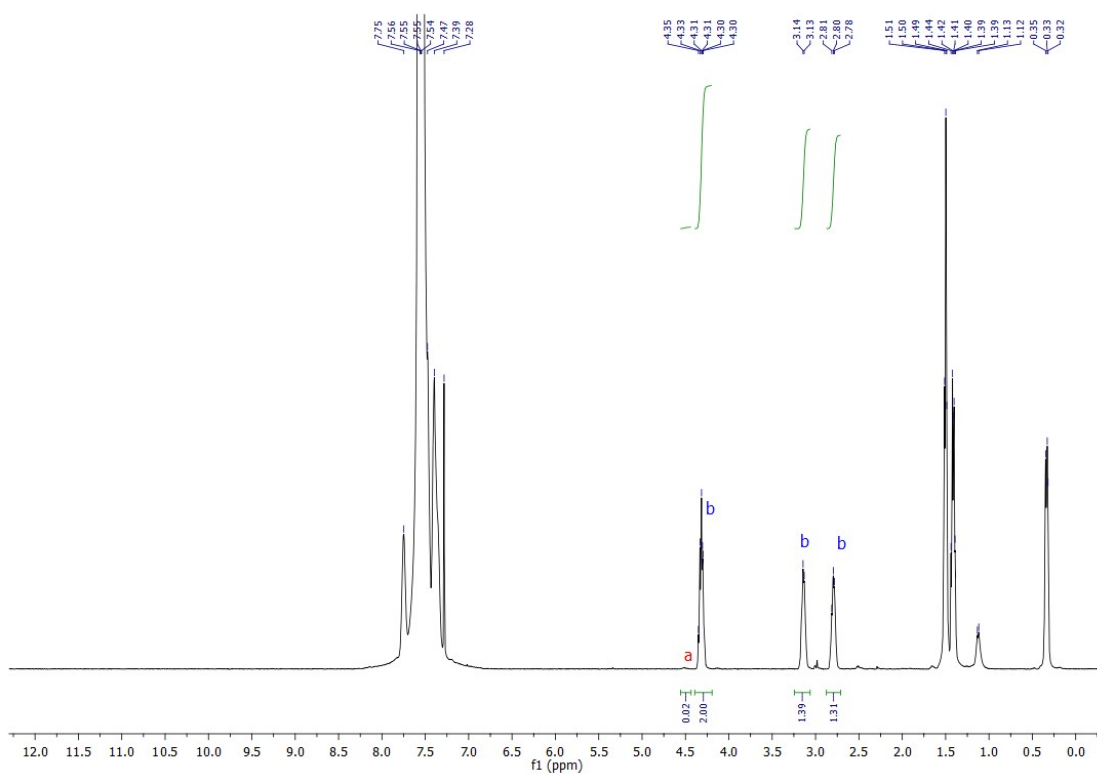

**Figure S38.**  $^1\text{H}$  NMR (400 MHz,  $\text{CDCl}_3$ ) spectrum of the reaction mixture after hydrogenation of **1** using  $\text{CCR2-d}_2$  and Ca to generate hydrogen (2nd part, after 45 minutes): a - the signal of the initial substance, b - the signals of the product

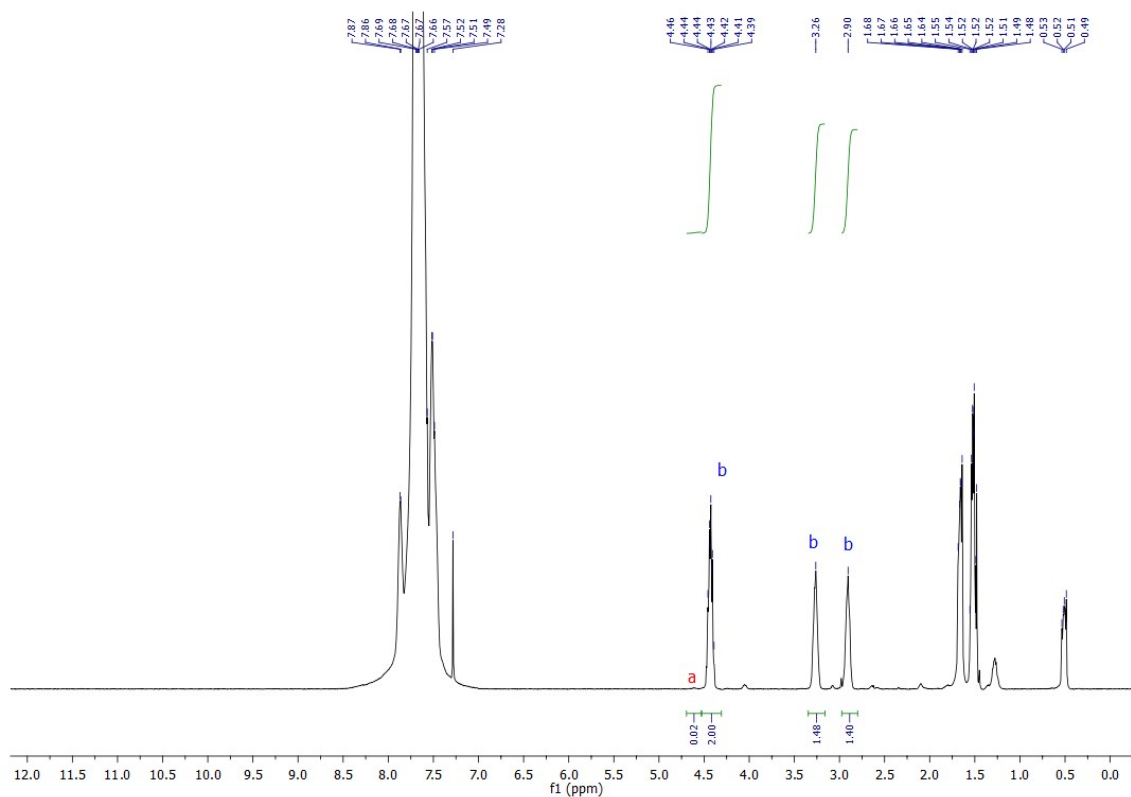

**Figure S39.**  $^1\text{H}$  NMR (400 MHz,  $\text{CDCl}_3$ ) spectrum of the reaction mixture after hydrogenation of **1** using  $\text{CCR3-d}_2$  and Ca to generate hydrogen (1st part, after 45 minutes): a - the signal of the initial substance, b - the signals of the product

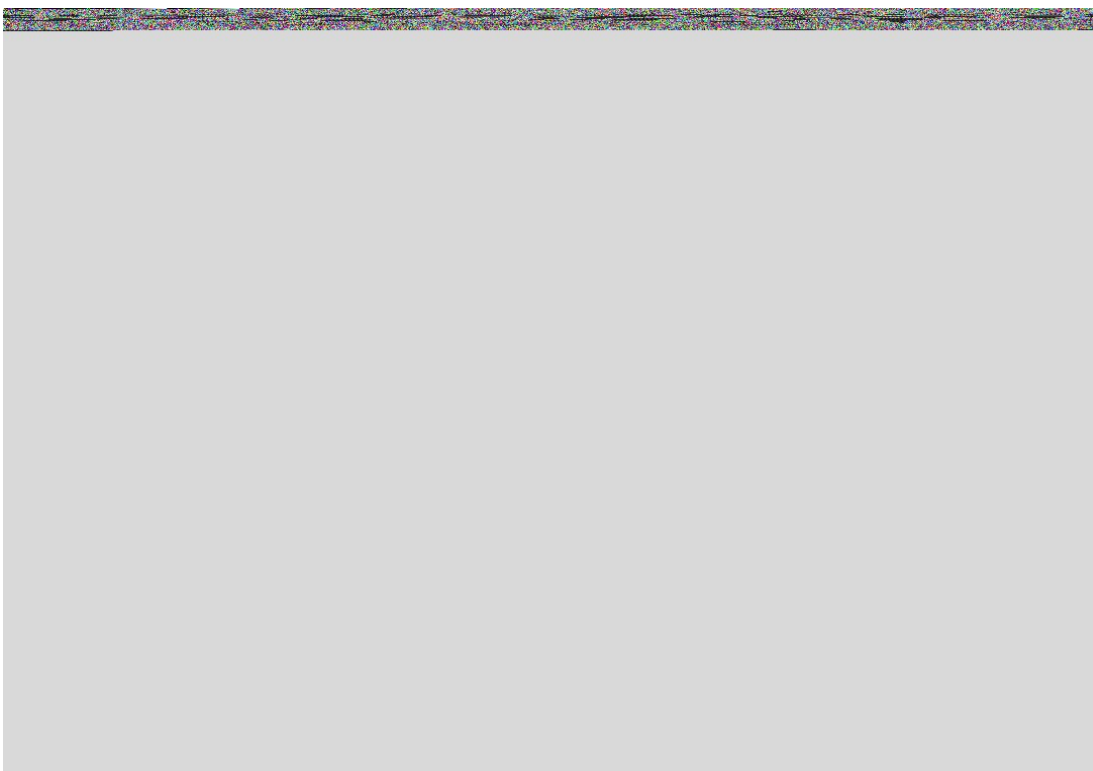

**Figure S40.**  $^1\text{H}$  NMR (400 MHz,  $\text{CDCl}_3$ ) spectrum of the reaction mixture after hydrogenation of **1** using  $\text{CCR3-d}_2$  and Ca to generate hydrogen (2nd part, after 45 minutes): a - the signal of the initial substance, b - the signals of the product

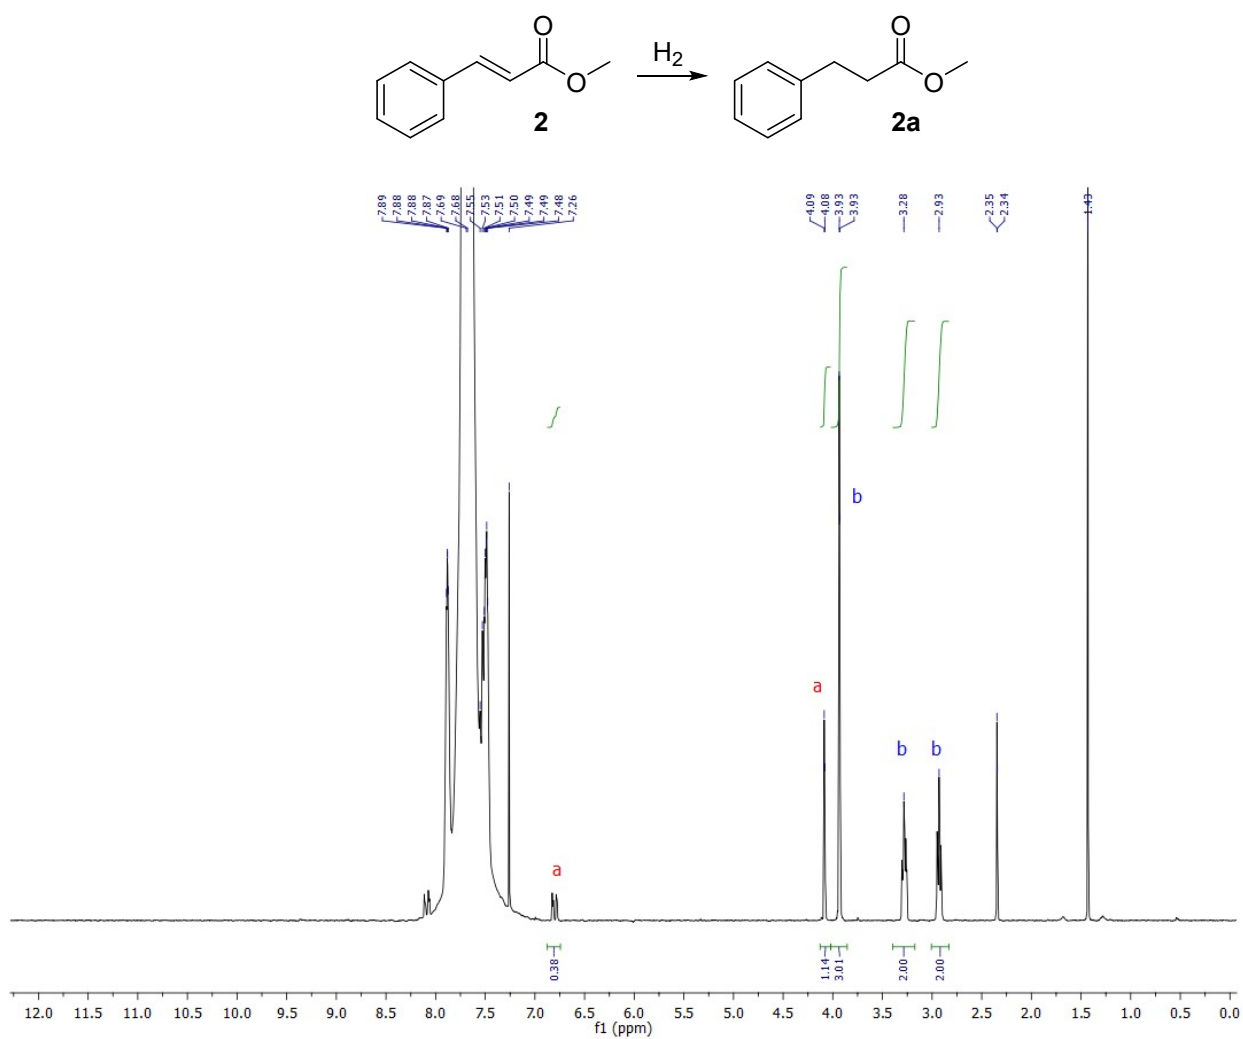

**Figure S41.**  $^1\text{H}$  NMR (400 MHz,  $\text{CDCl}_3$ ) spectrum of the reaction mixture after hydrogenation of substrate **2** using CCR2 and Ca: a - the signals of the initial substance, b - the signals of the product

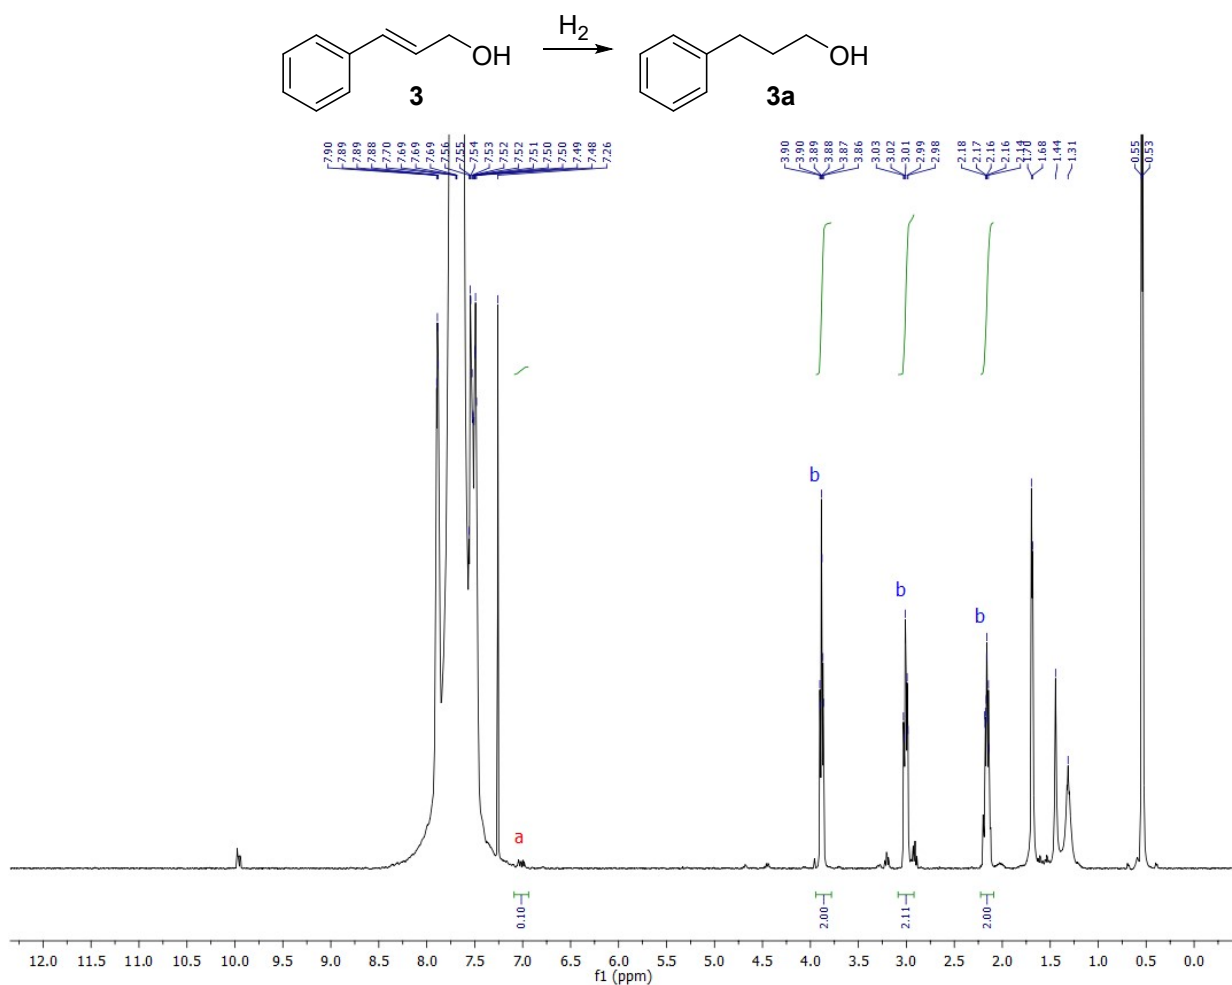

**Figure S42.** <sup>1</sup>H NMR (400 MHz, CDCl<sub>3</sub>) spectrum of the reaction mixture after hydrogenation of substrate **3** using CCR2 and Ca: a - the signals of the initial substance, b - the signals of the product

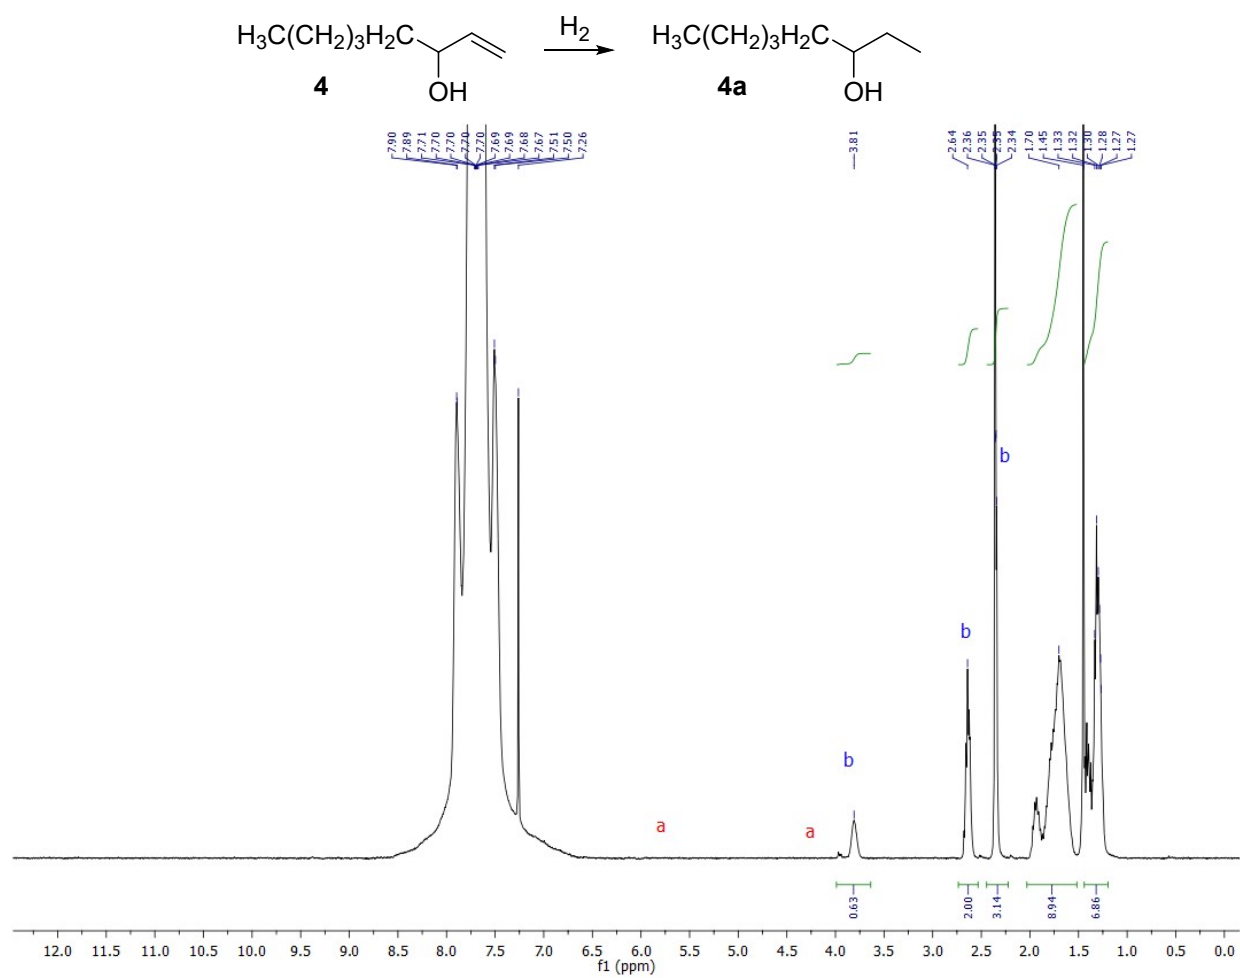

**Figure S43.**  $^1\text{H}$  NMR (400 MHz,  $\text{CDCl}_3$ ) spectrum of the reaction mixture after hydrogenation of substrate **4** using CCR2 and Ca: a - the signals of the initial substance (absent), b - the signals of the product

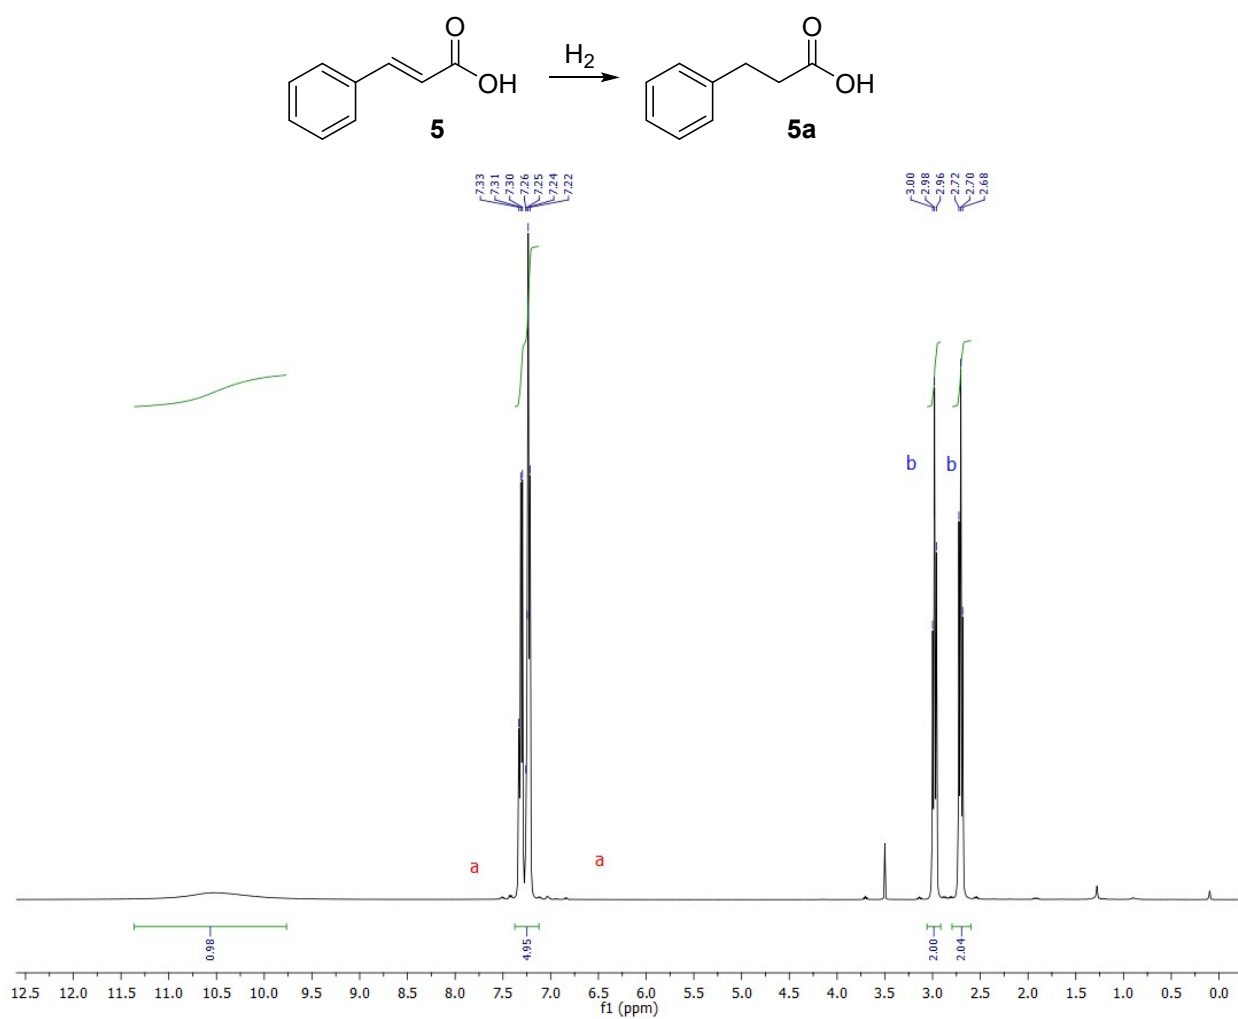

**Figure S44.**  $^1\text{H}$  NMR (400 MHz,  $\text{CDCl}_3$ ) spectrum of the reaction mixture (after filtration and solvent evaporation) after hydrogenation of substrate **5** using CCR2 and Ca: a - the signals of the initial substance (absent), b - the signals of the product

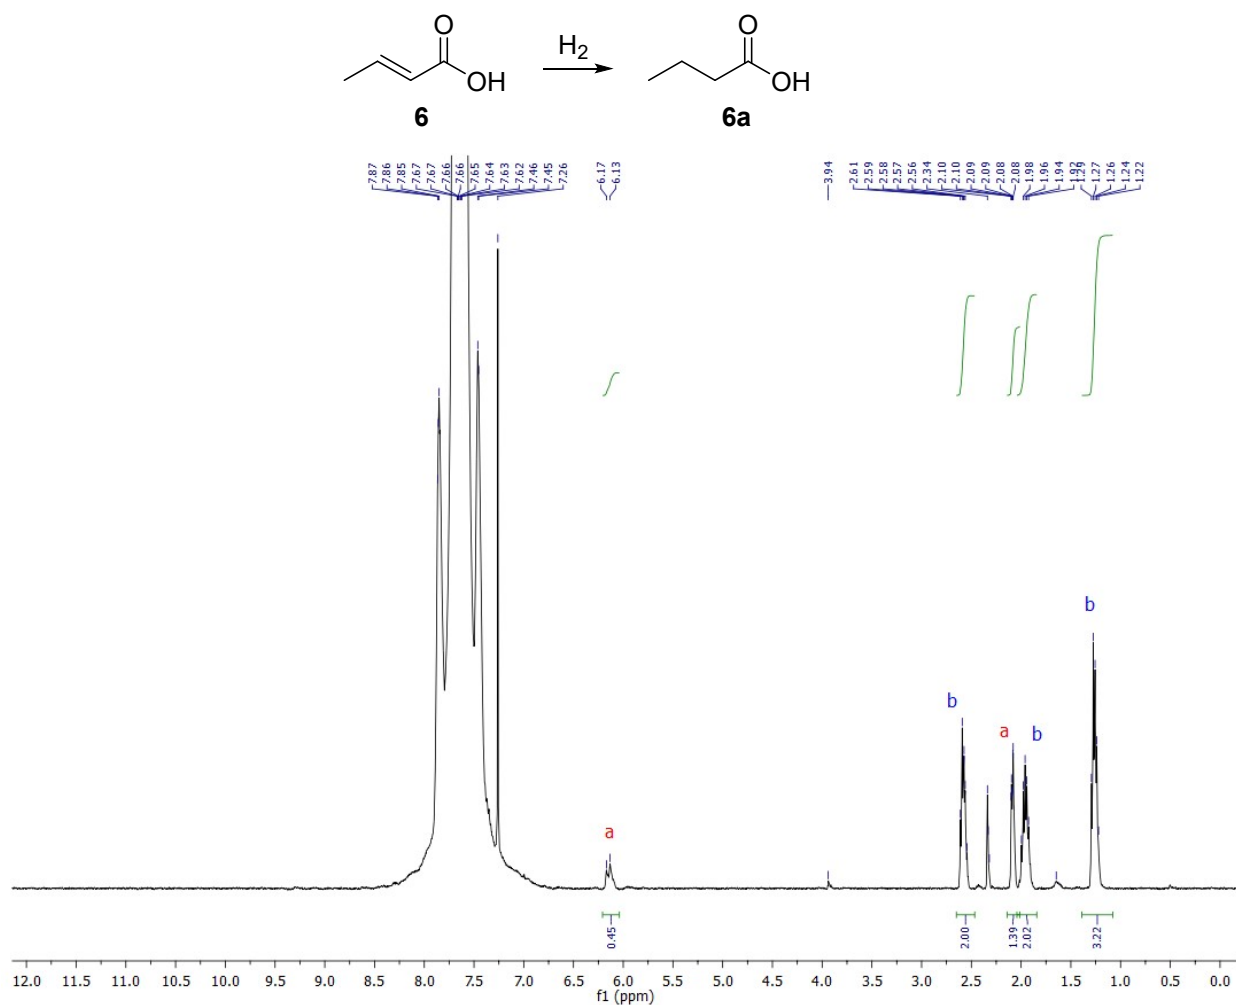

**Figure S45.**  $^1\text{H}$  NMR (400 MHz,  $\text{CDCl}_3$ ) spectrum of the reaction mixture after hydrogenation of substrate **6** using CCR2 and Ca: a - the signals of the initial substance, b - the signals of the product



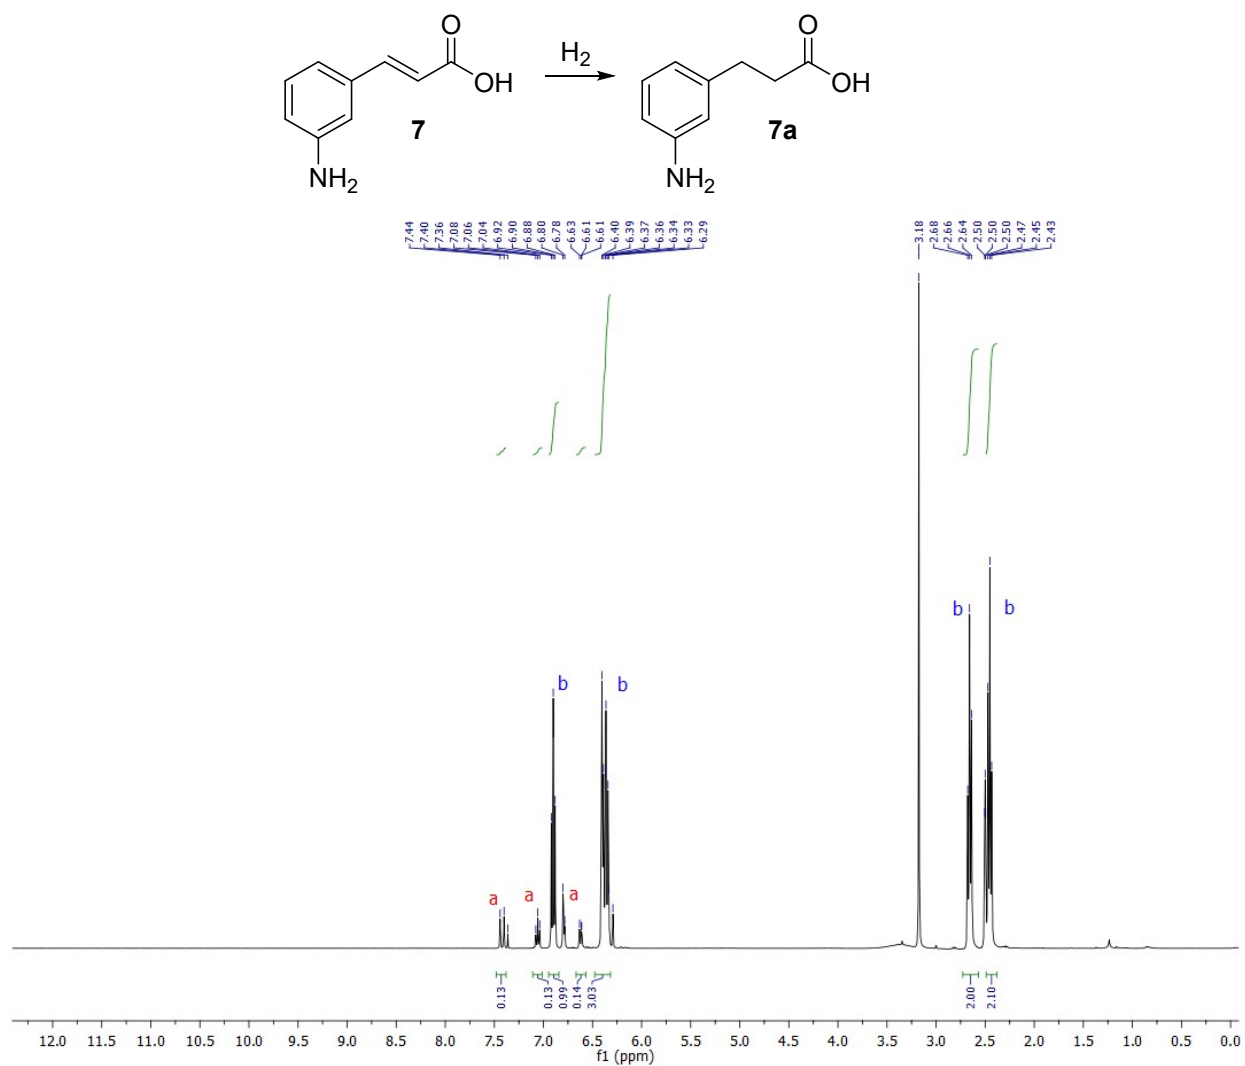

**Figure S46.** <sup>1</sup>H NMR (400 MHz, DMSO-*d*<sub>6</sub>) spectrum of the reaction mixture (after filtration and solvent evaporation) after hydrogenation of substrate **7** using CCR2 and Ca: a - the signals of the initial substance, b - the signals of the product

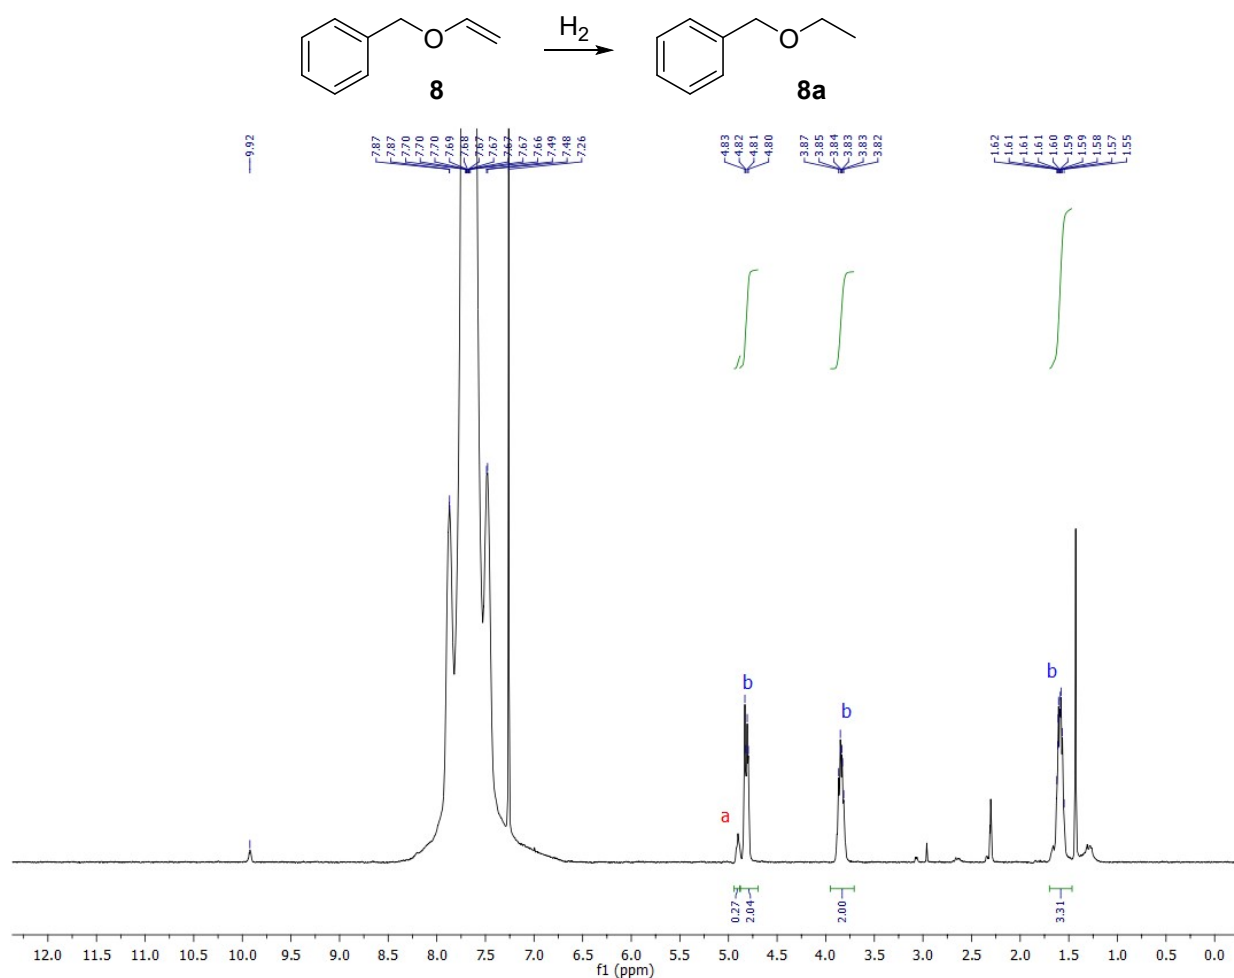

**Figure S47.**  $^1\text{H}$  NMR (400 MHz,  $\text{CDCl}_3$ ) spectrum of the reaction mixture after hydrogenation of substrate **8** using CCR2 and Ca: a - the signals of the initial substance, b - the signals of the product

## S6. SEM and EDX data

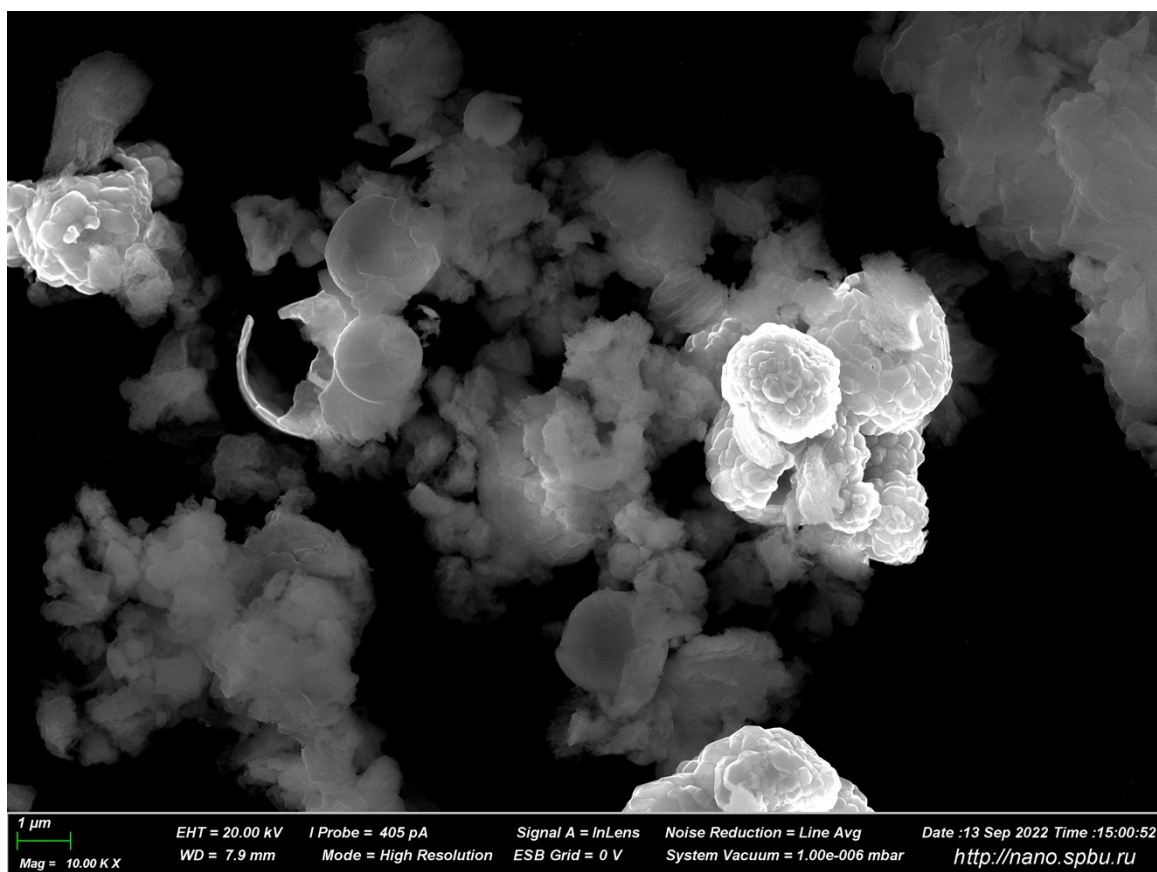

Figure S48. SEM image of the residue after the Zn + Ca(OH)<sub>2</sub> reaction. Scale bar 1 μm

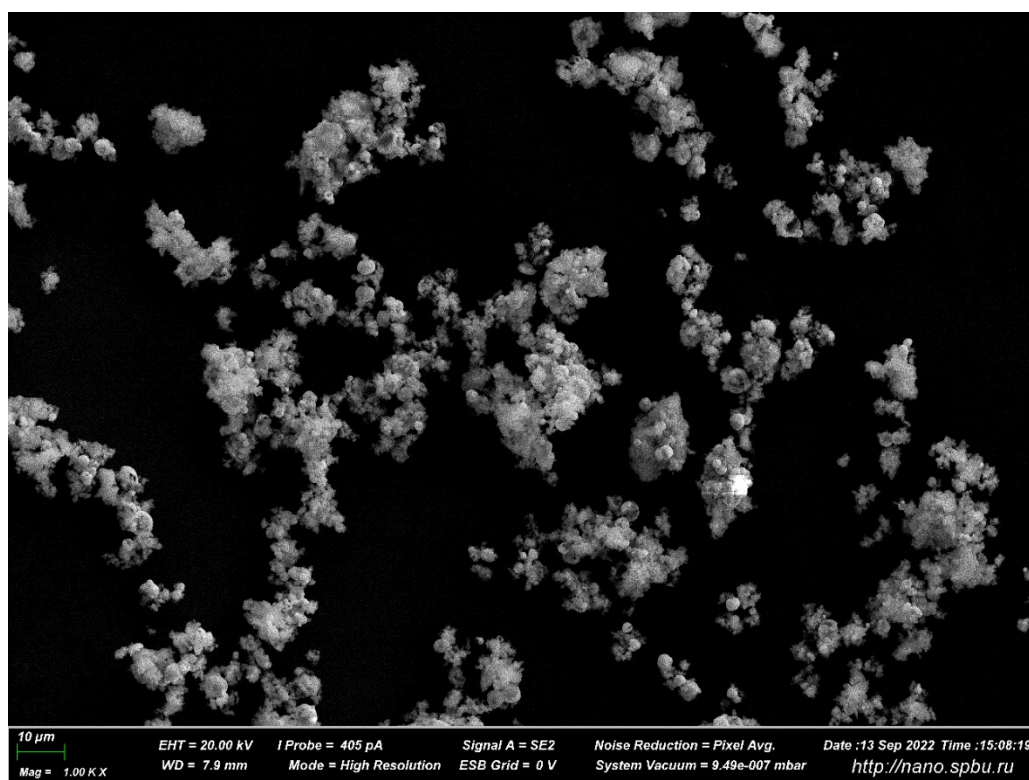

Figure S49. SEM image of the residue after the Zn + Ca(OH)<sub>2</sub> reaction. Scale bar 10 μm

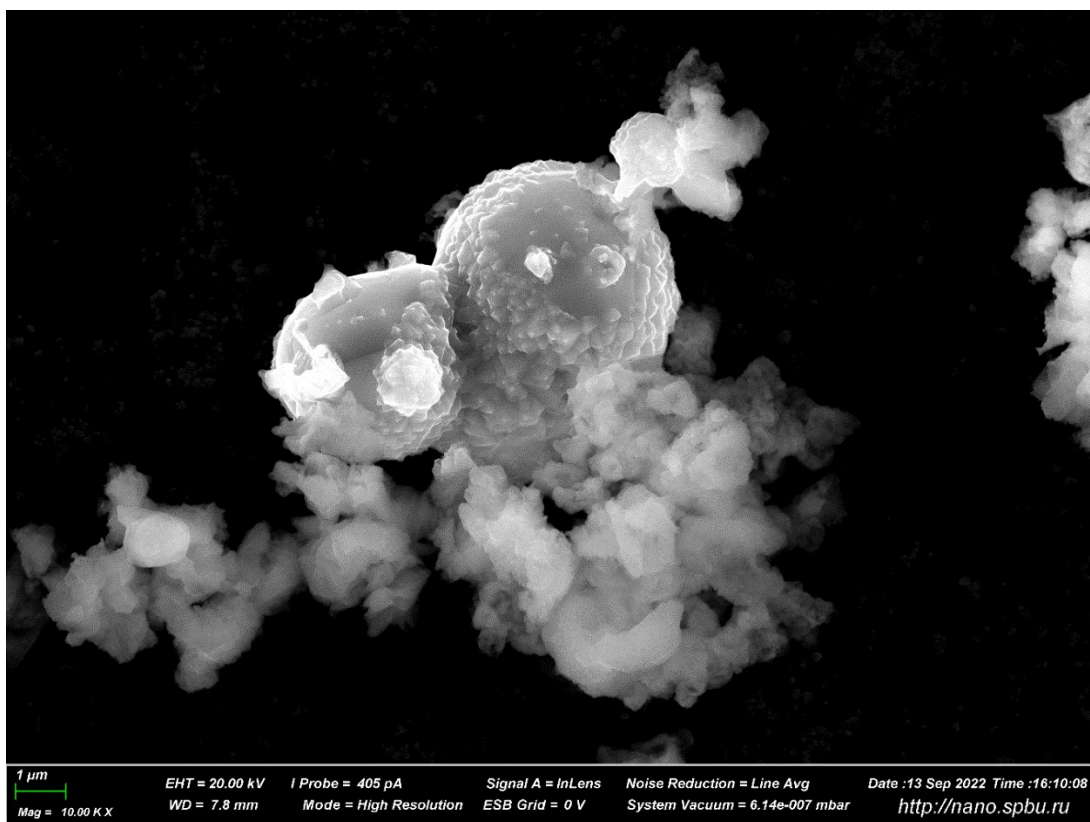

Figure S50. SEM image of the residue after the Fe + Ca(OH)<sub>2</sub> reaction. Scale bar 1 μm

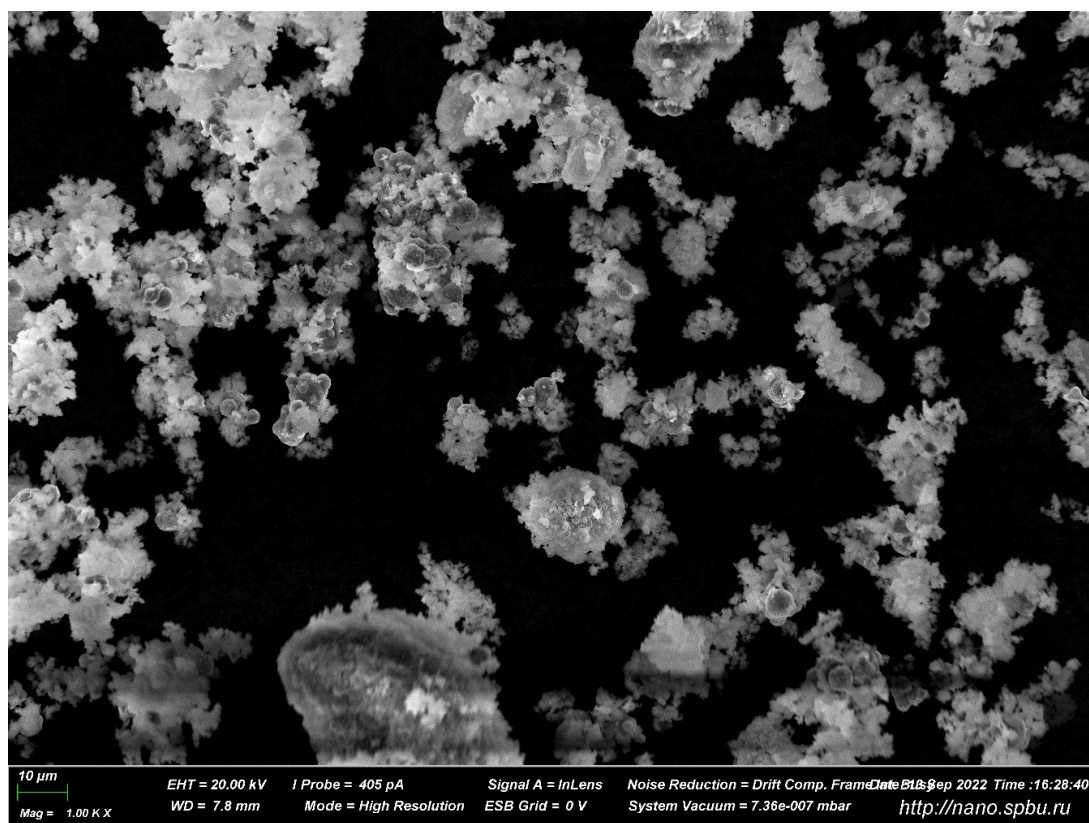

Figure S51. SEM image of the residue after the Fe + Ca(OH)<sub>2</sub> reaction. Scale bar 10 μm



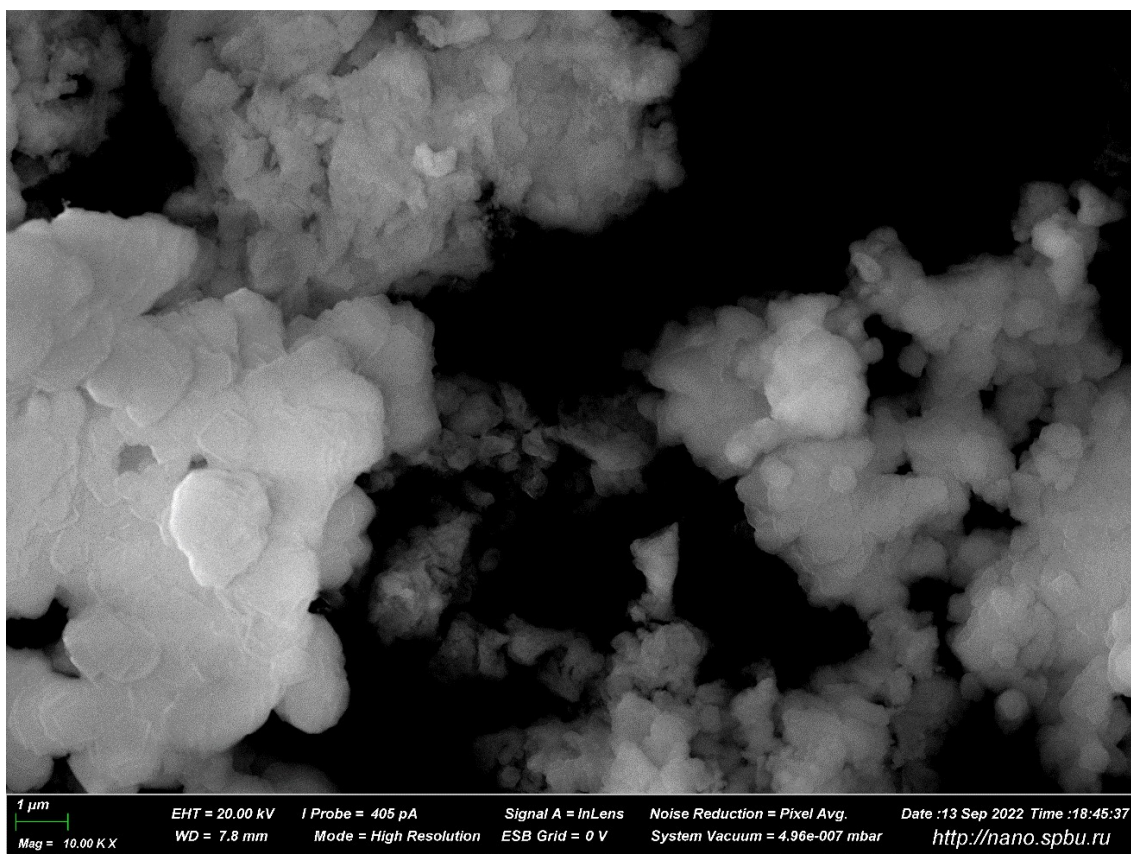

**Figure S52.** SEM image of the residue after the Mg + Ca(OH)<sub>2</sub> reaction. Scale bar 1 μm

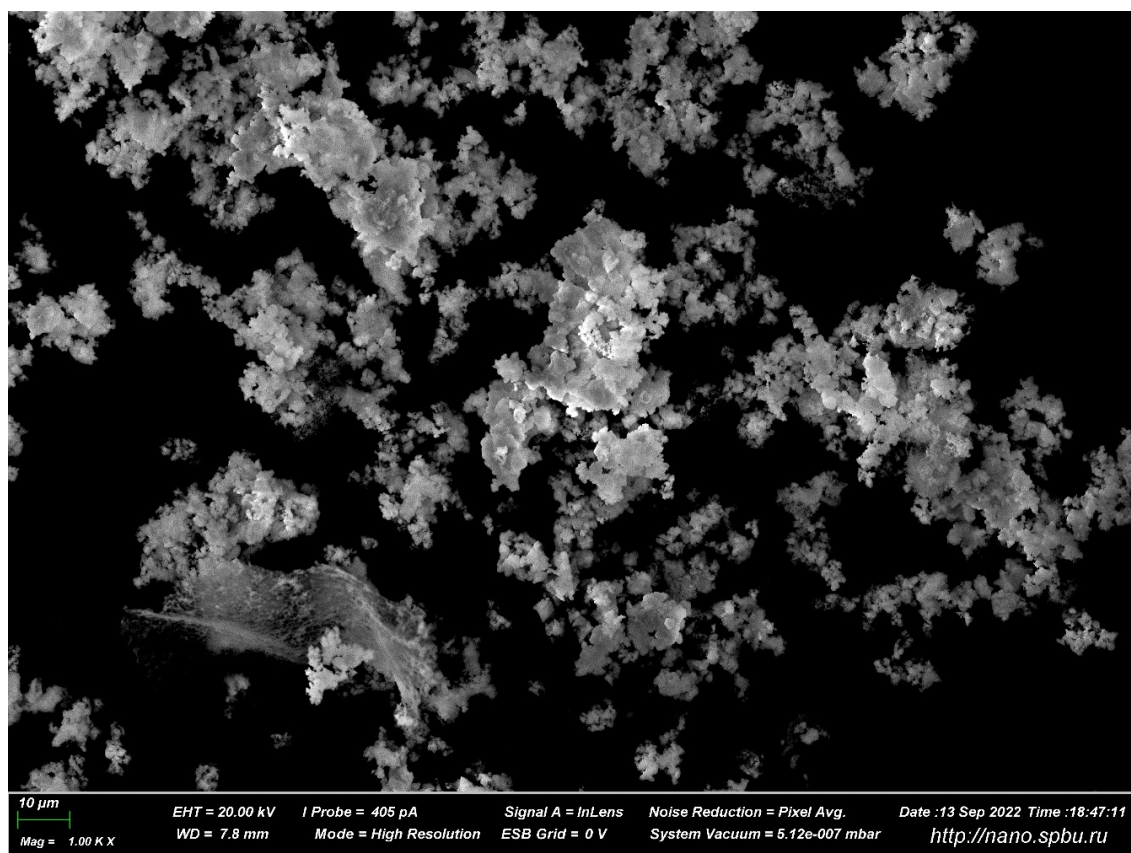

**Figure S53.** SEM image of the residue after the Mg + Ca(OH)<sub>2</sub> reaction. Scale bar 10 μm



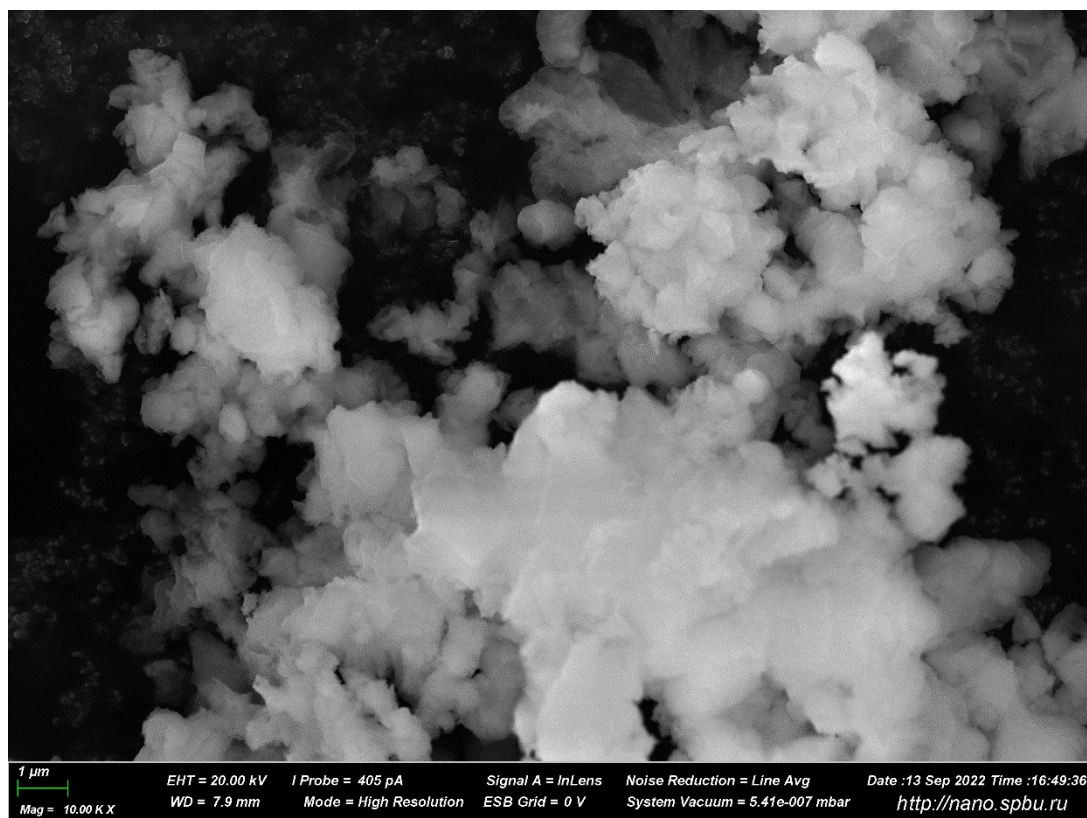

**Figure S54.** SEM image of the residue after the  $\text{Ca} + \text{Ca}(\text{OH})_2$  reaction. Scale bar 1  $\mu\text{m}$

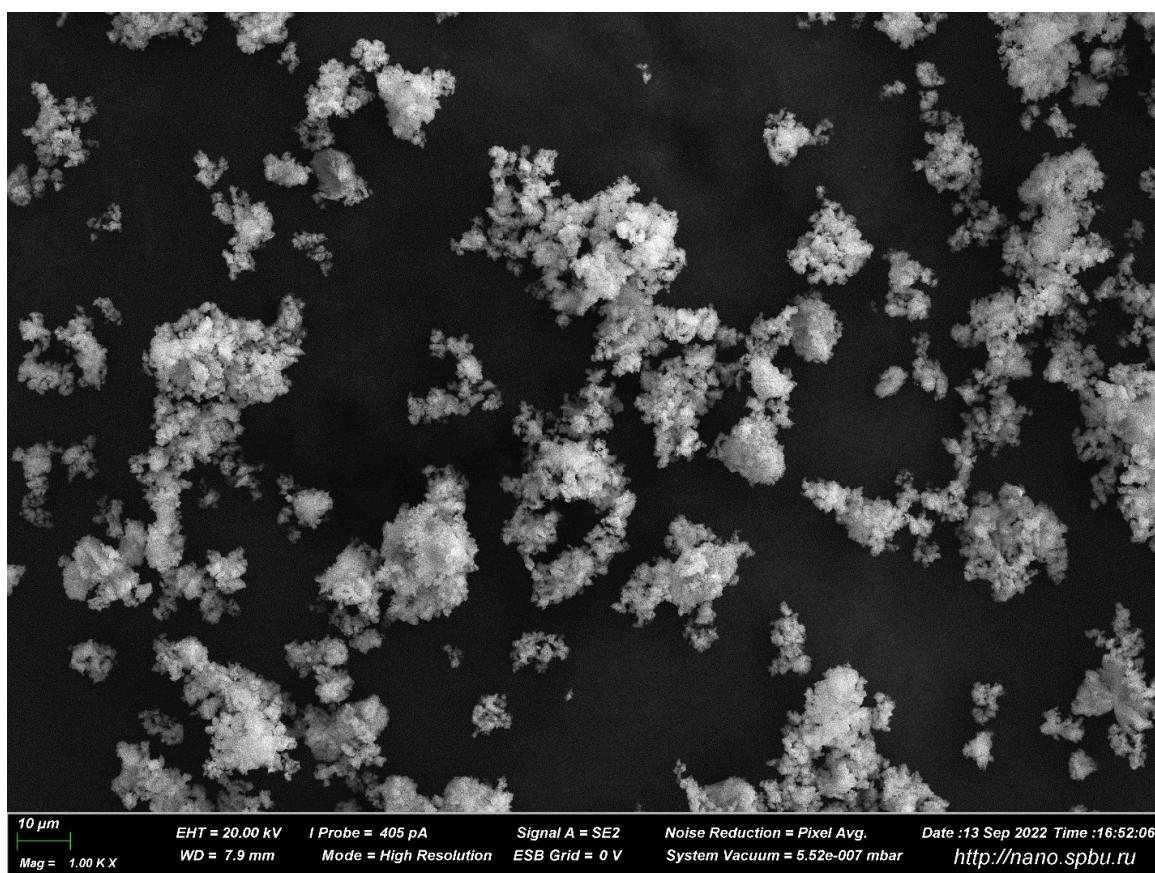

**Figure S55.** SEM image of the residue after the  $\text{Ca} + \text{Ca}(\text{OH})_2$  reaction. Scale bar 10  $\mu\text{m}$

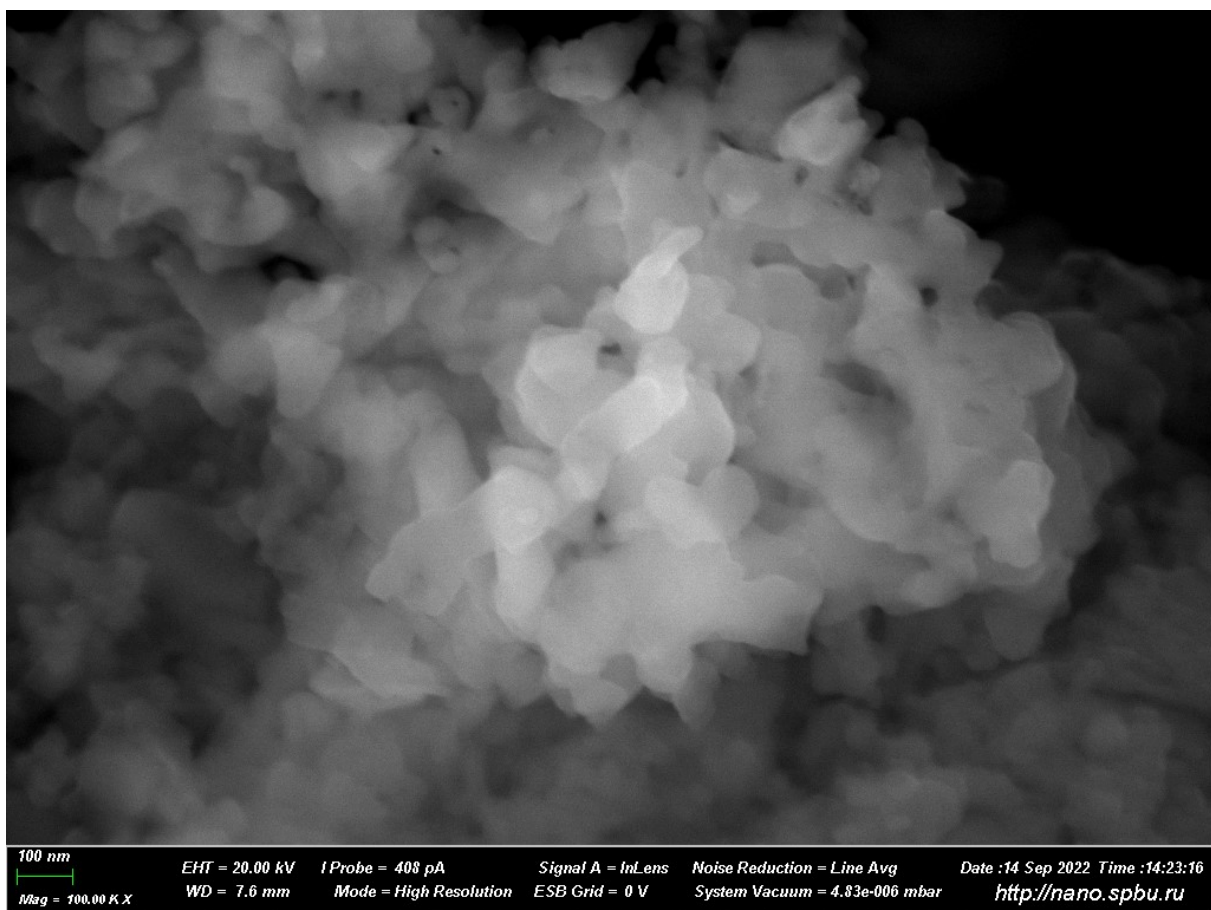

Figure S56. SEM image of the residue after the Ca + CCR1 reaction. Scale bar 100 nm

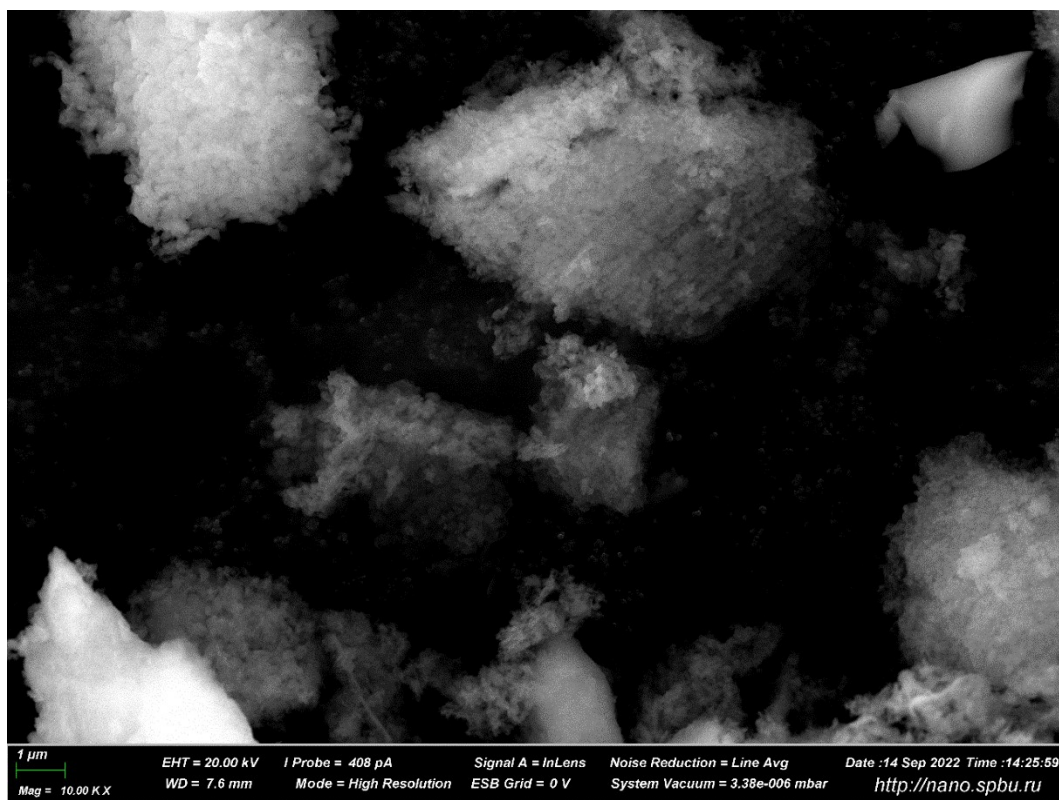

Figure S57. SEM image of the residue after the Ca + CCR1 reaction. Scale bar 1 μm



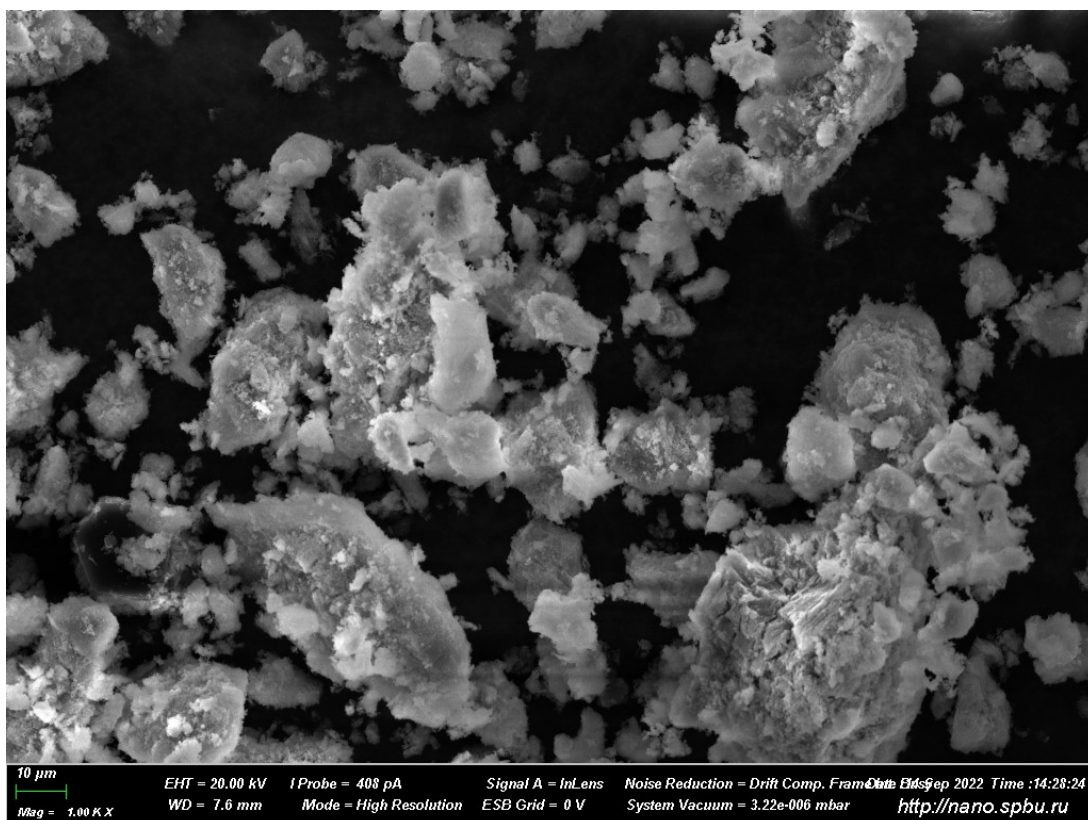

**Figure S58.** SEM image of the residue after the Ca + CCR1 reaction. Scale bar 10 μm

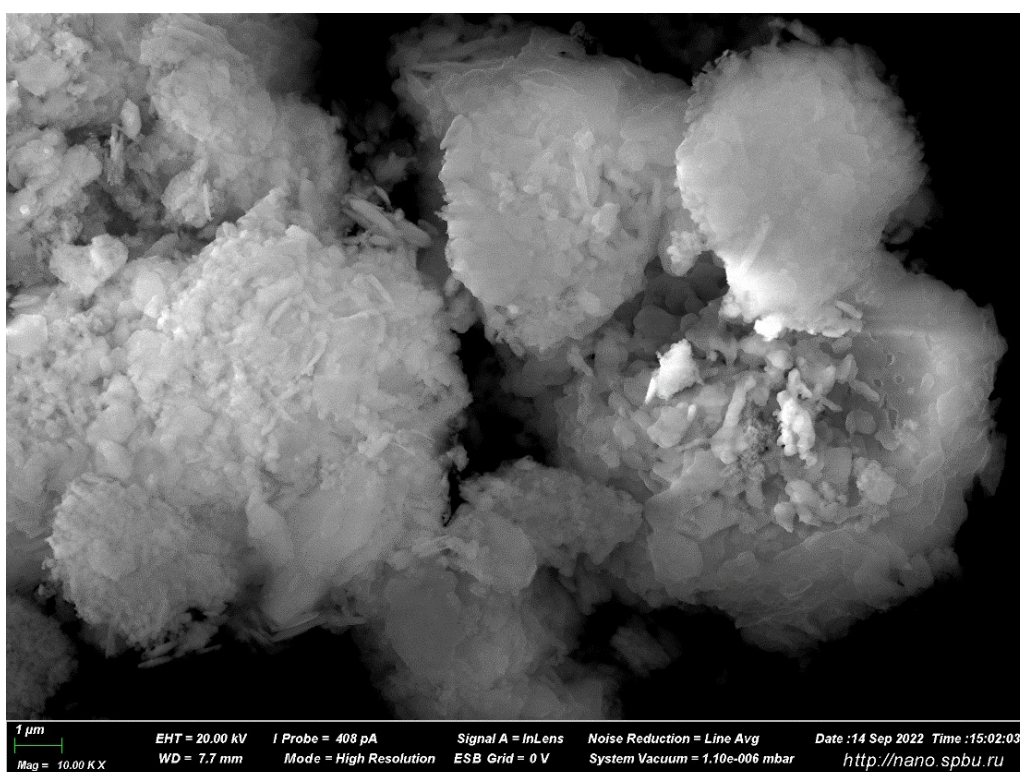

**Figure S59.** SEM image of the residue after the Ca + CCR2 reaction. Scale bar 1 μm



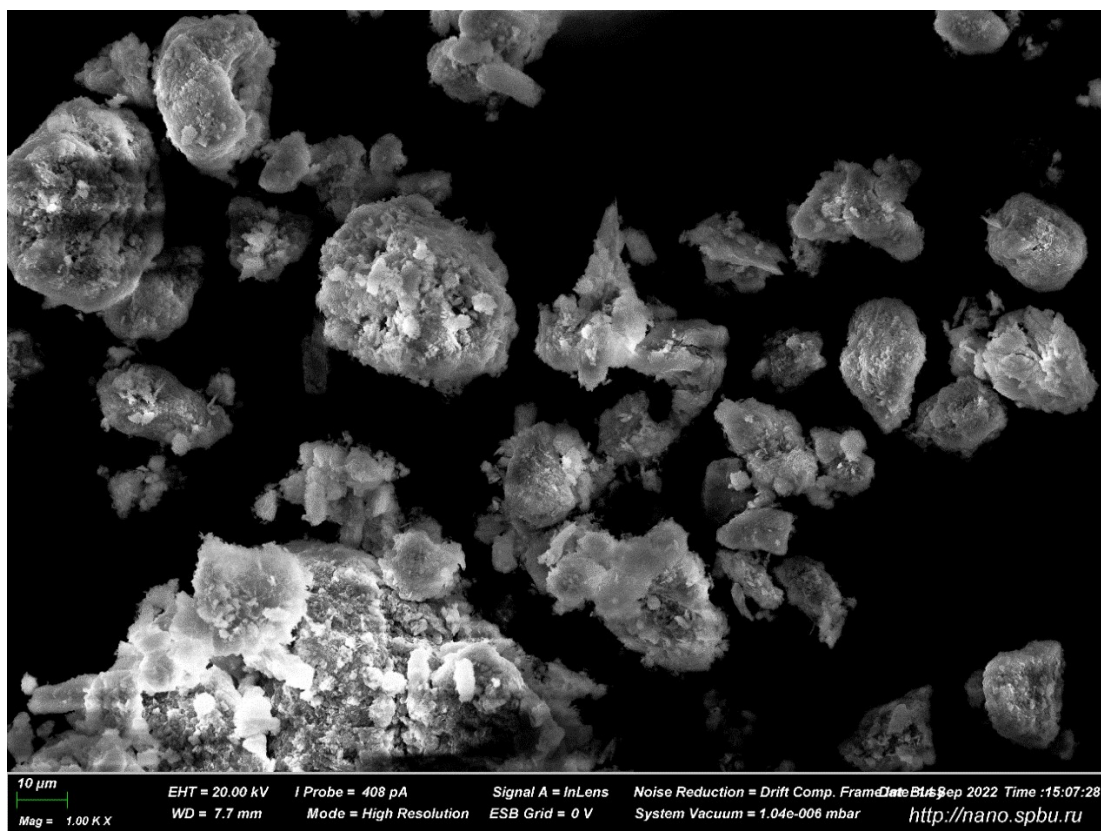

Figure S60. SEM image of the residue after the Ca + CCR<sub>2</sub> reaction. Scale bar 10 μm

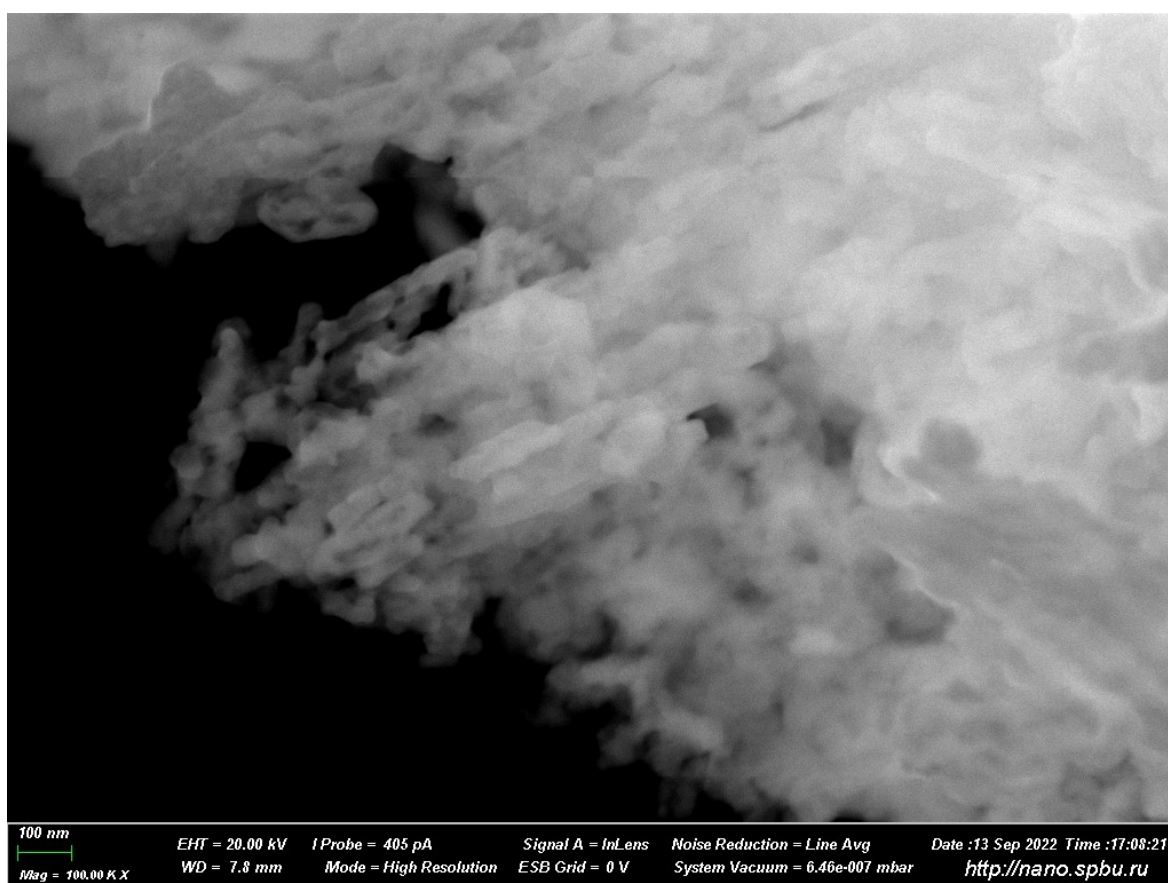

Figure S61. SEM image of the residue after the Ca + Ca(OD)<sub>2</sub> reaction. Scale bar 100 nm

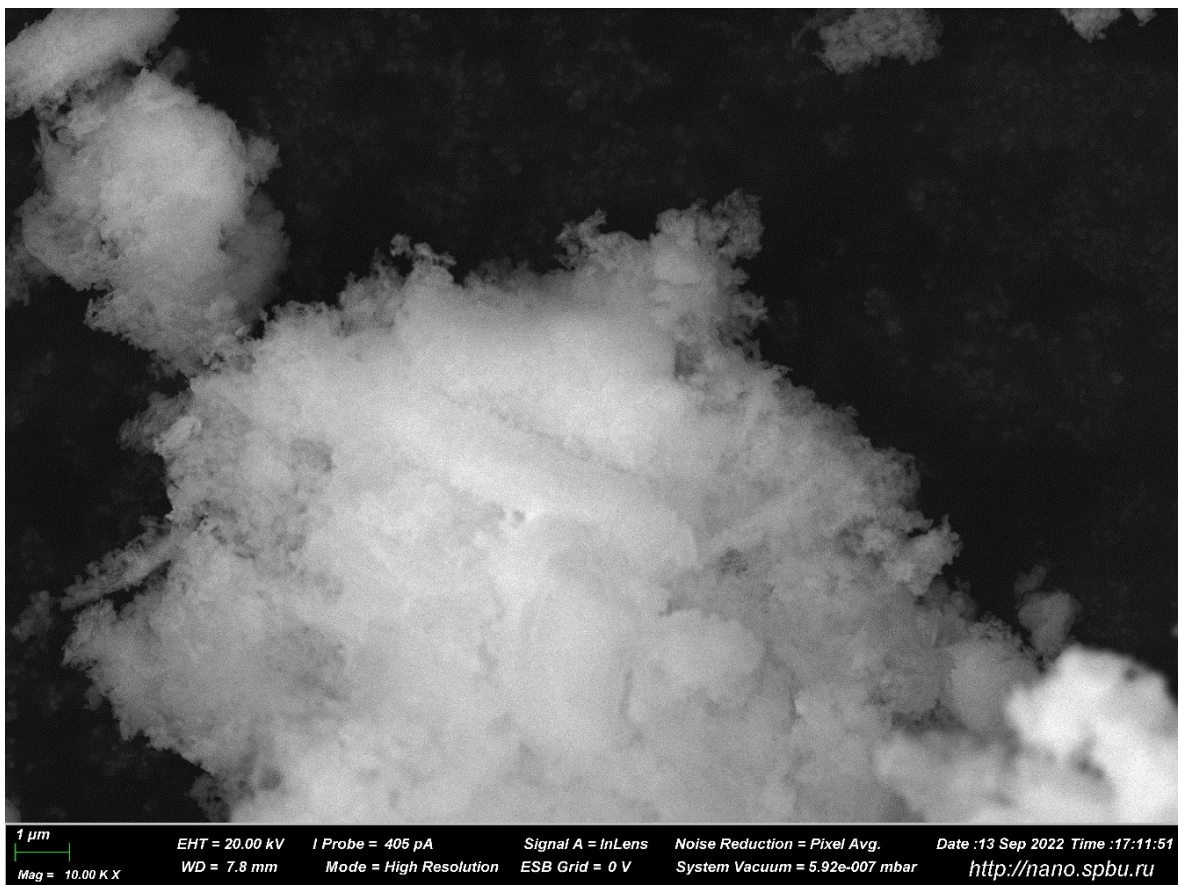

Figure S62. SEM image of the residue after the Ca + Ca(OD)<sub>2</sub> reaction. Scale bar 1  $\mu\text{m}$

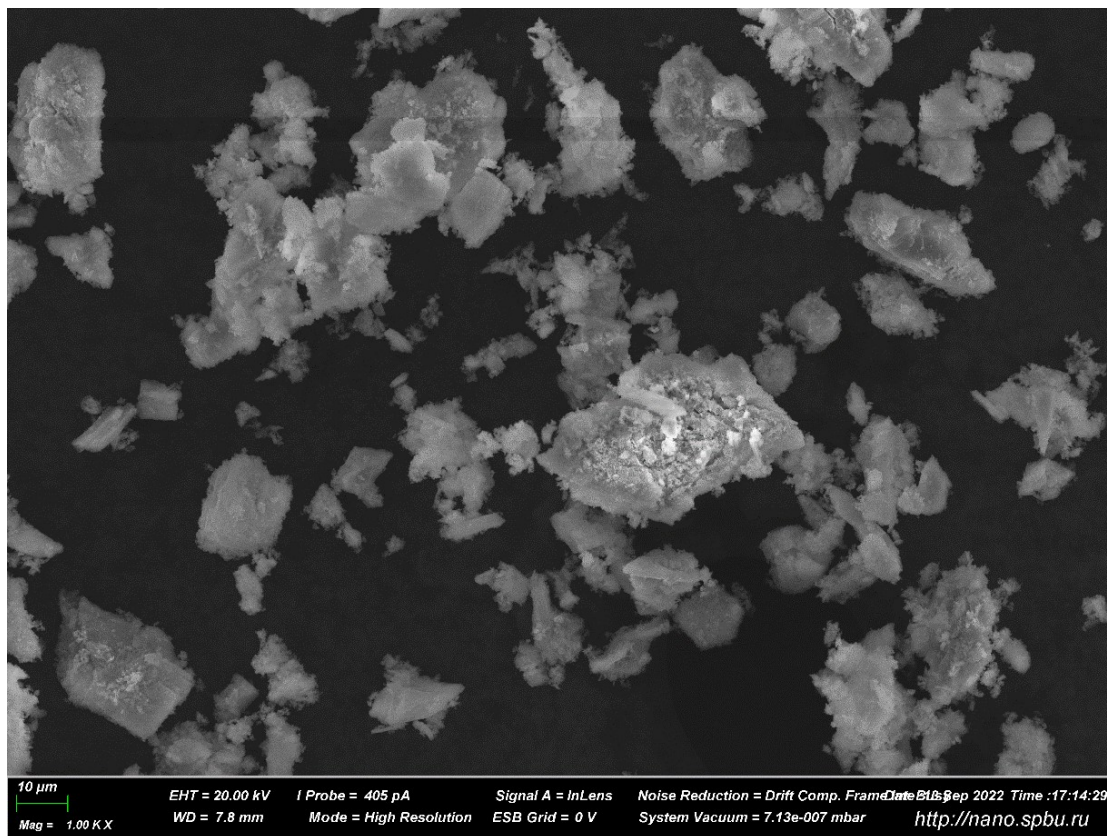

Figure S63. SEM image of the residue after the Ca + Ca(OD)<sub>2</sub> reaction. Scale bar 10  $\mu\text{m}$



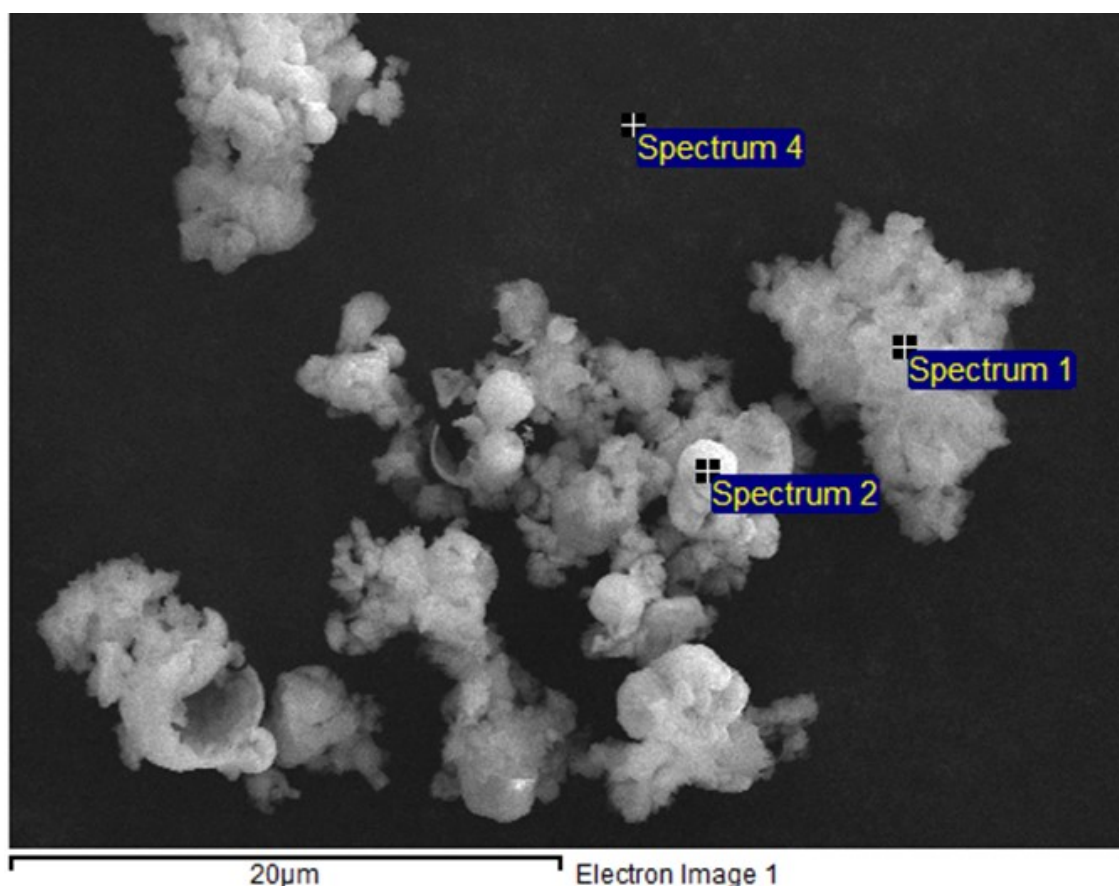

Processing option : All elements analysed (Normalised)

| Spectrum     | In stats. | C     | O     | Ca    | Zn    |
|--------------|-----------|-------|-------|-------|-------|
| Spectrum 1   | Yes       | 47.40 | 40.66 | 11.67 | 0.28  |
| Spectrum 2   | Yes       | 47.39 | 36.83 | 1.06  | 14.72 |
| Sum Spectrum | Yes       | 84.15 | 13.06 | 1.60  | 1.20  |
| Spectrum 4   | Yes       | 91.68 | 8.26  | 0.06  |       |
| Max.         |           | 91.68 | 40.66 | 11.67 | 14.72 |
| Min.         |           | 47.39 | 8.26  | 0.06  | 0.28  |

All results in atomic%

**Figure S64.** SEM image of the residue after the Zn + Ca(OH)<sub>2</sub> reaction (scale bar 20 μm) with the determination of the elemental composition in selected areas. The surface on which was carried out contained C and O, so their value in the table was not taken into account

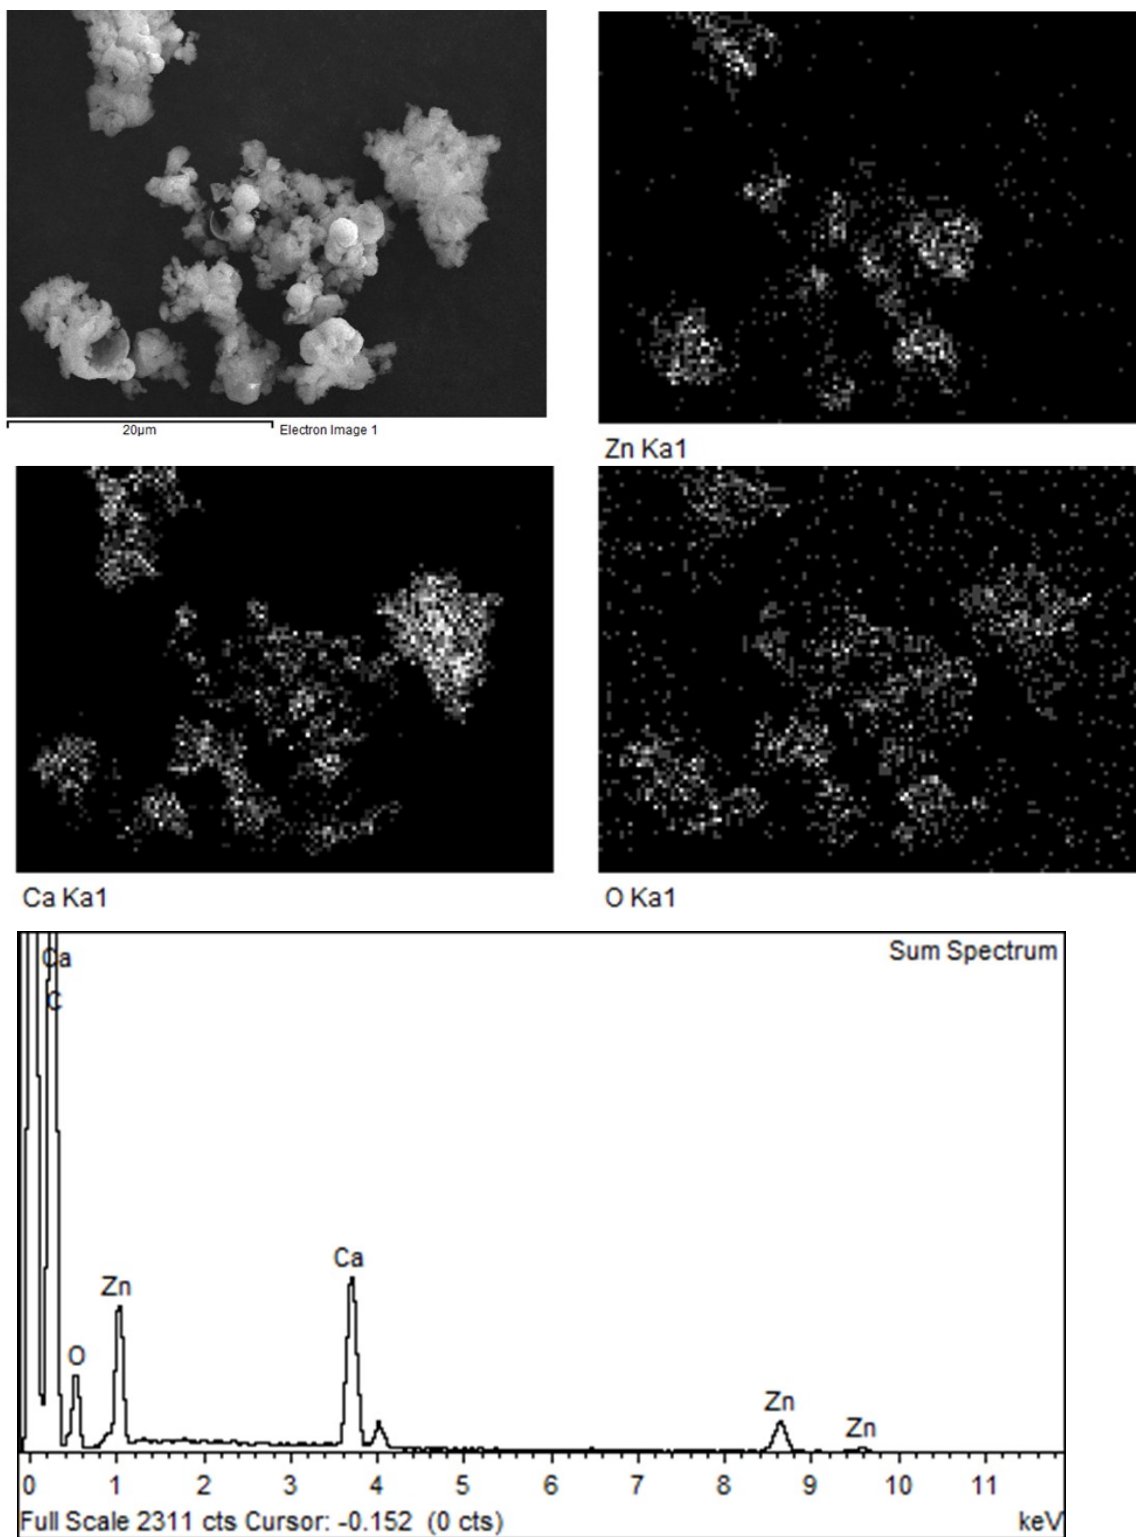

**Figure S65.** EDX mapping (with spectrum below) of the residue after the Zn + Ca(OH)<sub>2</sub> reaction. Scale bar 20 μm

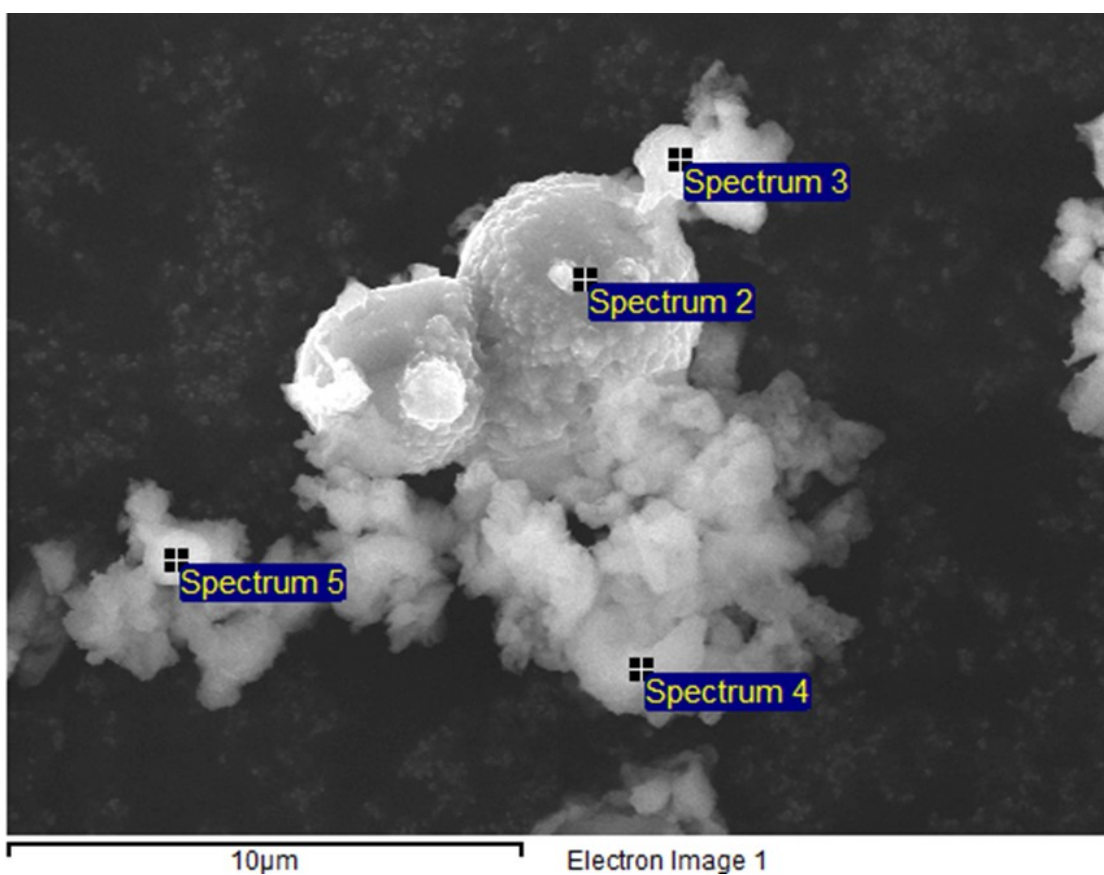

Processing option : All elements analysed (Normalised)

| Spectrum     | In stats. | O     | Ca    | Fe    | Zn   |
|--------------|-----------|-------|-------|-------|------|
| Sum Spectrum | Yes       | 69.98 | 12.10 | 17.45 | 0.46 |
| Spectrum 2   | Yes       | 17.21 | 3.02  | 79.77 |      |
| Spectrum 3   | Yes       | 39.88 | 8.02  | 52.10 |      |
| Spectrum 4   | Yes       | 73.40 | 24.96 | 1.64  |      |
| Spectrum 5   | Yes       | 82.18 | 16.16 | 1.67  |      |
| Max.         |           | 82.18 | 24.96 | 79.77 | 0.46 |
| Min.         |           | 17.21 | 3.02  | 1.64  | 0.46 |

All results in atomic %

**Figure S66.** SEM image of the residue after the Fe + Ca(OH)<sub>2</sub> reaction (scale bar 10 μm) with the determination of the elemental composition in selected areas. The surface on which was carried out contained C and O, so their value in the table was not taken into account

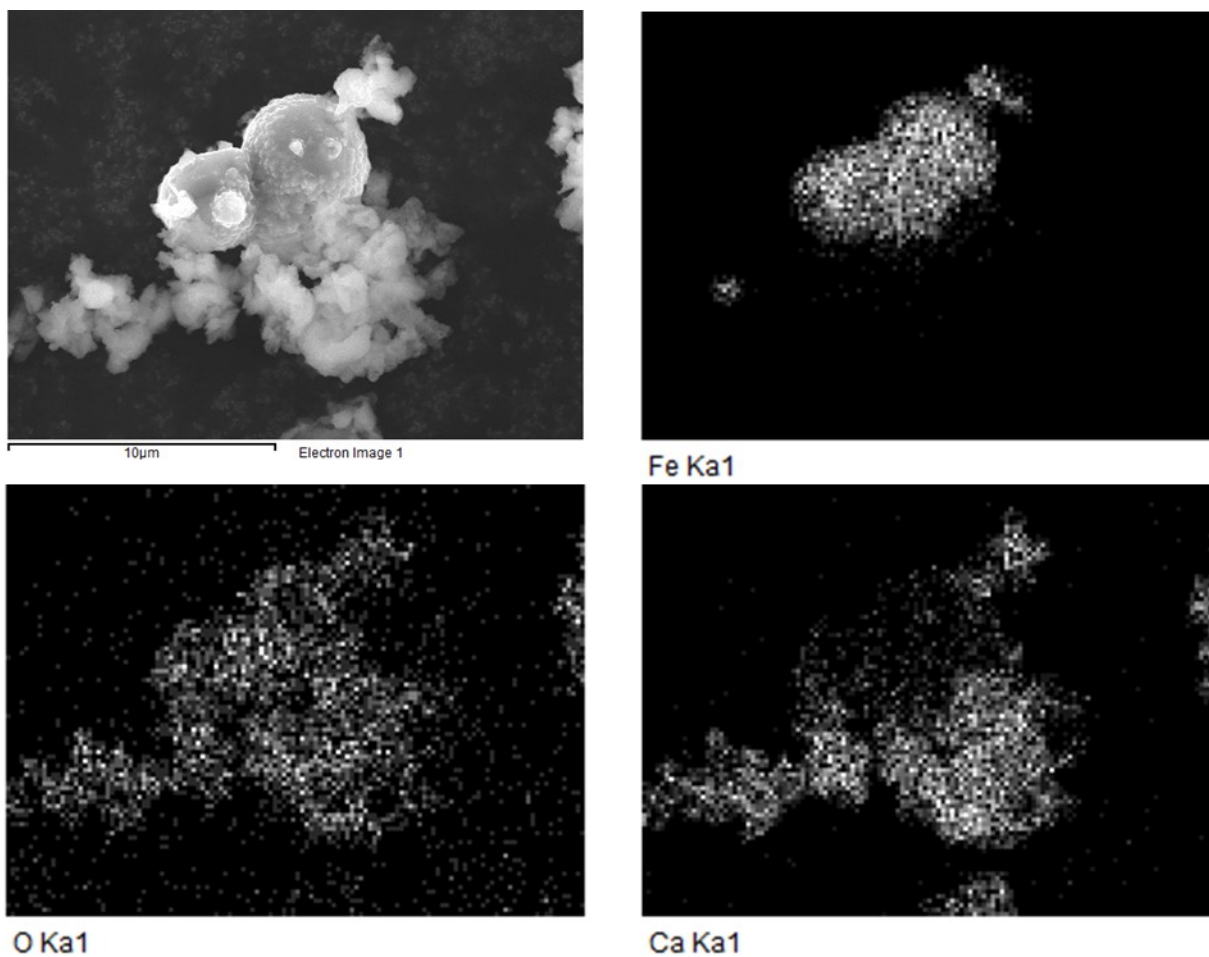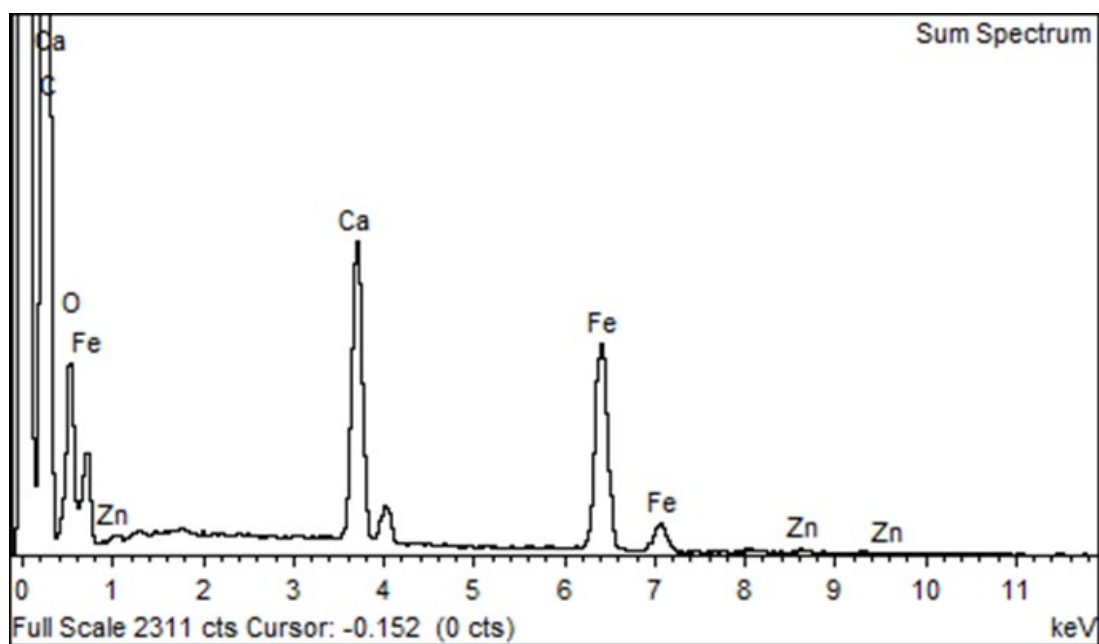

**Figure S67.** EDX mapping (with spectrum below) of the residue after the Fe +  $\text{Ca}(\text{OH})_2$  reaction. Scale bar 10  $\mu\text{m}$

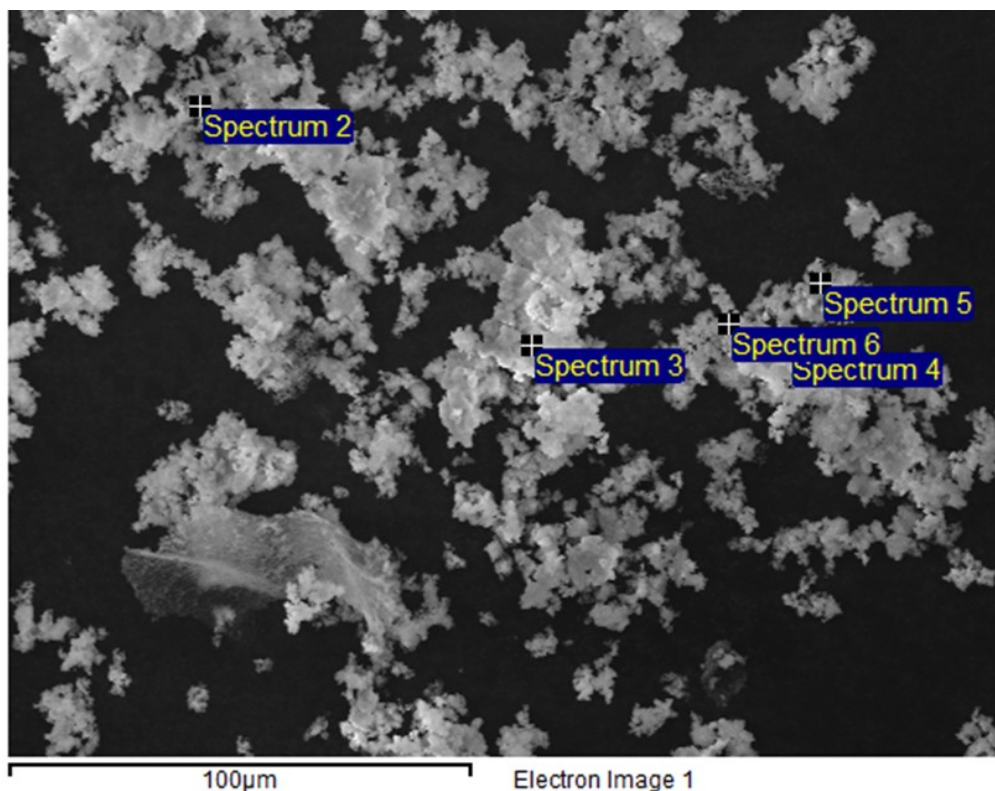

Processing option : All elements analysed (Normalised)

| Spectrum       | In stats. | O     | Mg    | Ca    |
|----------------|-----------|-------|-------|-------|
| Sum Spectrum   | Yes       | 72.10 | 16.79 | 11.12 |
| Spectrum 2     | Yes       | 64.89 | 14.16 | 20.95 |
| Spectrum 3     | Yes       | 66.00 | 24.76 | 9.23  |
| Spectrum 4     | Yes       | 69.67 | 17.84 | 12.49 |
| Spectrum 5     | Yes       | 66.95 | 22.25 | 10.81 |
| Spectrum 6     | Yes       | 72.57 | 12.89 | 14.54 |
| Mean           |           | 68.70 | 18.11 | 13.19 |
| Std. deviation |           | 3.23  | 4.60  | 4.20  |
| Max.           |           | 72.57 | 24.76 | 20.95 |
| Min.           |           | 64.89 | 12.89 | 9.23  |

All results in atomic%

**Figure S68.** SEM image of the residue after the Mg + Ca(OH)<sub>2</sub> reaction (scale bar 100 μm) with the determination of the elemental composition in selected areas. The surface on which was carried out contained C and O, so their value in the table was not taken into account



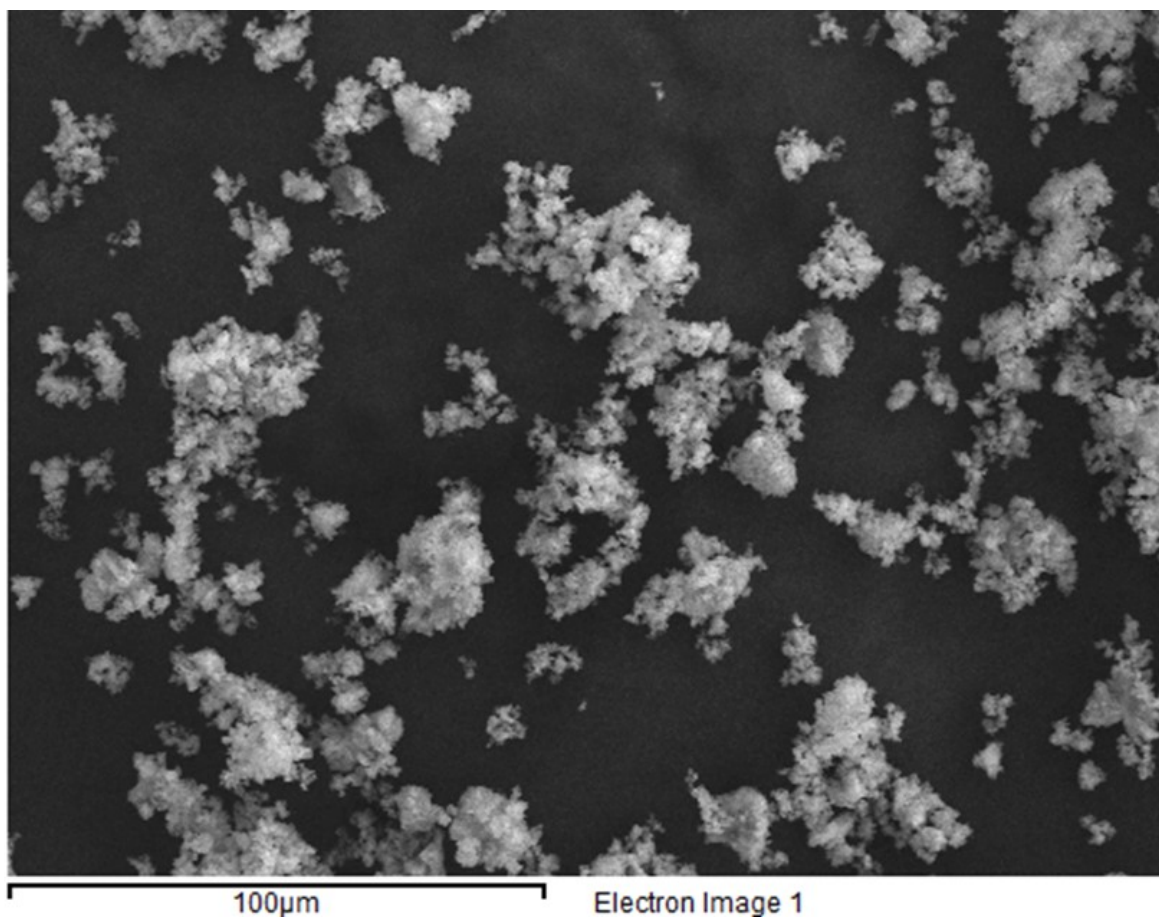

Processing option : All elements analysed (Normalised)

| Spectrum       | In stats. | C     | O     | Mg   | Ca   |
|----------------|-----------|-------|-------|------|------|
| Sum Spectrum   | Yes       | 66.93 | 28.71 | 0.06 | 4.30 |
| Mean           |           | 66.93 | 28.71 | 0.06 | 4.30 |
| Std. deviation |           | 0.00  | 0.00  | 0.00 | 0.00 |
| Max.           |           | 66.93 | 28.71 | 0.06 | 4.30 |
| Min.           |           | 66.93 | 28.71 | 0.06 | 4.30 |

All results in atomic%

**Figure S69.** SEM image of the residue after the  $\text{Ca} + \text{Ca(OH)}_2$  reaction (scale bar 100  $\mu\text{m}$ ) with the determination of the elemental composition in selected areas. The surface on which was carried out contained C and O, so their value in the table was not taken into account



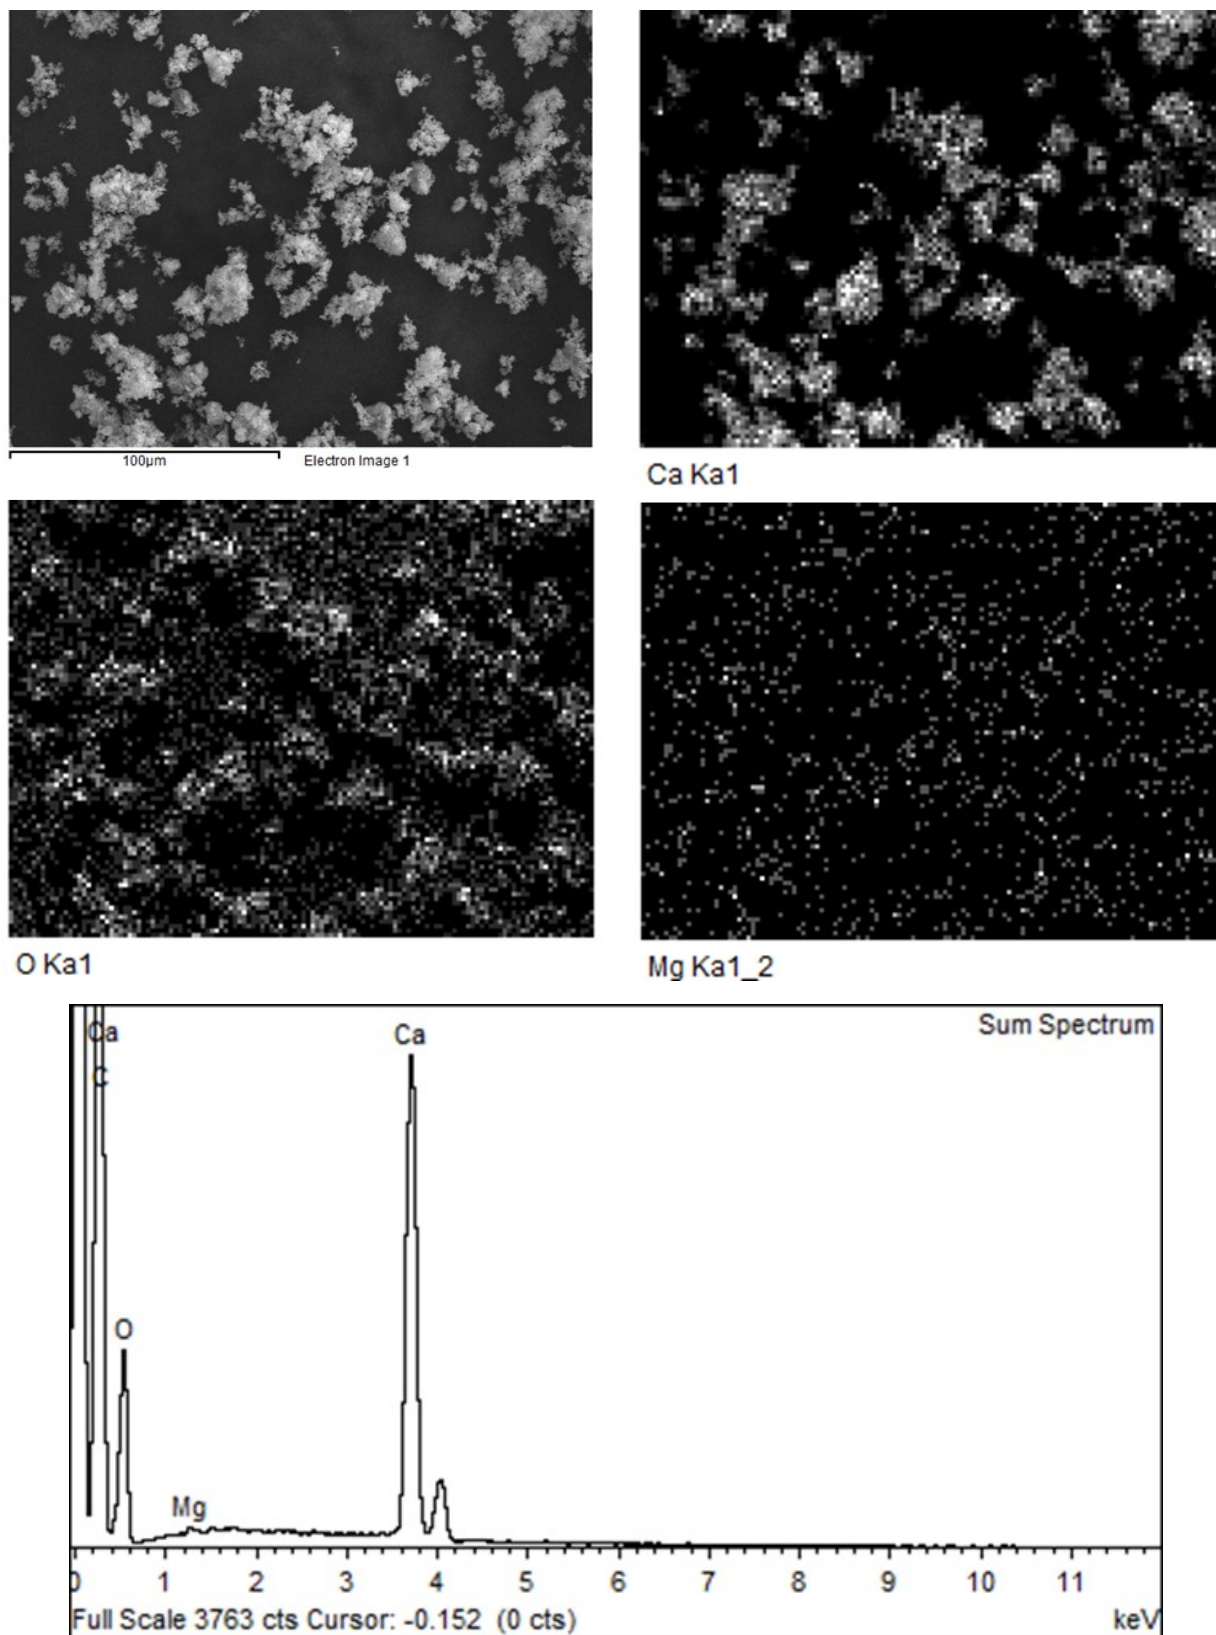

**Figure S70.** EDX mapping (with spectrum below) of the residue after the Ca + Ca(OH)<sub>2</sub> reaction. Scale bar 100 μm

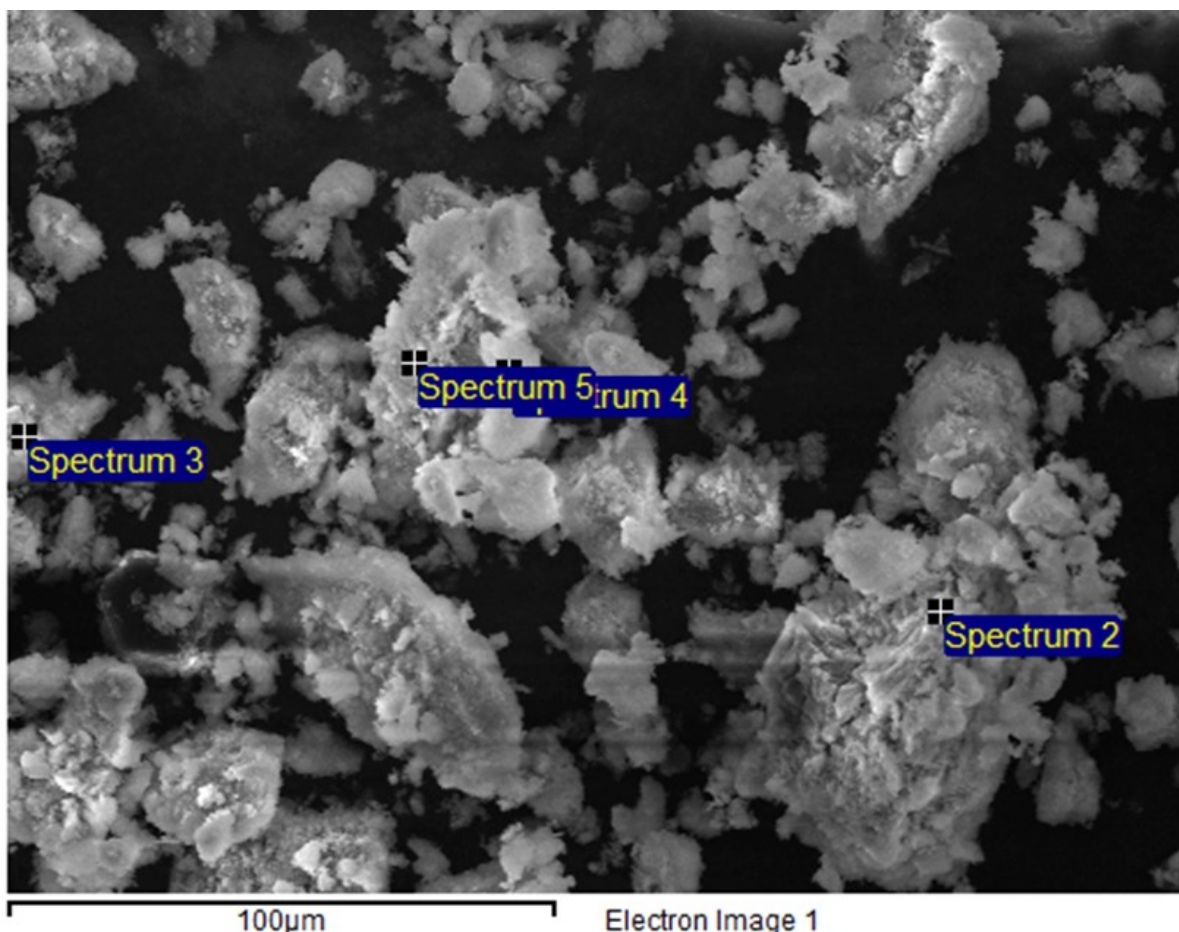

Processing option : All elements analysed (Normalised)

| Spectrum     | In stats. | O     | Al   | Si   | S    | Ca    |
|--------------|-----------|-------|------|------|------|-------|
| Sum Spectrum | Yes       | 81.12 | 0.21 | 0.15 | 0.31 | 18.22 |
| Spectrum 2   | Yes       | 75.46 |      |      | 1.49 | 23.05 |
| Spectrum 3   | Yes       | 76.27 | 3.41 | 1.06 | 0.69 | 18.57 |
| Spectrum 4   | Yes       | 75.19 |      |      |      | 24.81 |
| Spectrum 5   | Yes       | 57.34 |      |      |      | 42.66 |
| Max.         |           | 81.12 | 3.41 | 1.06 | 1.49 | 42.66 |
| Min.         |           | 57.34 | 0.21 | 0.15 | 0.31 | 18.22 |

All results in atomic%

**Figure S71.** SEM image of the residue after the Ca + CCR1 reaction (scale bar 100  $\mu\text{m}$ ) with the determination of the elemental composition in the selected areas. The surface on which was carried out contained C and O, so their value in the table was not taken into account

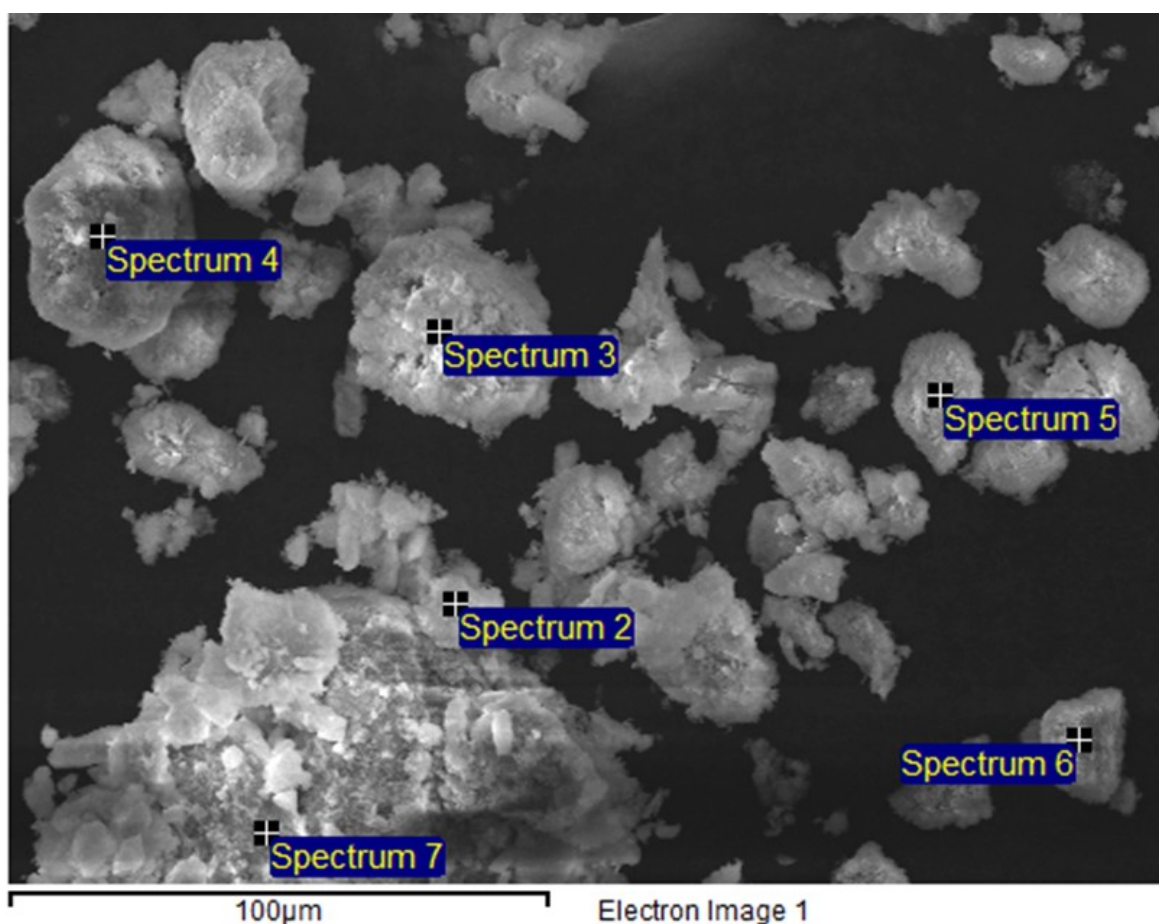

Processing option : All elements analysed (Normalised)

| Spectrum     | In stats. | O     | F     | Si   | K    | Ca     |
|--------------|-----------|-------|-------|------|------|--------|
| Sum Spectrum | Yes       | 61.08 | 16.29 | 0.27 | 0.51 | 21.85  |
| Spectrum 2   | Yes       | 28.10 | 49.90 | 1.18 | 1.21 | 19.61  |
| Spectrum 3   | Yes       | 49.87 | 29.83 | 0.40 | 0.82 | 19.08  |
| Spectrum 4   | Yes       | 65.52 | 15.36 | 0.46 | 0.42 | 18.24  |
| Spectrum 5   | Yes       |       |       |      |      | 100.00 |
| Spectrum 6   | Yes       | 75.17 |       |      |      | 24.83  |
| Spectrum 7   | Yes       | 63.52 | 11.39 |      | 0.68 | 24.41  |
| Max.         |           | 75.17 | 49.90 | 1.18 | 1.21 | 100.00 |
| Min.         |           | 28.10 | 11.39 | 0.27 | 0.42 | 18.24  |

All results in atomic%

**Figure S72.** SEM image of the residue after the Ca + CCR2 reaction (scale bar 100 µm) with the determination of the elemental composition in selected areas. The surface on which was carried out contained C and O, so their value in the table was not taken into account

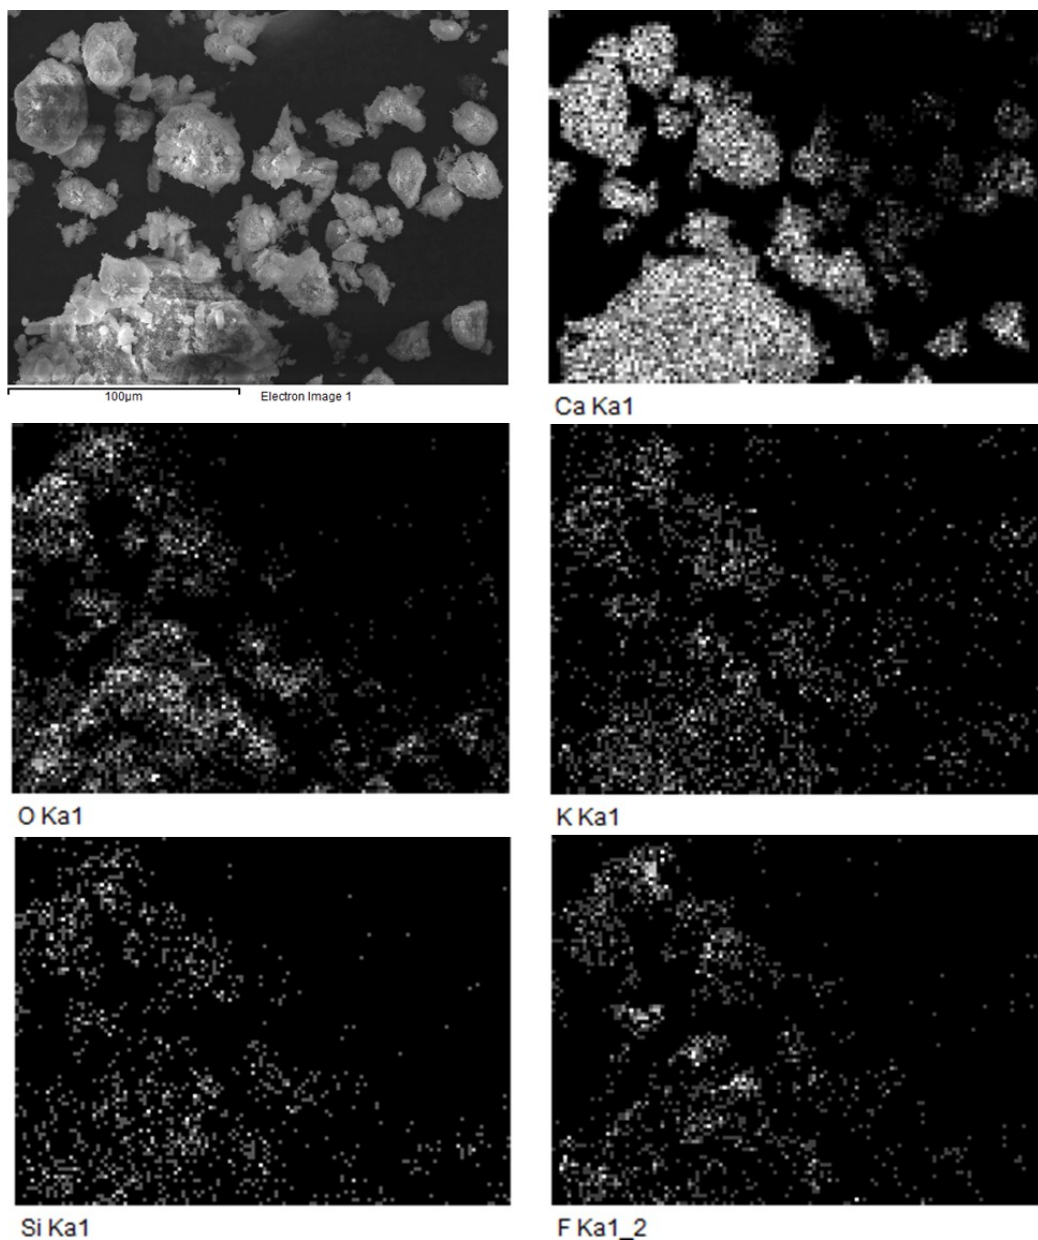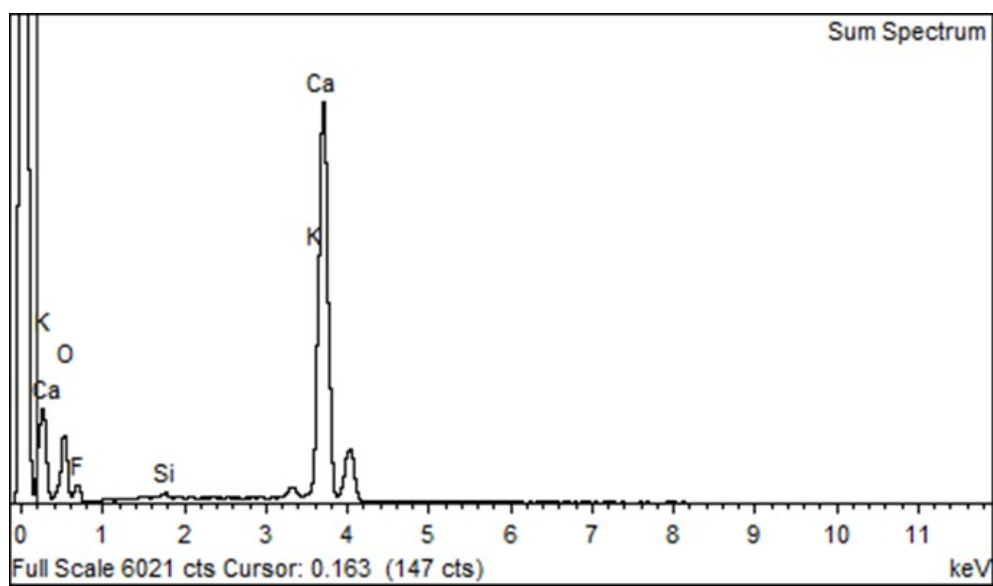

**Figure S73.** EDX mapping (with spectrum below) of the residue after the Ca + CCR2 reaction. Scale bar 100 µm



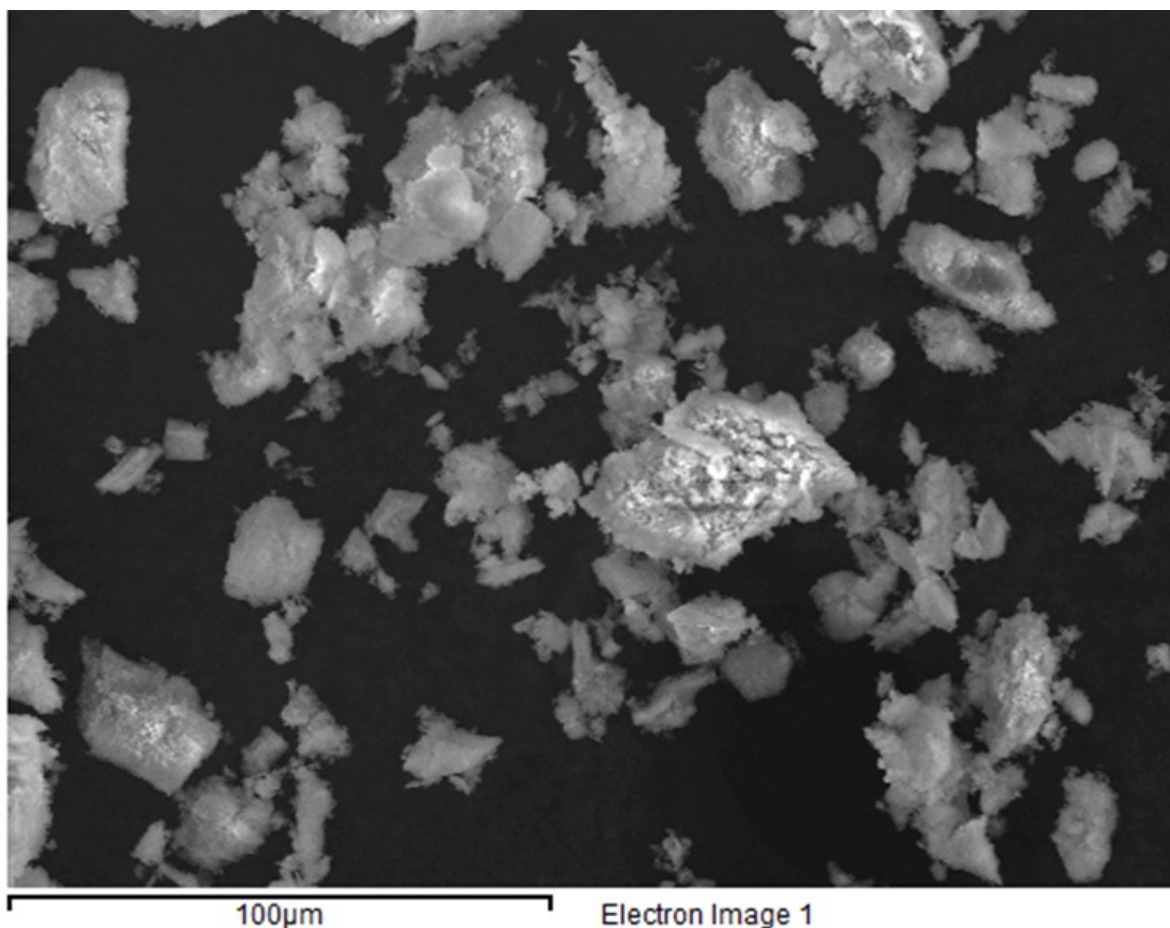

Processing option : All elements analysed (Normalised)

| Spectrum       | In stats | O     | Al   | Si   | S    | Ca    |
|----------------|----------|-------|------|------|------|-------|
| Sum Spectrum   | Yes      | 80.19 | 0.10 | 0.15 | 0.29 | 19.27 |
| Mean           |          | 80.19 | 0.10 | 0.15 | 0.29 | 19.27 |
| Std. deviation |          | 0.00  | 0.00 | 0.00 | 0.00 | 0.00  |
| Max.           |          | 80.19 | 0.10 | 0.15 | 0.29 | 19.27 |
| Min.           |          | 80.19 | 0.10 | 0.15 | 0.29 | 19.27 |

All results in atomic%

**Figure S74.** SEM image of the residue after the  $\text{Ca} + \text{Ca}(\text{OD})_2$  reaction (scale bar 100  $\mu\text{m}$ ) with the determination of the elemental composition in selected areas. The surface on which was carried out contained C and O, so their value in the table was not taken into account

## S7. Powder XRD of residues after hydrogen evolution

**Table S5.** Quantitative phase analysis of samples (wt. %) according to full-profile analysis by the Rietveld method.

| Residue after reaction             | Zn +<br>Ca(OH) <sub>2</sub> | Fe +<br>Ca(OH) <sub>2</sub> | Mg +<br>Ca(OH) <sub>2</sub> | Ca +<br>Ca(OH) <sub>2</sub> | Ca +<br>CCR1 | Ca +<br>CCR2 | Ca +<br>CCR1-d <sub>2</sub> |
|------------------------------------|-----------------------------|-----------------------------|-----------------------------|-----------------------------|--------------|--------------|-----------------------------|
| Portlandite – Ca(OH) <sub>2</sub>  | 50.0                        | 71.0                        | 59.3                        | 91.7                        | 88.8         | 77.2         | 74.0                        |
| Calcite – CaCO <sub>3</sub>        | -                           | 10.1                        | -                           | 3.7                         | 3.9          | 5.8          | 3.1                         |
| Graphite – C                       | -                           | -                           | -                           | -                           | 7.3          | 2.9          | 4.5                         |
| Calcium carbide – CaC <sub>2</sub> | -                           | -                           | -                           | -                           | -            | 2.7          | 3.4                         |
| Aragonite – CaCO <sub>3</sub>      | -                           | -                           | -                           | -                           | -            | <1           | 2.4                         |
| Fluorite – CaF <sub>2</sub>        | -                           | -                           | -                           | -                           | -            | 10.5         | -                           |
| CaO                                | -                           | -                           | 3.2                         | 4.6                         | -            | -            | 12.6                        |
| ZnO                                | 36.7                        | -                           | -                           | -                           | -            | -            | -                           |
| Zn                                 | 13.3                        | -                           | -                           | -                           | -            | -            | -                           |
| FeO                                | -                           | 4.4                         | -                           | -                           | -            | -            | -                           |
| αFe                                | -                           | 14.5                        | -                           | -                           | -            | -            | -                           |
| MgO                                | -                           | -                           | 37.5                        | -                           | -            | -            | -                           |
|                                    |                             |                             |                             |                             |              |              |                             |
| Rp (%)*                            | 7.0                         | 2.5                         | 8.1                         | 9.3                         | 8.2          | 7.8          | 8.7                         |

(\*)  $R_p = \frac{\sum |y_i^{obs} - y_i^{calc}|}{\sum y_i^{obs}}$  - is the factor of convergence of the calculated and experimental X-ray profiles,  $y_i$  is the intensity at each experimental point of the X-ray diffraction pattern.

Considering the decomposition of calcium hydroxide to CaO at the reaction temperature, it certainly cannot be in the final mixture. This means that the calcium hydroxide that is shown in powder XRD is formed either as a result of cooling the mixture in an argon flow (wet argon) or during sample preparation. Therefore, the entire amount of calcium hydroxide indicated in the original table was converted to mole percent and was taken into account as calcium oxide. Then the following table of the mixture composition after hydrogen evolution is obtained:

**Table S6.** The composition of residues after hydrogen evolution (mol. %).

|                   | Zn +<br>Ca(OH) <sub>2</sub> | Fe +<br>Ca(OH) <sub>2</sub> | Mg +<br>Ca(OH) <sub>2</sub> | Ca +<br>Ca(OH) <sub>2</sub> | Ca +<br>CCR1 | Ca +<br>CCR2 | Ca +<br>CCR1-d <sub>2</sub> |
|-------------------|-----------------------------|-----------------------------|-----------------------------|-----------------------------|--------------|--------------|-----------------------------|
| CaO               | 49.0                        | 71.1                        | 75.1                        | 95.0                        | 93.2         | 78.0         | 88.3                        |
| MeO               | 39.6                        | 4.3                         | 24.9                        | -                           | -            | -            | -                           |
| Me                | 11.4                        | 11.0                        | -                           | -                           | -            | -            | -                           |
| CaF <sub>2</sub>  | -                           | -                           | -                           | -                           | -            | 11.2         | -                           |
| CaCO <sub>3</sub> | -                           | 13.7                        | -                           | 5.0                         | 5.5          | 7.9          | 7.9                         |
| C                 | -                           | -                           | -                           | -                           | 1.2          | 0.5          | 0.8                         |
| CaC <sub>2</sub>  | -                           | -                           | -                           | -                           | -            | 2.4          | 3.1                         |

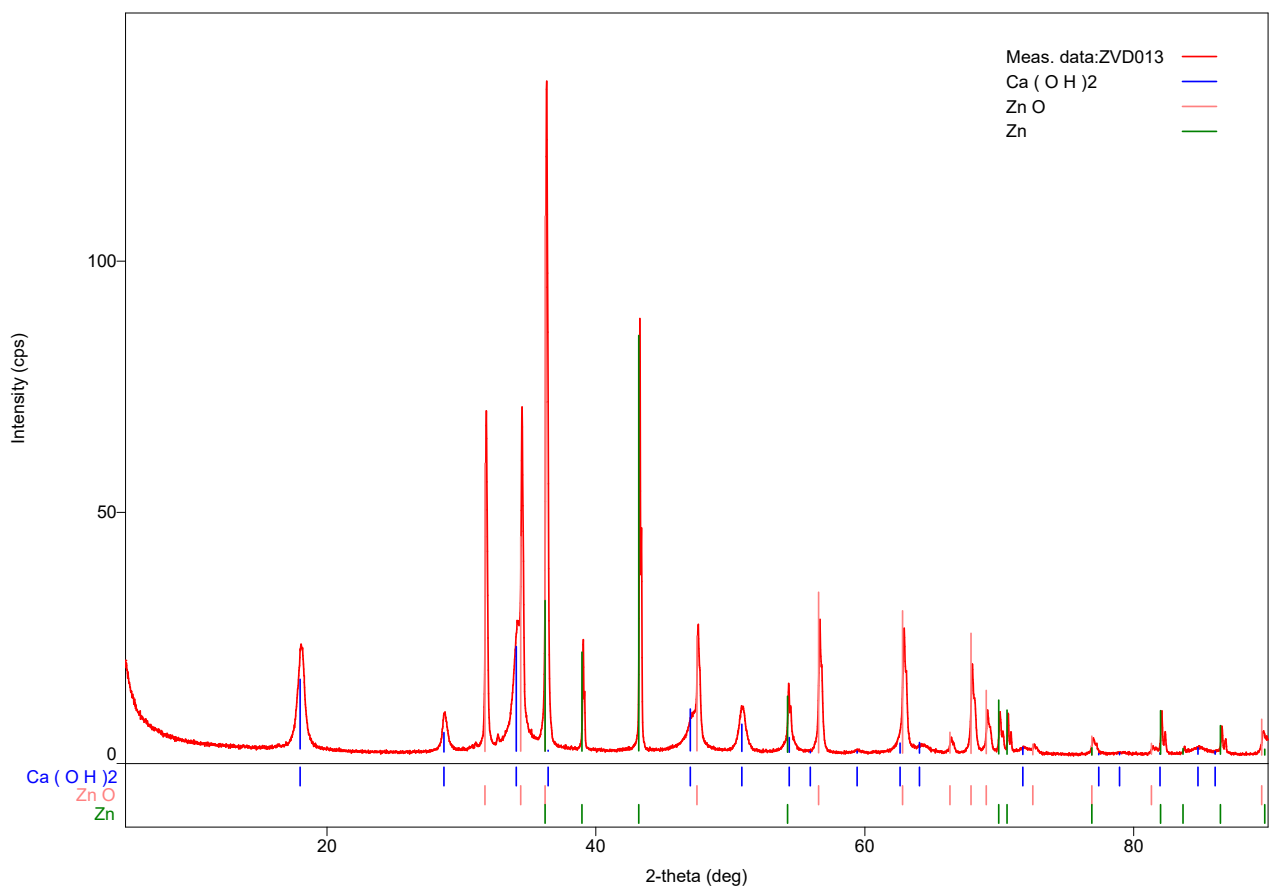

**Figure S75.** X-ray pattern of the residue after the Zn + Ca(OH)<sub>2</sub> reaction

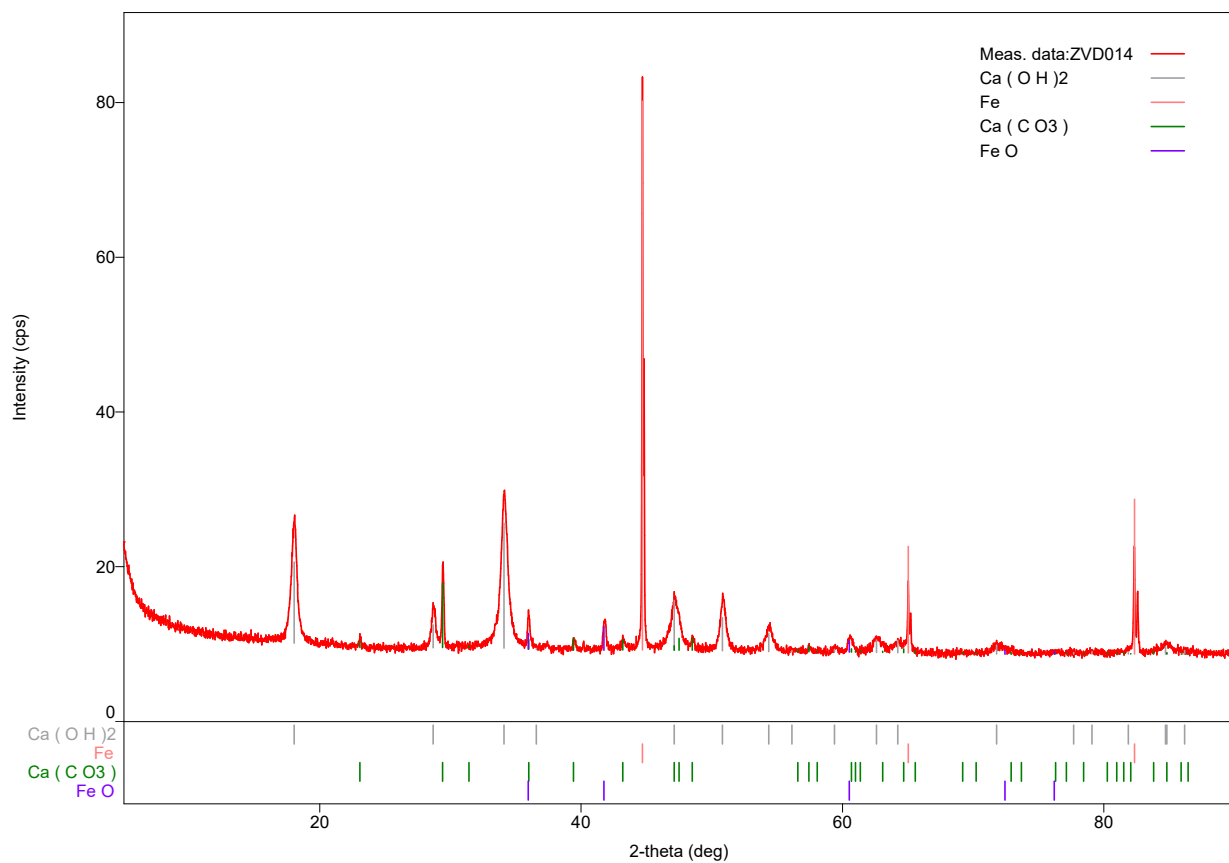

**Figure S76.** X-ray pattern of the residue after the Fe + Ca(OH)<sub>2</sub> reaction

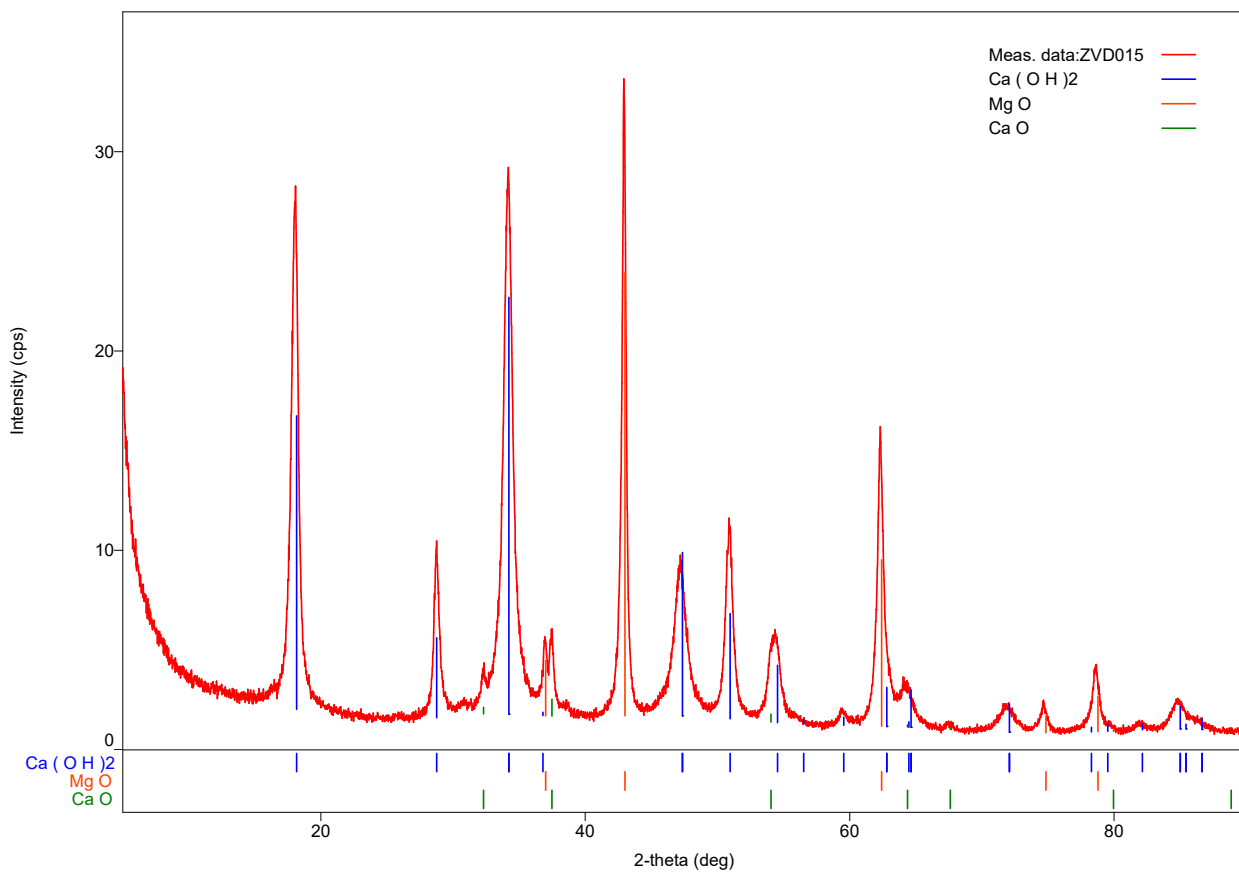

**Figure S77.** X-ray pattern of the residue after the Mg + Ca(OH)<sub>2</sub> reaction

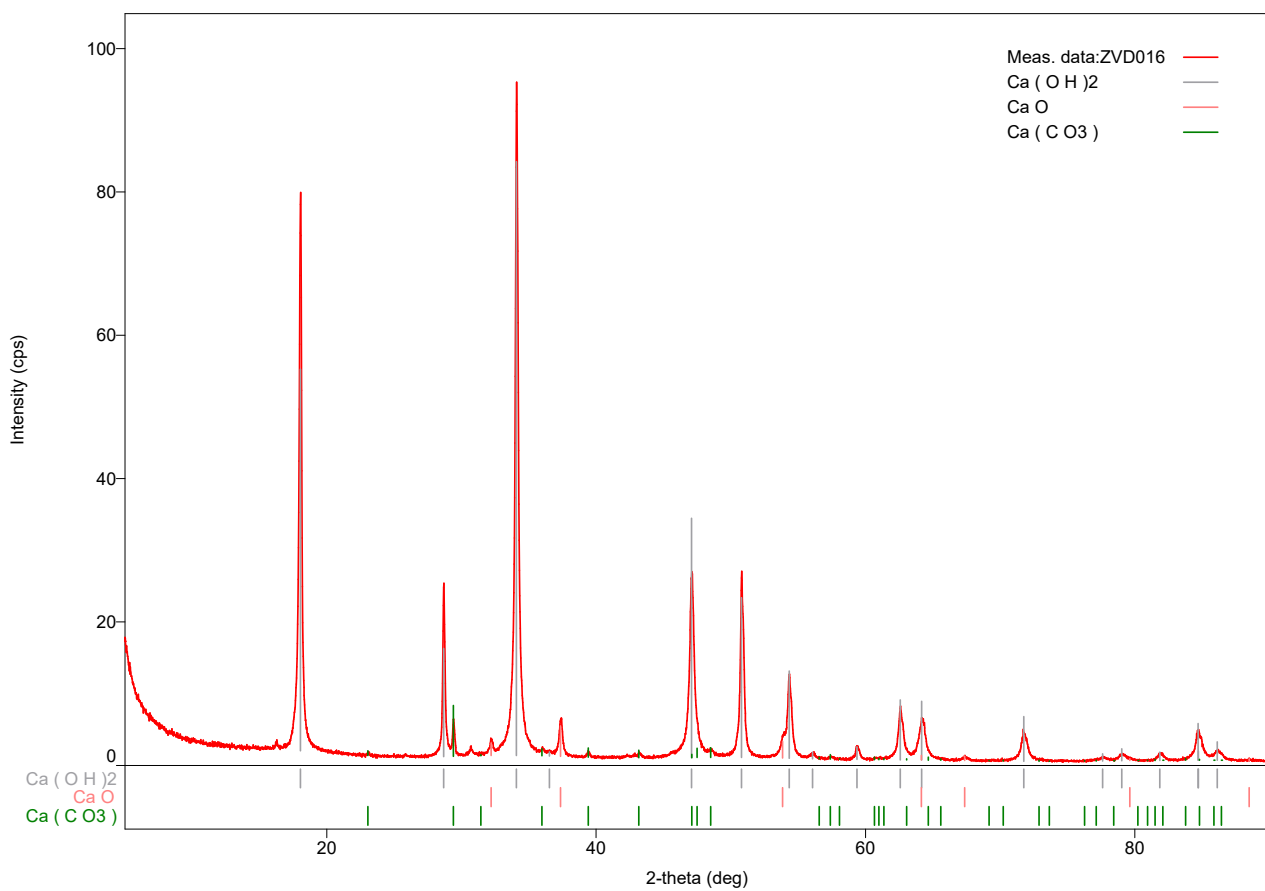

**Figure S78.** X-ray pattern of the residue after the Ca + Ca(OH)<sub>2</sub> reaction



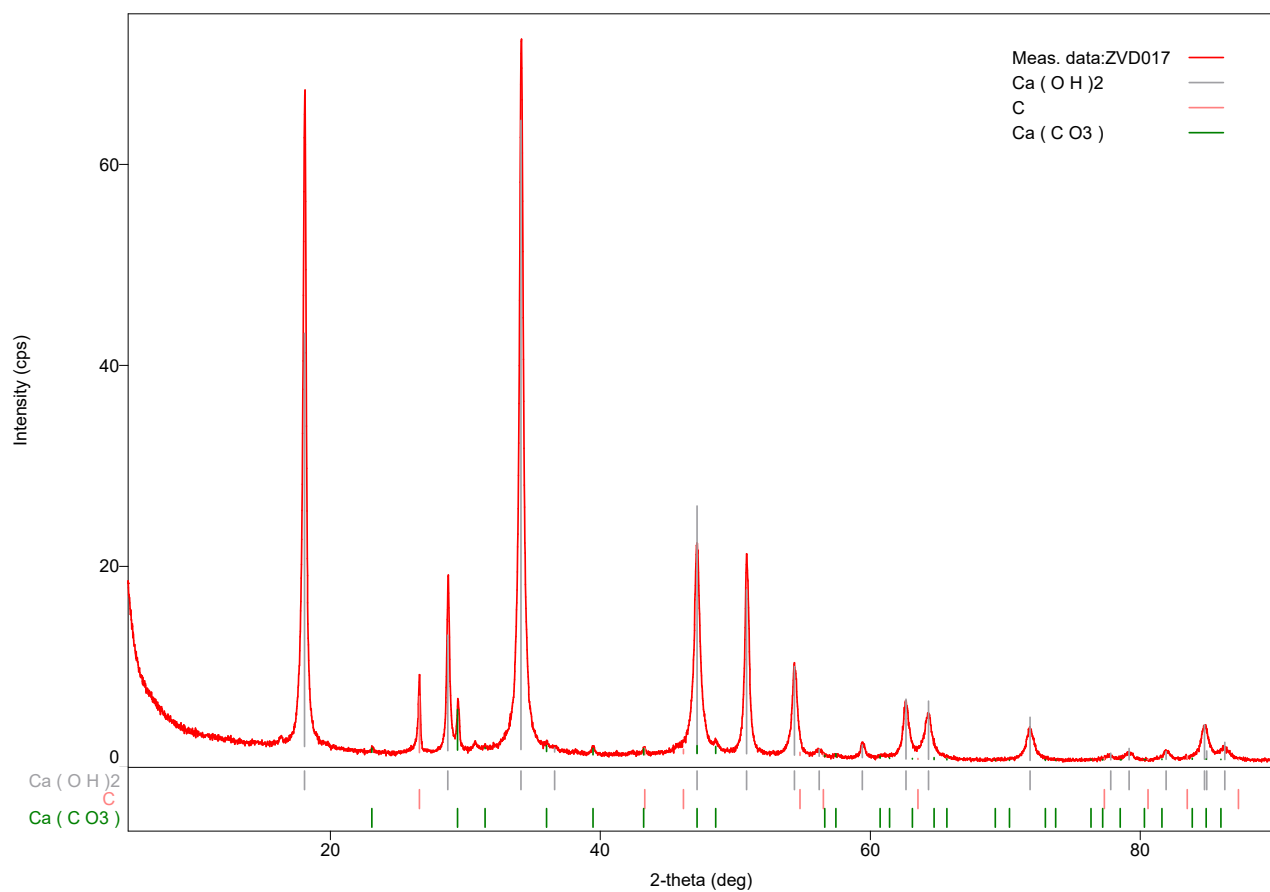

**Figure S79.** X-ray pattern of the residue after the Ca + CCR1 reaction

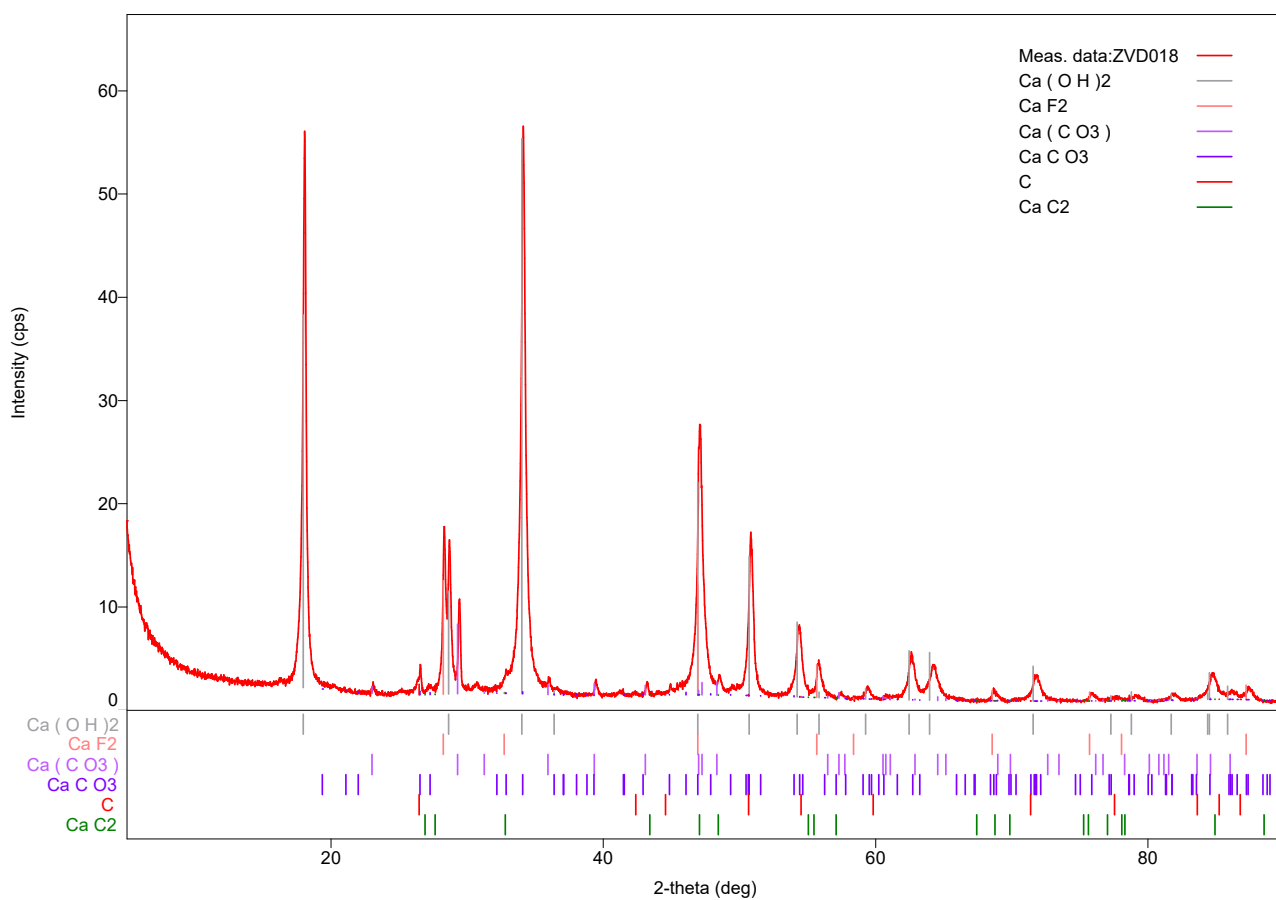

**Figure S80.** X-ray pattern of the residue after the Ca + CCR2 reaction

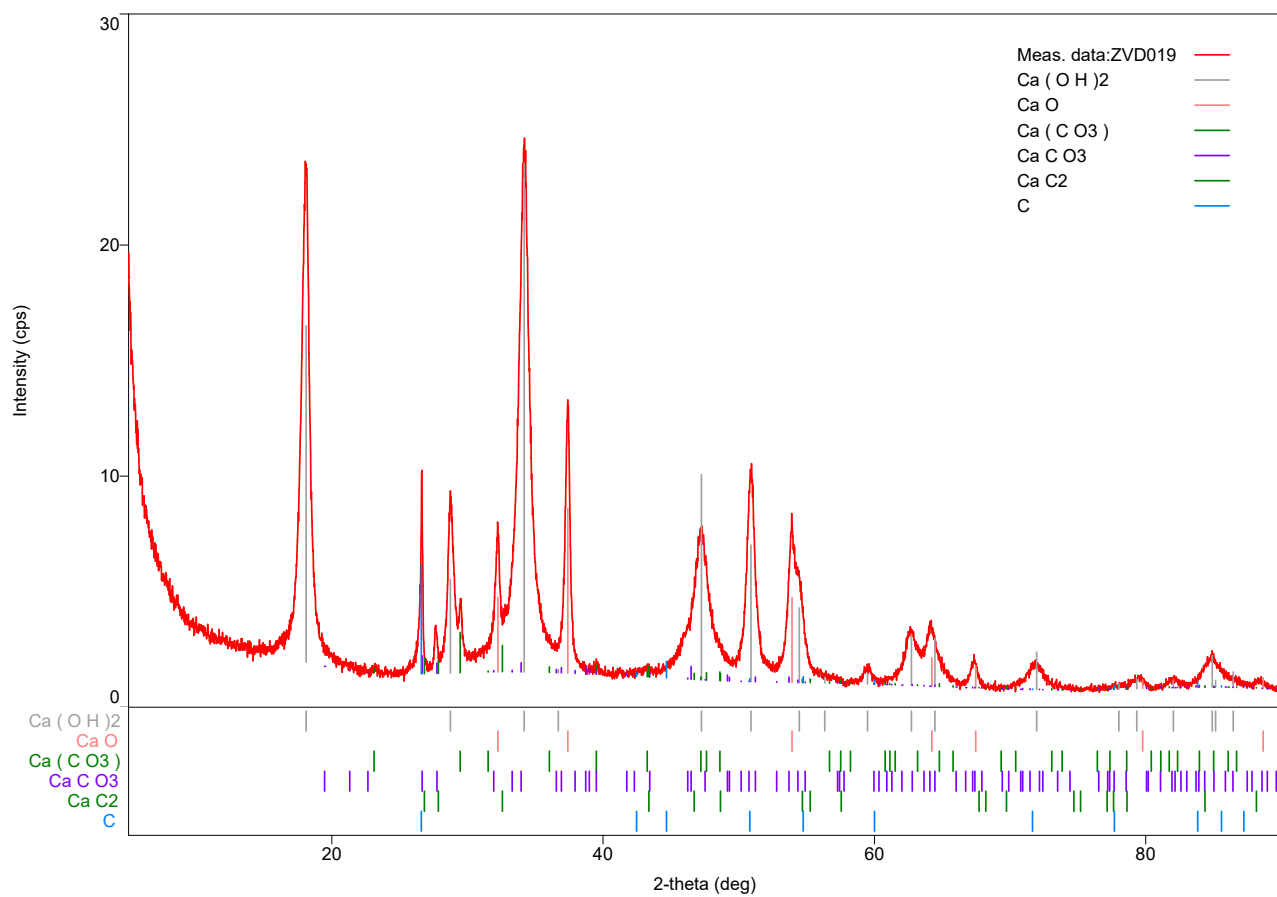

**Figure S81.** X-ray pattern of the residue after the Ca + CCR1-*d*<sub>2</sub> reaction

## S8. References

1. B. Lewis and G. von Elbe, in *Combustion, Flames and Explosions of Gases (Second Edition)*, eds. B. Lewis and G. von Elbe, Academic Press, 1961, DOI: <https://doi.org/10.1016/B978-1-4832-3155-6.50008-5>, pp. 22-70.
2. S. A. Metlyaeva, K. S. Rodygin, K. A. Lotsman, D. E. Samoylenko and V. P. Ananikov, *Green Chem.*, 2021, **23**, 2487-2495.
3. K. A. Lotsman, K. S. Rodygin, I. Skvortsova, A. M. Kuts kaya, M. E. Minyaev and V. P. Ananikov, *Org. Chem. Front.*, 2023, DOI: 10.1039/D2QO01652D.
4. K. S. Erokhin, E. G. Gordeev, D. E. Samoylenko, K. S. Rodygin and V. P. Ananikov, *Int. J. Mol. Sci.*, 2021, **22**, 9919.
